# Supplementary material for: Prognostic utility of the combination of monocyte-to-lymphocyte ratio and neutrophil-to-lymphocyte ratio in patients with NSTEMI after primary percutaneous coronary intervention: a retrospective cohort study
Source: PubMed Central journal article supplement — BMJ Open. 2018 Oct 18;8(10):e023459. doi: 10.1136/bmjopen-2018-023459 (PMC6196857; doi:10.1136/bmjopen-2018-023459), 2018-10-18
Supplement: bmjopen-2018-023459.draft_revisions.pdf [file bmjopen-2018-023459.draft_revisions.pdf]

# BMJ Open

BMJ Open is committed to open peer review. As part of this commitment we make the peer review history of every article we publish publicly available.

When an article is published we post the peer reviewers' comments and the authors' responses online. We also post the versions of the paper that were used during peer review. These are the versions that the peer review comments apply to.

The versions of the paper that follow are the versions that were submitted during the peer review process. They are not the versions of record or the final published versions. They should not be cited or distributed as the published version of this manuscript.

BMJ Open is an open access journal and the full, final, typeset and author-corrected version of record of the manuscript is available on our site with no access controls, subscription charges or pay-per-view fees (<http://bmjopen.bmj.com>).

If you have any questions on BMJ Open's open peer review process please email [info.bmjopen@bmj.com](mailto:info.bmjopen@bmj.com)

# BMJ Open

## Prognostic utility of the combination of monocyte-to-lymphocyte ratio and neutrophil-to-lymphocyte ratio in patients with NSTEMI after primary percutaneous coronary intervention: a retrospective cohort study

|                               |                                                                                                                                                                                           |
|-------------------------------|-------------------------------------------------------------------------------------------------------------------------------------------------------------------------------------------|
| Journal:                      | <i>BMJ Open</i>                                                                                                                                                                           |
| Manuscript ID                 | bmjopen-2018-023459                                                                                                                                                                       |
| Article Type:                 | Research                                                                                                                                                                                  |
| Date Submitted by the Author: | 07-Apr-2018                                                                                                                                                                               |
| Complete List of Authors:     | Fan, Zeyuan; Civil Aviation General Hospital<br>Li, Yang; Civil Aviation General Hospital<br>Ji, Hanhua; Civil Aviation General Hospital<br>Jian, Xinwen; Civil Aviation General Hospital |
| Keywords:                     | Monocyte-to-lymphocyte ratio, Neutrophil-to-lymphocyte ratio, Major adverse cardiac events, Non-ST elevated myocardial infarction                                                         |
|                               |                                                                                                                                                                                           |

SCHOLARONE™  
Manuscripts

Peer Review Only

1  
2  
3 **Prognostic utility of the combination of monocyte-to-lymphocyte ratio and**  
4 **neutrophil-to-lymphocyte ratio in patients with NSTEMI after primary percutaneous**  
5 **coronary intervention: a retrospective cohort study**  
6  
7  
8  
9

10  
11  
12 Zeyuan Fan<sup>1</sup>, Yang Li<sup>1</sup>, Hanhua Ji<sup>1</sup>, Xinwen Jian<sup>1</sup>

13  
14 <sup>1</sup>Department of Cardiovascular Diseases, Civil Aviation General Hospital, Civil Aviation  
15 Clinical Medical College of Peking University, Beijing, China.  
16

17  
18  
19 **Corresponding Author**

20 Xinwen Jian

21 Postal address: No.1 Gaojingjia, Chaoyang District, Beijing 100125, China.

22 Tel: +8615201277863; E-mail: jianxw\_mhzyy@163.com.  
23  
24  
25

26 **WORD COUNT 2775**  
27  
28  
29  
30  
31  
32  
33  
34  
35  
36  
37  
38  
39  
40  
41  
42  
43  
44  
45  
46  
47  
48  
49  
50  
51  
52  
53  
54  
55  
56  
57  
58  
59  
60

## ABSTRACT

**Objectives** This study was aimed to evaluate prognostic value of the combination of monocyte-to-lymphocyte ratio (MLR) with neutrophil-to-lymphocyte ratio (NLR) for predicting long-term major adverse cardiac events (MACE) in patients with non-ST elevated myocardial infarction (NSTEMI) who underwent primary percutaneous coronary intervention (PCI).

**Design** Retrospective cohort study.

**Setting** Civil Aviation General Hospital, Beijing, China.

**Participants** 678 patients with NSTEMI undergoing primary PCI between July 2010 and July 2015 were enrolled.

**Main outcome measures** The main outcomes were MACE. The cumulative MACE-free survival rates were calculated by Kaplan-Meier analysis and the independent predictors of MACE were assessed by COX regression analysis.

**Results:** According to the cut-off values of MLR 0.36 and NLR 2.15, the study population was classified into four groups: low MLR + low NLR group (n = 319), low MLR + high NLR group (n = 126), high MLR + low NLR group (n = 102), and high MLR + high NLR group (n = 131). High MLR + high NLR group had lower MACE-free survival rate than the other three groups (P log-rank < 0.001). Both MLR (hazard ratio (HR): 2.144, 95%CI: 1.510-3.045) and NLR (HR: 2.059, 95%CI: 1.446-2.933) were independent predictors of long-term MACE. Moreover, the patients in high-MLR + high-NLR group had an HR of 4.660 (95%CI: 2.957-7.342) for long-term MACE, compared with the patients in low-MLR + low-NLR group. And ROC curves revealed that the combination of MLR with NLR (areas under curve

(AUC): 0.715) had better performance in differentiating long-term MACE, compared with individual MLR (AUC: 0.683) and NLR (AUC: 0.646) biomarkers ( $P = 0.022$ , and  $P = 0.001$ , respectively).

**Conclusions:** Elevated levels of MLR and NLR were independent predictors of long-term MACE in patients with NSTEMI. Moreover, the combination of MLR and NLR could improve the prognostic value in predicting long-term MACE.

### **Keywords**

Monocyte-to-lymphocyte ratio; Neutrophil-to-lymphocyte ratio; Major adverse cardiac events; Non-ST elevated myocardial infarction

### **Strengths and limitations of this study**

- This is the first study considering the incorporate use of monocyte-to-lymphocyte ratio (MLR) and neutrophil-to-lymphocyte ratio (NLR) for predicting long-term major adverse cardiac events (MACE) in patients with non-ST elevated myocardial infarction (NSTEMI) undergoing primary percutaneous coronary intervention (PCI).
- Elevated MLR and NLR were independently associated with long-term MACE in patients with NSTEMI, while the combination of MLR with NLR has stronger predictive potential for long-term MACE in patients with NSTEMI undergoing primary PCI, compared with individual MLR or NLR.
- MLR and NLR, non-invasive, simple, economical and feasible biomarkers, possess practical clinical utility in the prognosis prediction of NSTEMI.
- These findings need further multi-institutional with larger samples validation.

## INTRODUCTION

Previous studies have verified that inflammatory response plays a vital role in the development of atherosclerosis and cardiovascular diseases.<sup>1 2</sup> White blood cell and its subtypes including neutrophils, monocytes and lymphocytes are important immune cells involved in the initiation, formation and destabilization of atherosclerosis.<sup>3</sup> Neutrophil-to-lymphocyte ratio (NLR) has been established as a cost-effective, feasible and reproducible inflammatory biomarker in many cardiovascular disorders, including acute coronary syndrome (ACS), angina pectoris and heart failure.<sup>4-6</sup> And elevated NLR has been reported as an independent predictor of major adverse cardiac events (MACE) in patients with ACS.<sup>7</sup> Monocytes can recruit to the artery wall, differentiate into macrophages and stimulate the activation of pro-inflammatory cytokines which play a crucial role at every level of the atherosclerotic process.<sup>8</sup> Monocyte-to-lymphocyte ratio (MLR) has emerged as a novel systematic inflammatory marker related with increased cardiovascular risk.<sup>9</sup> Recently, MLR is reported to be associated with adverse clinical outcomes in patients with ST-elevation myocardial infarction (STEMI) and acute heart failure.<sup>10 11</sup> However, the prognostic value of the combined usefulness of MLR and NLR in NSTEMI has not been evaluated. The aim of the present study was to investigate the combined usefulness of MLR and NLR in predicting MACE in patients with NSTEMI who underwent primary percutaneous coronary intervention (PCI).

## MATERIALS AND METHODS

### Study design, setting and participants

This retrospective longitudinal study was performed in Civil Aviation General Hospital, Beijing, China. A total of 818 consecutive NSTEMI patients who underwent primary PCI at the institution from July 2010 to July 2015 were considered for participation in this study. The NSTEMI was defined by typical ischemia symptoms, elevation level of cardiac troponin-I or creatine kinase-MB and no evidence of ST segment elevation in electrocardiography. We excluded patients who had serious heart failure (NYHA Class III or IV), rheumatic heart disease, valvar heart disease, congenital heart disease, pulmonary heart disease, active or chronic inflammatory conditions, acute infection, hemodynamic disorders, malignancies, severe renal (estimated glomerular filtration rate [eGFR] < 30 ml/min/1.73m<sup>2</sup>) or hepatic (alanine-aminotransferase > 40 U/l) disease, steroid therapy in the preceding 3 months, history of cerebrovascular vascular events or incomplete blood cell count or medical records. Hypertension was defined as current use of an antihypertensive medication or, a systolic blood pressure  $\geq$  140 mmHg and/or a diastolic blood pressure  $\geq$  90 mmHg. Diabetes mellitus was defined as active use of an antidiabetic agent, or fasting plasma glucose level  $\geq$  7.0 mmol/L or casual plasma glucose level  $\geq$  11.1 mmol/L.

This research was approved by the Ethical Committee of Civil Aviation General Hospital, and informed consent was obtained from all patients.

## Study procedures and laboratory analysis

Complete blood counts and biochemical indicators were measured at the time of admission by the core laboratory of Civil Aviation General Hospital. Complete blood counts included hemoglobin, white blood cells, neutrophils, monocytes, lymphocytes, and platelets. The biochemical indicators included total cholesterol, triglycerides, creatinine, low density lipoprotein (LDL), high density lipoprotein (HDL), creatinine, high-sensitivity C-reactive protein (hs-CRP) and brain natriuretic peptide (BNP) . eGFR was calculated using the Chronic Kidney Disease Epidemiology (CKD EPI) creatinine equation. The MLR was calculated as the ratio of monocyte counts to lymphocyte counts, and NLR was calculated as the ratio of neutrophil counts to lymphocyte counts.

All patients received a loading dose of aspirin (300 mg) and clopidogrel (300 mg) at least 6 hours before PCI, and an intravenous dose of heparin (70 to 100 U/kg) to maintain an activated clotting time 250-300 seconds during the procedure. Primary PCI was performed according to standard clinical practice by experienced cardiologists. A successful PCI was defined as a residual stenosis less than 30% and final thrombolysis in myocardial infarction (TIMI) II or III flow in the treated artery. Angiographic characteristics were collected for all the patients.

## Clinical outcomes

The main outcomes were MACE happened in-hospital and during the follow-up period, which were defined as a composite of all-cause mortality, cardiac death, stroke, non-fatal MI,



1  
2  
3 target lesion revascularization (TLR) and target vessel revascularization (TVR) according to  
4  
5 the Academic Research Consortium definition.<sup>12</sup> Cardiac death was defined as death resulting  
6  
7 from any cardiac-related causes (eg, MI, heart failure, lethally cardiac arrhythmia). Nonfatal  
8  
9 MI was defined based on the European Society of Cardiology, American Heart Association,  
10  
11 American College of Cardiology, and World Heart Federation definitions.<sup>13</sup> TLR was defined  
12  
13 as a repeat revascularization caused by a stenosis  $\geq 50\%$  within the stent or within a 5-mm  
14  
15 proximal or distal to the stent. TVR was defined as a repeat coronary angioplasty or surgical  
16  
17 bypass performed within the coronary artery containing the target lesion. Follow-up data  
18  
19 were obtained by review of electronic medical records and/or telephone interview with the  
20  
21 patients or patients' primary caregiver.  
22  
23  
24  
25  
26  
27  
28

### 29 **Statistical analysis**

30  
31  
32 Continuous data were expressed as mean  $\pm$  standard deviation (SD) or median (interquartile  
33  
34 range). The Kolmogorov-Smirnov test was used to analyze the normal distribution of  
35  
36 continuous data. Student's t test or the Mann-Whitney U test, or one-way ANOVA model was  
37  
38 used for the comparisons of continuous variables. Categorical data were expressed as  
39  
40 numbers and percentages and compared using Chi-square tests. ROC curves were utilized to  
41  
42 determine the ability of MLR and NLR to differentiate MACE. The optimal cut-off values  
43  
44 were derived from Youden's index. The MACE-free survival rates according to the cut-off  
45  
46 values of MLR and NLR were estimated by the Kaplan-Meier analysis and statistical  
47  
48 differences were carried out using the Log-rank test. Univariate and multivariate COX  
49  
50 regression analyses were carried out to identify the independent predictors of MACE. The  
51  
52  
53  
54  
55  
56  
57  
58  
59  
60

1  
2  
3 statistical significance was considered as a 2-tailed  $P < 0.05$ . Statistical analyses were  
4  
5 performed using SPSS version 22.0 (SPSS Inc., Chicago, IL, USA).  
6  
7

## 8 **RESULTS**

9  
10 818 patients were screened for inclusion for this study, while 91(11.12%) patients were  
11  
12 excluded because of the exclusion criteria and 49 (6.00%) patients were lost to the follow-up.  
13  
14 Therefore, a total of 678 (82.89%) patients were included into the analysis, and the median  
15  
16 follow-up period was 26 (range: 1-30) months. **Figure 1** depicted the clinical layout of the  
17  
18 study cohort.  
19  
20  
21  
22  
23  
24

### 25 **Baseline clinical characteristics**

26  
27 A MLR cut-off value of 0.36 had 54.74% sensitivity and 73.57% specificity and a NLR  
28  
29 cut-off value of 2.35 had 77.37% sensitivity and 55.08% specificity for differentiating  
30  
31 long-term MACE, via ROC analysis. According to the optimal cut-off values of MLR 0.36  
32  
33 and NLR 2.35, participants were classified into four groups: low-MLR + low-NLR group  
34  
35 (MLR < 0.36, NLR < 2.35, n=319), low-MLR + high-NLR group (MLR < 0.36, NLR ≥ 2.35,  
36  
37 n=126), high-MLR + low-NLR group (MLR ≥ 0.36, NLR < 2.35, n=102) and high-MLR +  
38  
39 high-NLR group (MLR ≥ 0.36, NLR ≥ 2.35, n=131). The clinical characteristics were  
40  
41 summarized in **Table 1**. The distribution of cardiovascular conventional risk factors, prior  
42  
43 medications and angiographic findings were similar between the four groups. However,  
44  
45 patients in high-MLR + high-NLR group were older, with higher Killip class and lower  
46  
47 ejection fraction, and showed higher levels of white blood cells, monocytes, neutrophils, LDL,  
48  
49 hs-CRP and BNP, whereas they had lower lymphocytes.  
50  
51  
52  
53  
54  
55  
56

**Table 1 Baseline Clinical Characteristics between the four groups based on the cut-off values of MLR and NLR**

| Variable                           | Low-MLR     | Low-MLR      | High-MLR                  | High-MLR                   | P-value |
|------------------------------------|-------------|--------------|---------------------------|----------------------------|---------|
|                                    | +           | +            | +                         | +                          |         |
|                                    | Low-NLR     | High-NLR     | Low-NLR                   | High-NLR                   |         |
|                                    | (n=319)     | (n=126)      | (n=102)                   | (n=131)                    |         |
| Age /(year)                        | 61.1±14.38  | 63.63±15.05  | 64.05±15.15               | 65.23±16.34*               | 0.036   |
| Male, n (%)                        | 209(65.5%)  | 71(56.3%)    | 65(63.7%)                 | 90(68.7%)                  | 0.188   |
| Family history, n (%)              | 33(10.3%)   | 17(13.5%)    | 11(10.8%)                 | 20(15.3%)                  | 0.463   |
| Hypertension, n(%)                 | 221(69.3%)  | 86(68.3%)    | 73(71.6%)                 | 105(80.2%)                 | 0.100   |
| Diabetes Mellitus, n(%)            | 125(39.2%)  | 56(44.4%)    | 39(38.2%)                 | 59(45.0%)                  | 0.522   |
| Dyslipidemia, n (%)                | 114(35.7%)  | 51(40.5%)    | 35(34.3%)                 | 49(37.4%)                  | 0.758   |
| Current Smoker, n (%)              | 108(33.9%)  | 45(35.7%)    | 33(32.4%)                 | 51(38.9%)                  | 0.702   |
| Killip class (> I)                 | 192(60.2%)  | 86(68.3%)    | 69(67.6%)                 | 99(75.6%)*                 | 0.015   |
| <b>Laboratory parameters</b>       |             |              |                           |                            |         |
| White blood cell, ×10 <sup>9</sup> | 6.67±1.72   | 6.77±2.03    | 7.06±1.98*                | 7.25±2.11*                 | 0.027   |
| Neutrophil, ×10 <sup>9</sup>       | 4.26±1.07   | 4.69±1.19*   | 4.56±1.15*                | 5.08±1.27*+ <sup>#</sup>   | <0.001  |
| Lymphocyte, ×10 <sup>9</sup>       | 2.31±0.53   | 1.98±0.51*   | 2.37±0.67 <sup>+</sup>    | 2.02±0.64* <sup>#</sup>    | <0.001  |
| Monocyte, ×10 <sup>9</sup>         | 0.18±0.09   | 0.22±0.11*   | 0.49±0.19* <sup>+</sup>   | 0.46±0.13* <sup>+</sup>    | <0.001  |
| Hemoglobin, g/L                    | 136.7±30.38 | 129.6±27.57* | 133.7±39.76               | 127.4±36.01*               | 0.039   |
| Total cholesterol /(mmol/L)        | 5.7±1.47    | 5.95±1.49    | 5.52±1.35                 | 5.69±1.36                  | 0.130   |
| Triglycerides /(mmol/L)            | 1.67±0.56   | 1.63±0.54    | 1.77±0.59                 | 1.61±0.54                  | 0.109   |
| LDL/(mmol/L)                       | 2.86±0.95   | 3.1±1.08*    | 2.93±1.12 <sup>#</sup>    | 3.35±1.06* <sup>+#</sup>   | <0.001  |
| HDL/(mmol/L)                       | 1.31±0.51   | 1.43±0.57    | 1.37±0.49                 | 1.44±0.51                  | 0.059   |
| hs-CRP, mg/dL                      | 1.85±0.71   | 2.14±0.98*   | 2.88±0.77* <sup>+</sup>   | 3.13±1.02* <sup>+#</sup>   | <0.001  |
| Creatinine umol/L                  | 112.38±29.2 | 106.49±30    | 112.72±37.44              | 107.62±34.02               | 0.203   |
| eGFR, ml/min/1.73m <sup>2</sup>    | 85.7±29.1   | 81.9±28.7    | 78.9±26.3                 | 81.3±27.1                  | 0.102   |
| BNP/(pg/ml)                        | 265.1±82.74 | 245.6±79.38* | 269.7±87.57* <sup>+</sup> | 298.7±97.15* <sup>+#</sup> | <0.001  |
| <b>Medical Treatment</b>           |             |              |                           |                            |         |
| Aspirin, n(%)                      | 309(96.9%)  | 119(94.4%)   | 96(94.1%)                 | 129(98.5%)                 | 0.202   |
| Anticoagulant, n(%)                | 305(95.6%)  | 117(92.9%)   | 93(91.2%)                 | 124(94.7%)                 | 0.340   |
| Statin, n(%)                       | 292(91.5%)  | 112(88.9%)   | 90(88.2%)                 | 121(92.4%)                 | 0.589   |
| ACEI or ARB, n(%)                  | 186(58.3%)  | 71(56.3%)    | 61(59.8%)                 | 84(64.1%)                  | 0.602   |

|                                        |             |            |            |            |       |
|----------------------------------------|-------------|------------|------------|------------|-------|
| Beta-blocker, n(%)                     | 259(81.2%)  | 98(77.8%)  | 86(84.3%)  | 105(80.2%) | 0.654 |
| Calcium-channel blockers,<br>n(%)      | 67(21%)     | 30(23.8%)  | 26(25.5%)  | 28(21.4%)  | 0.767 |
| Nitrate drugs, n(%)                    | 257(80.6%)  | 96(76.2%)  | 75(73.5%)  | 106(80.9%) | 0.369 |
| <b>Angiographic Findings</b>           |             |            |            |            |       |
| Number of diseased vessels             |             |            |            |            | 0.145 |
| one-vessel, n(%)                       | 182(57.05%) | 65(51.59%) | 54(52.94%) | 57(43.51%) |       |
| two-vessel, n(%)                       | 76(23.82%)  | 39(30.95%) | 32(31.37%) | 42(32.06%) |       |
| three-vessel/ Left main, n(%)          | 61(19.12%)  | 22(17.46%) | 16(15.69%) | 32(24.43%) |       |
| Number of Implanted Stents             | 1.95±0.79   | 2.01±0.85  | 2.11±0.94  | 2.15±1.01  | 0.125 |
| Total stent length, mm                 | 39.6±24.1   | 37.2±21.9  | 35.8±26.3  | 41.9±22.2  | 0.190 |
| Stent diameter, mm                     | 2.59±1.33   | 2.85±1.09  | 2.84±1.27  | 2.68±1.16  | 0.114 |
| Moderate or severe tortuosity, n(%)    | 27(8.5%)    | 16(12.7%)  | 11(10.8%)  | 14(10.7%)  | 0.575 |
| Moderate or severe calcification, n(%) | 29(9.1%)    | 14(11.1%)  | 13(12.7%)  | 15(11.5%)  | 0.706 |

\*: compared with low-MLR and low-NLR group,  $p < 0.05$ ;

+: compared with low-MLR and high-NLR group,  $p < 0.05$ ;

#: compared with high-MLR and high-NLR group,  $p < 0.05$ .

ACEI, angiotensin-converting enzyme inhibitor; ARB, angiotensin receptor blocker; BNP, brain natriuretic peptide; eGFR, estimated glomerular filtration rate; HDL, high-density lipoprotein; hs-CRP: high-sensitivity C-reactive protein; LDL, low-density lipoprotein; MLR, monocyte-to-lymphocyte ratio; NLR, neutrophil-to-lymphocyte ratio.

### Clinical outcomes

During the median follow-up period of 26 months, long-term MACE were observed in 139 (20.50%) patients. 10 (1.47%) patients died, 40 (5.90%) patients had a non-fatal MI, 24(3.54%) patients experienced stroke, 61(9.00%) patients underwent TLR and 4 (0.59%) patients underwent TVR. Overall, the patients in the high-MLR + high-NLR group had higher MACE rate, compared to the other three groups. The mortality, non-fatal MI, stroke and TLR were significantly higher in patients with high-MLR + high-NLR, than those with

either lower MLR or lower NLR, whereas the four groups had similar TVR (**Table 2**).

The Kaplan-Meier curves based on the cut-off value of MLR and NLR, were presented in **Figure 2A** and **Figure 2B**, respectively. Significantly increased long-term MACE rates were observed in patients with high MLR (33.5% vs. 13.7%,  $P < 0.001$ , **Figure 2A**) and in patients with high NLR (31.5% vs. 13.8%,  $P < 0.001$ , **Figure 2B**). The Kaplan-Meier MACE-free curve based on the combined markers was shown in **Figure 2C**. The MACE rates were significantly different among the four groups ( $P < 0.001$ ) and patients in high-MLR + high-NLR group had the highest MACE rate.

**Table 2 Clinical outcomes between the four groups based on the cut-off values of MLR and NLR**

| Variable                 | Low-MLR<br>+       | Low-MLR<br>+        | High-MLR<br>+      | High-MLR<br>+       | P-value |
|--------------------------|--------------------|---------------------|--------------------|---------------------|---------|
|                          | Low-NLR<br>(n=319) | High-NLR<br>(n=126) | Low-NLR<br>(n=102) | High-NLR<br>(n=131) |         |
| <b>Follow-up 2 years</b> | 30(9.4%)           | 31(24.6%)*          | 28(27.5%)*         | 50(38.2%)*+#        | <0.001  |
| All- cause death         | 2(0.6%)            | 1(0.8%)             | 1(1.0%)            | 6(4.6%)*            | 0.010   |
| Cardiac death            | 1(0.3%)            | 1(0.8%)             | 1(1.0%)            | 5(3.8%)*            | 0.018   |
| Nonfatal MI              | 9(2.8%)            | 8(6.3%)             | 9(8.8%)*           | 14(10.7%)*          | 0.006   |
| Stroke                   | 4(1.3%)            | 6(4.8%)*            | 5(4.9%)*           | 9(6.9%)*            | 0.017   |
| TLR                      | 14(4.4%)           | 16(12.7%)*          | 12(11.8%)*         | 19(14.5%)*          | 0.001   |
| TVR                      | 1(0.3%)            | 0(0%)               | 1(1.0%)            | 2(1.5%)             | 0.335   |

\*: compared with low-MLR and low-NLR group,  $p < 0.05$ ;

+: compared with low-MLR and high-NLR group,  $p < 0.05$ ;

#: compared with high-MLR and high-NLR group,  $p < 0.05$ .

MI, myocardial infarction; TLR: target lesion revascularization; TVR: target vessel revascularization.

### Independent predictors of long-term MACE

Multivariate COX regression analyses were utilized to determine the independent predictors

of long-term MACE in patients with NSTEMI undergoing primary PCI. On multivariate COX analysis, both MLR (HR 2.144, 95% CI 1.510-3.045,  $P < 0.001$ ) and NLR (HR 2.059, 95% CI 1.446-2.933,  $P < 0.001$ ) were found to be significant predictors of long-term MACE. And the combination of MLR and NLR was found to be an independent predictor of long-term MACE (HR 4.660, 95% CI: 2.957-7.342,  $P < 0.001$  for patients with high-MLR + high NLR vs. patients with low-MLR + low-NLR). In addition to MLR and NLR, hs-CRP and BNP were independent predictors of long-term MACE in patients with NSTEMI undergoing primary PCI (**Table 3**).

**Table 3 Independent predictors of long-term MACE in Patients with NSTEMI by COX regression analyses**

| Variable                   | Hazard Ratio | 95% Confidence Interval | P value |
|----------------------------|--------------|-------------------------|---------|
| <b>Model 1</b>             |              |                         |         |
| MLR                        |              |                         |         |
| Low MLR, MLR<0.36          | Ref          | -                       | -       |
| High MLR, MLR $\geq$ 0.36  | 2.144        | 1.510-3.045             | <0.001  |
| NLR                        |              |                         |         |
| Low NLR, NLR<2.15          | Ref          | -                       | -       |
| High NLR, NLR $\geq$ 2.15  | 2.059        | 1.446-2.933             | <0.001  |
| BNP                        | 1.791        | 1.134-2.829             | 0.004   |
| hs-CRP                     | 2.054        | 1.173-3.597             | 0.012   |
| <b>Model 2</b>             |              |                         |         |
| Combination of MLR and NLR |              |                         |         |
| Low-MLR + Low-NLR          | Ref          | -                       | -       |
| Low-MLR + High-NLR         | 2.807        | 1.699-4.637             | <0.001  |
| High-MLR + Low-NLR         | 3.002        | 1.785-5.049             | <0.001  |
| High-MLR + High-NLR        | 4.660        | 2.957-7.342             | <0.001  |
| BNP                        | 1.976        | 1.200-3.254             | 0.007   |
| hs-CRP                     | 2.034        | 1.207-3.428             | 0.008   |

BNP, brain natriuretic peptide; hs-CRP: high-sensitivity C-reactive protein; MLR, monocyte-to-lymphocyte ratio; NLR, neutrophil-to-lymphocyte ratio.

### **Diagnostic efficacy of MLR and NLR in differentiating MACE**

ROC curves were to test the diagnostic efficacy of MLR, NLR and the combination of MLR with NLR, for differentiating long-term MACE. MLR (AUC: 0.683, 95%CI: 0.647-0.718) had a similar AUC value as NLR (AUC: 0.646, 95%CI: 0.609-0.682). Additionally, the combination of MLR with NLR has the largest AUC area (AUC: 0.715, 95%CI: 0.679-0.748). Pairwise comparisons of ROC curves revealed that the combination of MLR with NLR had the highest discriminative potential for the detection of long-term MACE ( $P = 0.022$ , for MLR+NLR vs. MLR;  $P = 0.001$ , for MLR+NLR vs. NLR), whereas MLR had the comparable ability with NLR for differentiating long-term MACE ( $P = 0.247$ ) (**Figure 3**).

## **DISCUSSION**

In this study, there were 139 of 678 patients (20.5%) presented with MACE, during the follow-up period. The MACE rate was comparable between our study and the previous study (21.6%).<sup>14</sup> [14]. The novel finding of the present study was that elevated MLR and NLR were independently associated with adverse clinical outcomes in patients with NSTEMI. Moreover, the study demonstrated for the first time that the combination of MLR with NLR has stronger predictive potential for long-term MACE in patients with NSTEMI undergoing primary PCI, compared with individual MLR or NLR.

Many compelling studies have clearly indicated that NLR can be a reliable prognostic factor for short and long-term adverse outcomes in patients with acute coronary syndrome

1  
2  
3 undergoing PCI.<sup>15 16</sup> Neutrophils, the most abundant white blood cells in the circulation, are  
4  
5 actively involved in the atherogenesis and plaque destabilization.<sup>17 18</sup> Several mechanisms can  
6  
7 probably explain the pivotal role of neutrophils in atherosclerosis: (1) Neutrophils can  
8  
9 infiltrate coronary atherosclerotic plaques and the infarcted myocardium, and mediate tissue  
10  
11 damage by releasing matrix-degrading enzymes and reactive oxygen species; (2) Increases in  
12  
13 neutrophil counts can aggravate endothelial dysfunction, modulate microvascular  
14  
15 permeability and contribute to foam cell formation; (3) Neutrophils can promote endothelial  
16  
17 erosion, weaken fibrous cap and accelerate neointima formation which contribute to plaque  
18  
19 destabilization.<sup>19-22</sup> Lymphocytes are an integral part of the immune system, which participate  
20  
21 in every phase of atherosclerosis. Lymphocytopenia, resulting from increased lymphocytes  
22  
23 apoptosis, contributes to post-infarct cardiac remodeling and progression.<sup>3 23</sup> Lower  
24  
25 lymphocyte count was reported to be associated with worse cardiovascular outcomes.<sup>24</sup>  
26  
27 Obviously, it could be concluded that NLR, a composite marker of neutrophils and  
28  
29 lymphocytes, can provide prognostic value in ACS patients. In agreement with previous  
30  
31 evidence, our study confirmed the prognostic role of increased NLR in patients with  
32  
33 NSTEMI.  
34  
35  
36  
37  
38  
39  
40  
41

42  
43 MLR, a novel composite marker, has been recently reported as a prognostic factor in  
44  
45 many diseases, especially various malignancies.<sup>25 26</sup> To date, just a few studies have  
46  
47 attempted to elucidate the impact of MLR on cardiovascular disease. In our previous studies,  
48  
49 MLR had the potential in assessing coronary lesion severity,<sup>9</sup> and identifying the vulnerable  
50  
51 plaques in patients with stable angina<sup>27</sup>. Siva et al. showed that increased MLR level was  
52  
53 associated with higher mortality in patients with acute heart failure.<sup>10</sup> Kiris et al. reported that  
54  
55



1  
2  
3 elevated MLR level was independently associated with a higher risk of six-month mortality  
4  
5 in patients with STEMI undergoing primary PCI.<sup>11</sup> Thus, a high MLR was associated with  
6  
7 adverse cardiac clinical outcomes, though fewer studies have been performed for MLR and  
8  
9 cardiac prognosis, compared to those for NLR. Monocytes also play an essential role in every  
10  
11 stage of atherosclerosis, though numbers of monocytes are lower than that of neutrophils.<sup>28 29</sup>  
12  
13 They can recruit to the artery wall, differentiate into macrophages and stimulate activating the  
14  
15 secretion of pro-inflammatory cytokines.<sup>8</sup> And compared with neutrophils, monocytes can  
16  
17 produce higher levels of cytokines.<sup>30</sup> Moreover, recent pathological studies have found that  
18  
19 monocytes can replace neutrophils and become the prominent infiltrating leukocytes within  
20  
21 48 h after the onset of myocardial ischemia.<sup>31</sup> Therefore, MLR could be a potentially  
22  
23 prognostic factor for acute coronary syndrome, and the present study confirmed the  
24  
25 hypothesis. Our results revealed that MLR was an independent predictor of long-term MACE  
26  
27 and had comparable diagnostic ability as NLR for long-term MACE in patients with  
28  
29 NSTEMI undergoing primary PCI. Compared with STEMI, NSTEMI is much more common  
30  
31 and tends to have an increased mortality in the year following the myocardial infarction.<sup>32</sup>  
32  
33 Furthermore, we evaluated the combined usefulness of MLR and NLR for predicting  
34  
35 long-term MACE in patients with NSTEMI undergoing primary PCI. Our results showed that  
36  
37 the combination of MLR with NLR was an independent predictor, superior to individual  
38  
39 markers, in predicting the long-term MACE in patients with NSTEMI. Thus, it could be  
40  
41 concluded that the combined usefulness of MLR with NLR gains a prognostic value in  
42  
43 patients with NSTEMI, which could be used to identify the high risk patients with poor  
44  
45 outcomes and adjust their treatment accordingly. These findings provide a new perspective  
46  
47  
48  
49  
50  
51  
52  
53  
54  
55

1  
2  
3 on the non-invasive, simple, economical and feasible biomarkers, the combined usefulness of  
4  
5  
6 MLR and NLR, in predicting long-term adverse outcomes in patients with NSTEMI.  
7

8 In addition, our study found that hs-CRP and BNP were also independent predictors of  
9  
10 long-term MACE in patients with NSTEMI undergoing primary PCI. Hs-CRP and BNP were  
11  
12 classical biomarkers correlated with cardiovascular risk and prognosis. A recent  
13  
14 meta-analysis of 14 studies concluded that elevated hs-CRP could predict the risk of  
15  
16 cardiovascular mortality in the general population.<sup>33</sup> Cho KI et al. showed that an increased  
17  
18 hs-CRP level was a significant independent predictor of long-term adverse events in patients  
19  
20 with NSTEMI/unstable angina.<sup>14</sup> BNP has been established as a biomarker in vascular  
21  
22 diseases used for monitoring disease progression. Porapakham et al. performed a  
23  
24 meta-analysis of eight randomized clinical trials and indicated that BNP could be used for  
25  
26 guiding the treatment of chronic heart failure<sup>34</sup>, while Klok et al. conducted a meta-analysis  
27  
28 of 13 studies and revealed the prognostic value of BNP in patients with pulmonary  
29  
30 embolism.<sup>35</sup> In patients with NSTEMI, Fukazawa et al. showed that an increased  
31  
32 concentration of BNP at admission was closely associated with poor prognosis.<sup>36</sup> In our study,  
33  
34 multivariate COX regression analyses suggested that hs-CRP and BNP are independent  
35  
36 prognostic factors of long-term MACE in patients with NSTEMI undergoing primary PCI.  
37  
38 However, compared with hs-CRP and BNP, the combined usefulness of MLR and NLR was  
39  
40 a significant prognostic factor with higher HR. And the measurement of MLR and NLR  
41  
42 could be more cost-effectiveness and flexible in clinical practice, which possess practical  
43  
44 clinical utility in the prognosis prediction of NSTEMI.  
45  
46  
47  
48  
49  
50  
51  
52  
53

54 This study had several limitations. Firstly, this study comprised of a modest sample size

1  
2  
3 which may introduce selection bias. And the single center study was lack of external  
4 validation. Thus, these findings need further multi-institutional with larger samples validation.  
5  
6 Secondly, we evaluated the MLR and NLR on admission of the hospital, but didn't assess  
7 their dynamic changes during the follow-up period. Finally, inflammatory biomarkers such as  
8 myeloperoxidase, interleukin-6 and tumor necrosis factor were not analyzed in our patients.  
9  
10 Notwithstanding these limitations, this study firstly reported the prognostic value of the  
11 combination of MLR with NLR in patients with NSTEMI.  
12  
13  
14  
15  
16  
17  
18  
19

20 In conclusion, MLR and NLR, and especially their combination, were all independent  
21 predictors of long-term MACE in patients with NSTEMI who underwent primary PCI.  
22  
23 Moreover, the combined usefulness of MLR with NLR performed better than individual  
24 MLR or NLR in predicting long-term MACE in patients with NSTEMI who underwent  
25 primary PCI.  
26  
27  
28  
29  
30  
31  
32  
33  
34

35 **Contributors** ZF made the major contribution to the conception and design of the study, and  
36 drafted the manuscript. YL and HJ contributed to the data acquisition and performed the  
37 statistical analyses. XJ revised the manuscript. XJ is the guarantor of the study.  
38  
39

40 All authors read and approved the final manuscript prior to the submission.  
41  
42  
43

44 **Funding statement** This research received no specific grant from any funding agency in the  
45 public, commercial or not-for-profit sectors.  
46  
47  
48

49 **Competing interests** None declared.  
50  
51

52 **Ethics approval** This research was approved by the ethics committee of the Ethical  
53 Committee of Civil Aviation General Hospital.  
54  
55

**Data Sharing Statement** Raw data can be obtained by contacting the corresponding author.

## REFERENCES

1. Murtagh BM, Anderson HV. Inflammation and atherosclerosis in acute coronary syndromes. *J Invasive Cardiol* 2004;16(7):377-84.
2. Nahrendorf M, Swirski FK. Immunology. Neutrophil-macrophage communication in inflammation and atherosclerosis. *Science* 2015;349(6245):237-8. doi: 10.1126/science.aac7801
3. Horne BD, Anderson JL, John JM, et al. Which white blood cell subtypes predict increased cardiovascular risk? *J Am Coll Cardiol* 2005;45(10):1638-43. doi: 10.1016/j.jacc.2005.02.054
4. Arbel Y, Finkelstein A, Halkin A, et al. Neutrophil/lymphocyte ratio is related to the severity of coronary artery disease and clinical outcome in patients undergoing angiography. *Atherosclerosis* 2012;225(2):456-60. doi: 10.1016/j.atherosclerosis.2012.09.009 %/ Copyright (c) 2012 Elsevier Ireland Ltd. All rights reserved.
5. Gul M, Uyarel H, Ergelen M, et al. Predictive value of neutrophil to lymphocyte ratio in clinical outcomes of non-ST elevation myocardial infarction and unstable angina pectoris: a 3-year follow-up. *Clin Appl Thromb Hemost* 2014;20(4):378-84. doi: 10.1177/1076029612465669
6. Kurtul A, Yarlioglu M, Duran M, et al. Association of Neutrophil-to-lymphocyte Ratio with Contrast-induced Nephropathy in Patients with Non-ST-elevation Acute Coronary Syndrome Treated with Percutaneous Coronary Intervention. *Heart Lung Circ* 2016;25(7):683-90. doi: 10.1016/j.hlc.2016.01.007 %/ Copyright (c) 2016 Australian and New Zealand Society of Cardiac and Thoracic Surgeons (ANZSCTS) and the Cardiac Society of Australia and New Zealand (CSANZ). Published by Elsevier B.V. All rights reserved.
7. Azab B, Zaher M, Weiserbs KF, et al. Usefulness of neutrophil to lymphocyte ratio in predicting short- and long-term mortality after non-ST-elevation myocardial infarction. *Am J Cardiol* 2010;106(4):470-6. doi: 10.1016/j.amjcard.2010.03.062
8. Ley K, Miller YI, Hedrick CC. Monocyte and macrophage dynamics during atherogenesis. *Arterioscler Thromb Vasc Biol* 2011;31(7):1506-16. doi: 10.1161/atvbaha.110.221127
9. Ji H, Li Y, Fan Z, et al. Monocyte/lymphocyte ratio predicts the severity of coronary artery disease: a syntax score assessment. *BMC Cardiovasc Disord* 2017;17(1):90. doi: 10.1186/s12872-017-0507-4
10. Silva N, Bettencourt P, Guimaraes JT. The lymphocyte-to-monocyte ratio: an added value for death prediction in heart failure. *Nutr Metab Cardiovasc Dis* 2015;25(11):1033-40. doi: 10.1016/j.numecd.2015.07.004 %/ Copyright (c) 2015 The Italian Society of Diabetology, the Italian Society for the Study of Atherosclerosis, the Italian Society of Human Nutrition, and the Department of Clinical Medicine and Surgery, Federico II University. Published by Elsevier B.V. All rights reserved.
11. Kiris T, Celik A, Varis E, et al. Association of Lymphocyte-to-Monocyte Ratio With the

- 1  
2  
3 Mortality in Patients With ST-Elevation Myocardial Infarction Who Underwent  
4 Primary Percutaneous Coronary Intervention. *Angiology* 2017;3319716685480. doi:  
5 10.1177/0003319716685480  
6  
7 12. Cutlip DE, Windecker S, Mehran R, et al. Clinical end points in coronary stent trials: a  
8 case for standardized definitions. *Circulation* 2007;115(17):2344-51. doi:  
9 10.1161/circulationaha.106.685313  
10  
11 13. Paiva L, Providencia R, Barra S, et al. Universal definition of myocardial infarction:  
12 clinical insights. *Cardiology* 2015;131(1):13-21. doi: 10.1159/000371739 %/ (c) 2015  
13 S. Karger AG, Basel.  
14  
15 14. Cho KI, Ann SH, Singh GB, et al. Combined Usefulness of the Platelet-to-Lymphocyte  
16 Ratio and the Neutrophil-to-Lymphocyte Ratio in Predicting the Long-Term Adverse  
17 Events in Patients Who Have Undergone Percutaneous Coronary Intervention with a  
18 Drug-Eluting Stent. *PLoS One* 2015;10(7):e0133934. doi:  
19 10.1371/journal.pone.0133934  
20  
21 15. Park JJ, Jang HJ, Oh IY, et al. Prognostic value of neutrophil to lymphocyte ratio in  
22 patients presenting with ST-elevation myocardial infarction undergoing primary  
23 percutaneous coronary intervention. *Am J Cardiol* 2013;111(5):636-42. doi:  
24 10.1016/j.amjcard.2012.11.012 %/ Copyright (c) 2013 Elsevier Inc. All rights  
25 reserved.  
26  
27 16. Sawant AC, Adhikari P, Narra SR, et al. Neutrophil to lymphocyte ratio predicts short-  
28 and long-term mortality following revascularization therapy for ST elevation  
29 myocardial infarction. *Cardiol J* 2014;21(5):500-8. doi: 10.5603/CJ.a2013.0148  
30  
31 17. Amulic B, Cazalet C, Hayes GL, et al. Neutrophil function: from mechanisms to disease.  
32 *Annu Rev Immunol* 2012;30:459-89. doi: 10.1146/annurev-immunol-020711-074942  
33  
34 18. Strydom N, Rankin SM. Regulation of circulating neutrophil numbers under homeostasis  
35 and in disease. *J Innate Immun* 2013;5(4):304-14. doi: 10.1159/000350282 %/  
36 Copyright (c) 2013 S. Karger AG, Basel.  
37  
38 19. Naruko T, Ueda M, Haze K, et al. Neutrophil infiltration of culprit lesions in acute  
39 coronary syndromes. *Circulation* 2002;106(23):2894-900.  
40  
41 20. Abou-Raya A, Abou-Raya S. Inflammation: a pivotal link between autoimmune diseases  
42 and atherosclerosis. *Autoimmun Rev* 2006;5(5):331-7. doi:  
43 10.1016/j.autrev.2005.12.006  
44  
45 21. Iadecola C, Anrather J. The immunology of stroke: from mechanisms to translation. *Nat*  
46 *Med* 2011;17(7):796-808. doi: 10.1038/nm.2399  
47  
48 22. Soehnlein O. Multiple roles for neutrophils in atherosclerosis. *Circ Res*  
49 2012;110(6):875-88. doi: 10.1161/circresaha.111.257535  
50  
51 23. Blum A. Role of lymphocytes in heart disease. *Circulation* 1998;98(15):1590.  
52  
53 24. Tang TT, Yuan J, Zhu ZF, et al. Regulatory T cells ameliorate cardiac remodeling after  
54 myocardial infarction. *Basic Res Cardiol* 2012;107(1):232. doi:  
55 10.1007/s00395-011-0232-6  
56  
57 25. Nishijima TF, Muss HB, Shachar SS, et al. Prognostic value of lymphocyte-to-monocyte  
58 ratio in patients with solid tumors: A systematic review and meta-analysis. *Cancer*  
59 *Treat Rev* 2015;41(10):971-8. doi: 10.1016/j.ctrv.2015.10.003 %/ Copyright (c) 2015

- Elsevier Ltd. All rights reserved.
26. Gu L, Li H, Chen L, et al. Prognostic role of lymphocyte to monocyte ratio for patients with cancer: evidence from a systematic review and meta-analysis. *Oncotarget* 2016;7(22):31926-42. doi: 10.18632/oncotarget.7876
  27. Fan Z, Ji H, Li Y, et al. Relationship between monocyte-to-lymphocyte ratio and coronary plaque vulnerability in patients with stable angina. *Biomarkers in medicine* 2017;11(11):979-90. doi: 10.2217/bmm-2017-0235
  28. Woollard KJ, Geissmann F. Monocytes in atherosclerosis: subsets and functions. *Nat Rev Cardiol* 2010;7(2):77-86. doi: 10.1038/nrcardio.2009.228
  29. Auffray C, Sieweke MH, Geissmann F. Blood monocytes: development, heterogeneity, and relationship with dendritic cells. *Annu Rev Immunol* 2009;27:669-92. doi: 10.1146/annurev.immunol.021908.132557
  30. Ramsay SC, Maggs JA, Ketheesan N, et al. Relative uptake of technetium 99m stannous colloid by neutrophils and monocytes is altered by gram-negative infection. *Nuclear medicine and biology* 2005;32(1):101-07.
  31. Freytes DO, Santambrogio L, Vunjak-Novakovic G. Optimizing dynamic interactions between a cardiac patch and inflammatory host cells. *Cells Tissues Organs* 2012;195(1-2):171-82.
  32. Fine DH. Methods for diagnosing and treating a heart condition in a patient: Google Patents %\ 2017-08-26 22:07:00, 2009.
  33. Li Y, Zhong X, Cheng G, et al. Hs-CRP and all-cause, cardiovascular, and cancer mortality risk: A meta-analysis. *Atherosclerosis* 2017;259:75-82. doi: 10.1016/j.atherosclerosis.2017.02.003 %/ Copyright (c) 2017 Elsevier B.V. All rights reserved.
  34. Porapakkham P, Porapakkham P, Zimet H, et al. B-type natriuretic peptide-guided heart failure therapy: A meta-analysis. *Arch Intern Med* 2010;170(6):507-14. doi: 10.1001/archinternmed.2010.35
  35. Klok FA, Mos IC, Huisman MV. Brain-type natriuretic peptide levels in the prediction of adverse outcome in patients with pulmonary embolism: a systematic review and meta-analysis. *Am J Respir Crit Care Med* 2008;178(4):425-30. doi: 10.1164/rccm.200803-459OC
  36. Fukazawa S, Teruya K, Uemura T, et al. The relationship between long-term changes in plasma B-type natriuretic peptide levels and electrocardiographic findings. *Environ Health Prev Med* 2008;13(3):156-61. doi: 10.1007/s12199-008-0027-z

## Figure Legend

**Figure 1.** Flow Chart of the study cohort. The flow chart presents the selection criteria of the study and the clinical layout of the study population.

**Figure 2.** Kaplan-Meier cumulative MACE-free curves in patients with NSTEMI (A)

1  
2  
3 according to the cut-off value of MLR; (B) according to the cut-off value of NLR; (C)  
4  
5  
6 according to MLR combined with NLR.  
7

8 **Figure 3.** Receiver-operating characteristic curves identifying the discrimination thresholds  
9  
10 of MLR, NLR, and the combination of MLR and NLR (MLR+NLR) for the prediction of  
11  
12 long-term MACE.  
13  
14  
15  
16  
17  
18  
19  
20  
21  
22  
23  
24  
25  
26  
27  
28  
29  
30  
31  
32  
33  
34  
35  
36  
37  
38  
39  
40  
41  
42  
43  
44  
45  
46  
47  
48  
49  
50  
51  
52  
53  
54  
55  
56  
57  
58  
59  
60

For peer review only

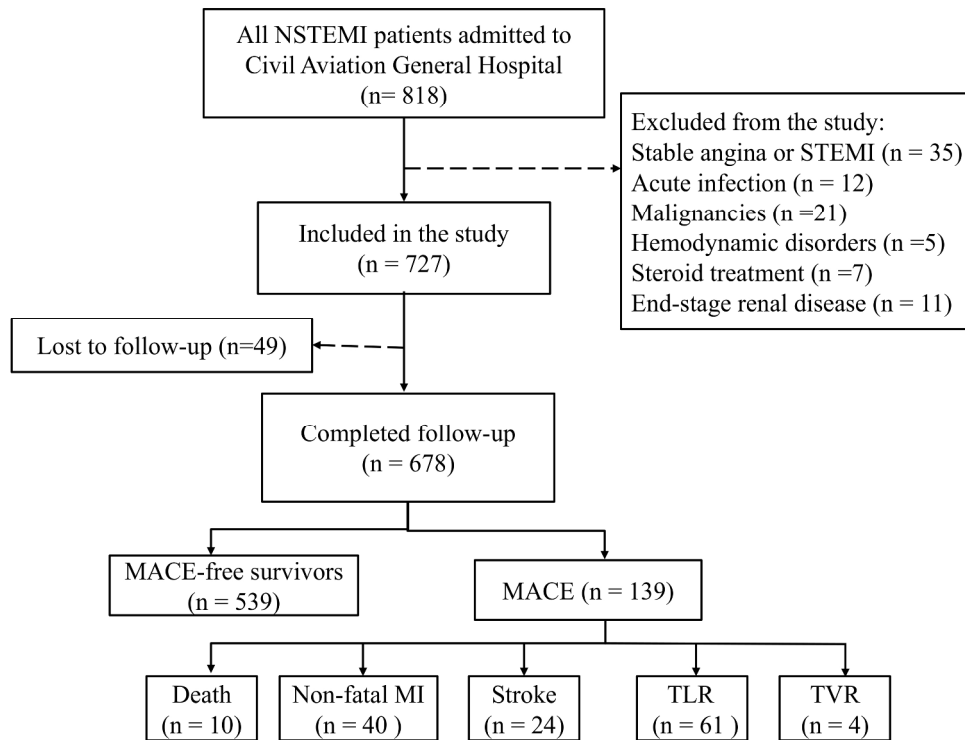

Figure 1. Flow Chart of the study cohort. The flow chart presents the selection criteria of the study and the clinical layout of the study population.

254x190mm (300 x 300 DPI)



1  
2  
3  
4  
5  
6  
7  
8  
9  
10  
11  
12  
13  
14  
15  
16  
17  
18  
19  
20  
21  
22  
23  
24  
25  
26  
27  
28  
29  
30  
31  
32  
33  
34  
35  
36  
37  
38  
39  
40  
41  
42  
43  
44  
45  
46  
47  
48  
49  
50  
51  
52  
53  
54  
55  
56  
57  
58  
59  
60

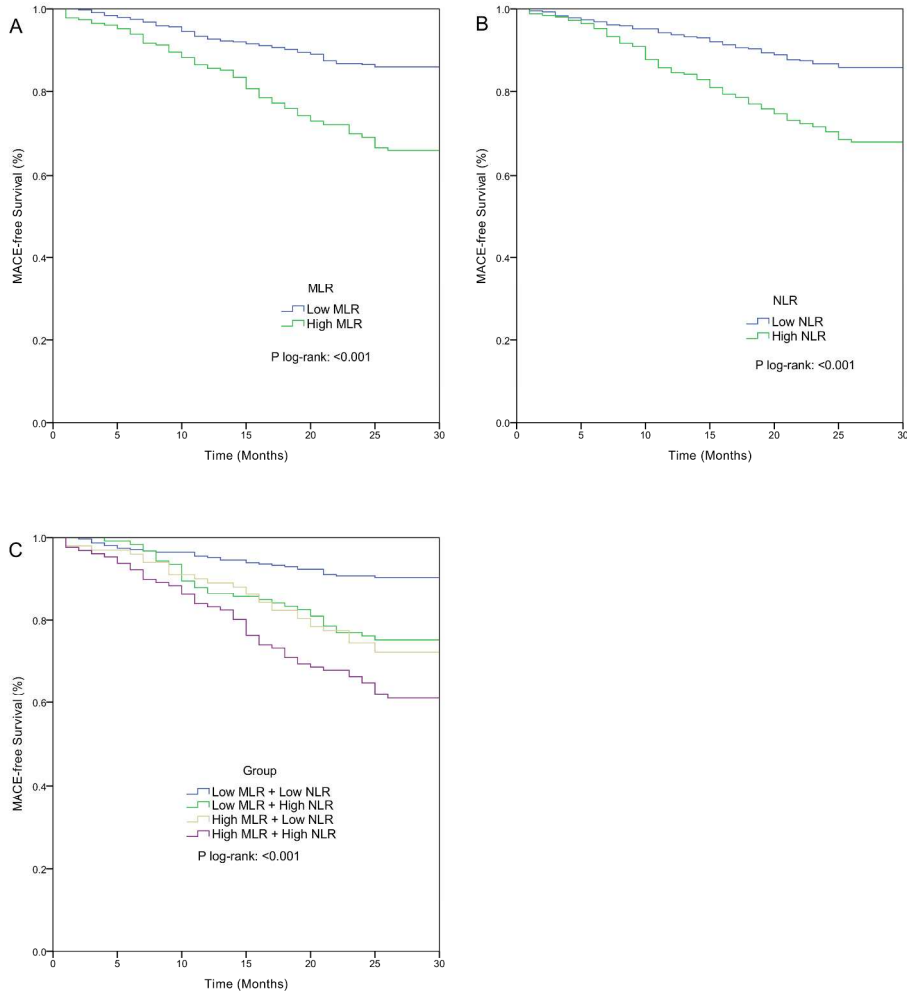

Figure 2. Kaplan-Meier cumulative MACE-free curves in patients with NSTEMI (A) according to the cut-off value of MLR; (B) according to the cut-off value of NLR; (C) according to MLR combined with NLR.

282x289mm (300 x 300 DPI)

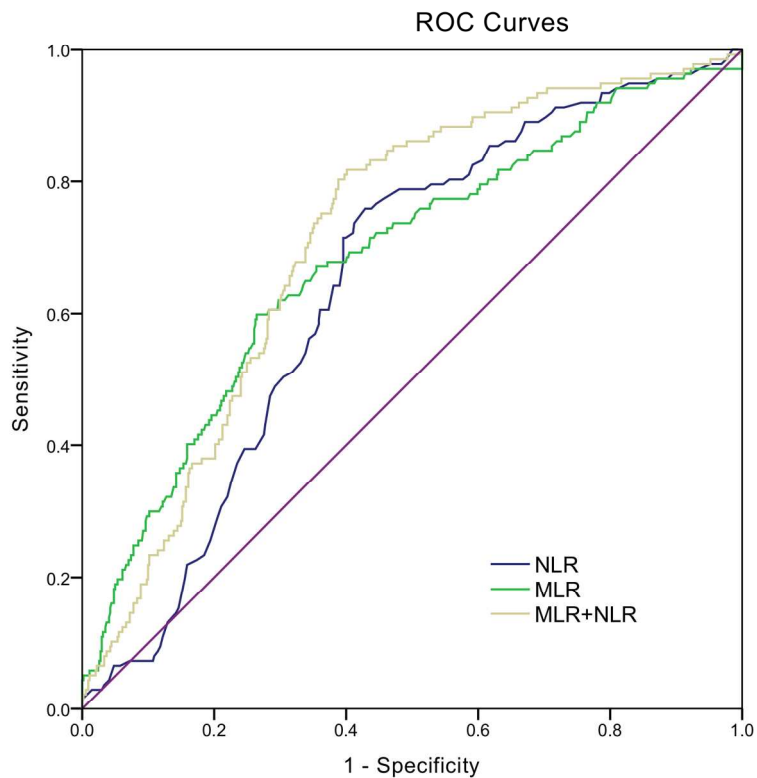

| Variable | AUC   | SE <sup>a</sup> | 95% CI <sup>b</sup> | P value |
|----------|-------|-----------------|---------------------|---------|
| MLR      | 0.683 | 0.0264          | 0.647 - 0.718       | <0.001  |
| NLR      | 0.646 | 0.0242          | 0.609 - 0.682       | <0.001  |
| MLR+NLR  | 0.715 | 0.0229          | 0.679 - 0.748       | <0.001  |

<sup>a</sup> DeLong et al., 1988

<sup>b</sup> Binomia exact

Figure 3. Receiver-operating characteristic curves identifying the discrimination thresholds of MLR, NLR, and the combination of MLR and NLR (MLR+NLR) for the prediction of long-term MACE.

152x194mm (300 x 300 DPI)

**STROBE 2007 (v4) Statement—Checklist of items that should be included in reports of cohort studies**

| Section/Topic             | Item # | Recommendation                                                                                                                                                                       | Reported on page # |
|---------------------------|--------|--------------------------------------------------------------------------------------------------------------------------------------------------------------------------------------|--------------------|
| Title and abstract        | 1      | (a) Indicate the study’s design with a commonly used term in the title or the abstract                                                                                               | 1,2                |
|                           |        | (b) Provide in the abstract an informative and balanced summary of what was done and what was found                                                                                  | 2                  |
| <b>Introduction</b>       |        |                                                                                                                                                                                      |                    |
| Background/rationale      | 2      | Explain the scientific background and rationale for the investigation being reported                                                                                                 | 4                  |
| Objectives                | 3      | State specific objectives, including any prespecified hypotheses                                                                                                                     | 4                  |
| <b>Methods</b>            |        |                                                                                                                                                                                      |                    |
| Study design              | 4      | Present key elements of study design early in the paper                                                                                                                              | 5                  |
| Setting                   | 5      | Describe the setting, locations, and relevant dates, including periods of recruitment, exposure, follow-up, and data collection                                                      | 5                  |
| Participants              | 6      | (a) Give the eligibility criteria, and the sources and methods of selection of participants. Describe methods of follow-up                                                           | 6-7                |
|                           |        | (b) For matched studies, give matching criteria and number of exposed and unexposed                                                                                                  | Not applicable     |
| Variables                 | 7      | Clearly define all outcomes, exposures, predictors, potential confounders, and effect modifiers. Give diagnostic criteria, if applicable                                             | 6-7                |
| Data sources/ measurement | 8*     | For each variable of interest, give sources of data and details of methods of assessment (measurement). Describe comparability of assessment methods if there is more than one group | 6                  |
| Bias                      | 9      | Describe any efforts to address potential sources of bias                                                                                                                            | 7                  |
| Study size                | 10     | Explain how the study size was arrived at                                                                                                                                            | 5                  |
| Quantitative variables    | 11     | Explain how quantitative variables were handled in the analyses. If applicable, describe which groupings were chosen and why                                                         | 6                  |
| Statistical methods       | 12     | (a) Describe all statistical methods, including those used to control for confounding                                                                                                | 7                  |
|                           |        | (b) Describe any methods used to examine subgroups and interactions                                                                                                                  | 7                  |
|                           |        | (c) Explain how missing data were addressed                                                                                                                                          | 7                  |
|                           |        | (d) If applicable, explain how loss to follow-up was addressed                                                                                                                       | 7                  |
|                           |        | (e) Describe any sensitivity analyses                                                                                                                                                | 7                  |
| <b>Results</b>            |        |                                                                                                                                                                                      |                    |

|                          |     |                                                                                                                                                                                                              |             |
|--------------------------|-----|--------------------------------------------------------------------------------------------------------------------------------------------------------------------------------------------------------------|-------------|
| Participants             | 13* | (a) Report numbers of individuals at each stage of study—eg numbers potentially eligible, examined for eligibility, confirmed eligible, included in the study, completing follow-up, and analysed            | 8           |
|                          |     | (b) Give reasons for non-participation at each stage                                                                                                                                                         | 8           |
|                          |     | (c) Consider use of a flow diagram                                                                                                                                                                           | 8, Figure 1 |
| Descriptive data         | 14* | (a) Give characteristics of study participants (eg demographic, clinical, social) and information on exposures and potential confounders                                                                     | 8-10        |
|                          |     | (b) Indicate number of participants with missing data for each variable of interest                                                                                                                          | 8           |
|                          |     | (c) Summarise follow-up time (eg, average and total amount)                                                                                                                                                  | 8           |
| Outcome data             | 15* | Report numbers of outcome events or summary measures over time                                                                                                                                               | 10-11       |
| Main results             | 16  | (a) Give unadjusted estimates and, if applicable, confounder-adjusted estimates and their precision (eg, 95% confidence interval). Make clear which confounders were adjusted for and why they were included | 11-12       |
|                          |     | (b) Report category boundaries when continuous variables were categorized                                                                                                                                    | 8           |
|                          |     | (c) If relevant, consider translating estimates of relative risk into absolute risk for a meaningful time period                                                                                             | 11-12       |
| Other analyses           | 17  | Report other analyses done—eg analyses of subgroups and interactions, and sensitivity analyses                                                                                                               | 13          |
| <b>Discussion</b>        |     |                                                                                                                                                                                                              |             |
| Key results              | 18  | Summarise key results with reference to study objectives                                                                                                                                                     | 13          |
| <b>Limitations</b>       |     |                                                                                                                                                                                                              |             |
| Interpretation           | 20  | Give a cautious overall interpretation of results considering objectives, limitations, multiplicity of analyses, results from similar studies, and other relevant evidence                                   | 16-17       |
| Generalisability         | 21  | Discuss the generalisability (external validity) of the study results                                                                                                                                        | 17          |
| <b>Other information</b> |     |                                                                                                                                                                                                              |             |
| Funding                  | 22  | Give the source of funding and the role of the funders for the present study and, if applicable, for the original study on which the present article is based                                                | 17          |

\*Give information separately for cases and controls in case-control studies and, if applicable, for exposed and unexposed groups in cohort and cross-sectional studies.

**Note:** An Explanation and Elaboration article discusses each checklist item and gives methodological background and published examples of transparent reporting. The STROBE checklist is best used in conjunction with this article (freely available on the Web sites of PLoS Medicine at <http://www.plosmedicine.org/>, Annals of Internal Medicine at <http://www.annals.org/>, and Epidemiology at <http://www.epidem.com/>). Information on the STROBE Initiative is available at [www.strobe-statement.org](http://www.strobe-statement.org).

# BMJ Open

## Prognostic utility of the combination of monocyte-to-lymphocyte ratio and neutrophil-to-lymphocyte ratio in patients with NSTEMI after primary percutaneous coronary intervention: a retrospective cohort study

|                                 |                                                                                                                                                                                           |
|---------------------------------|-------------------------------------------------------------------------------------------------------------------------------------------------------------------------------------------|
| Journal:                        | <i>BMJ Open</i>                                                                                                                                                                           |
| Manuscript ID                   | bmjopen-2018-023459.R1                                                                                                                                                                    |
| Article Type:                   | Research                                                                                                                                                                                  |
| Date Submitted by the Author:   | 05-Jul-2018                                                                                                                                                                               |
| Complete List of Authors:       | Fan, Zeyuan; Civil Aviation General Hospital<br>Li, Yang; Civil Aviation General Hospital<br>Ji, Hanhua; Civil Aviation General Hospital<br>Jian, Xinwen; Civil Aviation General Hospital |
| <b>Primary Subject Heading</b>: | Cardiovascular medicine                                                                                                                                                                   |
| Secondary Subject Heading:      | Cardiovascular medicine                                                                                                                                                                   |
| Keywords:                       | Monocyte-to-lymphocyte ratio, Neutrophil-to-lymphocyte ratio, Major adverse cardiac events, Non-ST elevated myocardial infarction                                                         |
|                                 |                                                                                                                                                                                           |

SCHOLARONE™  
Manuscripts

1  
2  
3 **Prognostic utility of the combination of monocyte-to-lymphocyte ratio and**  
4 **neutrophil-to-lymphocyte ratio in patients with NSTEMI after primary percutaneous**  
5 **coronary intervention: a retrospective cohort study**  
6  
7  
8  
9

10  
11  
12 Zeyuan Fan<sup>1</sup>, Yang Li<sup>1</sup>, Hanhua Ji<sup>1</sup>, Xinwen Jian<sup>1</sup>

13  
14 <sup>1</sup>Department of Cardiovascular Diseases, Civil Aviation General Hospital, Civil Aviation  
15 Clinical Medical College of Peking University, Beijing, China.  
16

17  
18  
19 **Corresponding Author**

20 Xinwen Jian

21 Postal address: No.1 Gaojingjia, Chaoyang District, Beijing 100125, China.

22 Tel: +8615201277863; E-mail: jianxw\_mhzyy@163.com.  
23  
24  
25

26 **WORD COUNT 3105**  
27  
28  
29  
30  
31  
32  
33  
34  
35  
36  
37  
38  
39  
40  
41  
42  
43  
44  
45  
46  
47  
48  
49  
50  
51  
52  
53  
54  
55  
56  
57  
58  
59  
60

## ABSTRACT

**Objectives** This study aimed to evaluate prognostic value of the combination of monocyte-to-lymphocyte ratio (MLR) with neutrophil-to-lymphocyte ratio (NLR) for predicting long-term major adverse cardiac events (MACE) in patients with non-ST elevated myocardial infarction (NSTEMI) who underwent primary percutaneous coronary intervention (PCI).

**Design** Retrospective cohort study.

**Setting** Civil Aviation General Hospital, Beijing, China.

**Participants** 678 patients with NSTEMI undergoing primary PCI between July 2010 and July 2015 were enrolled.

**Main outcome measures** The main outcomes were MACE. The cumulative MACE-free survival rates were calculated by Kaplan-Meier analysis and the independent predictors of MACE were assessed by COX regression analysis.

**Results** According to the cut-off values of MLR 0.36 and NLR 2.15, the study population was classified into four groups: low MLR + low NLR group (n = 319), low MLR + high NLR group (n = 126), high MLR + low NLR group (n = 102), and high MLR + high NLR group (n = 131). High MLR + high NLR group had lower MACE-free survival rate than the other three groups (P log-rank < 0.001). Both MLR [hazard ratio (HR): 2.128, 95% CI: 1.458-3.105] and NLR (HR: 1.925, 95% CI: 1.385-2.676) were independent predictors of long-term MACE. Moreover, the patients in high-MLR + high-NLR group had a HR of 4.055 (95% CI: 2.550-6.448) for long-term MACE, with low-MLR + low-NLR group as reference.

Comparisons of ROC curves revealed that the combination of MLR with NLR achieved

1  
2  
3 better performance in differentiating long-term MACE, compared with MLR, NLR, hs-CRP  
4 and BNP alone, and had similar performance to all other pairwise combinations of the four  
5  
6  
7  
8 biomarkers.  
9

10 **Conclusions** Elevated levels of MLR and NLR were independent predictors of long-term  
11  
12 MACE in patients with NSTEMI. Moreover, the combination of MLR and NLR could  
13  
14 improve the prognostic value in predicting long-term MACE.  
15  
16

### 17 **Keywords**

18  
19 Monocyte-to-lymphocyte ratio; Neutrophil-to-lymphocyte ratio; Major adverse cardiac  
20  
21 events; Non-ST elevated myocardial infarction  
22  
23  
24

### 25 **Strengths and limitations of this study**

- 26  
27  
28 • This is the first study to report the use of monocyte-to-lymphocyte ratio (MLR) in  
29  
30 combination with neutrophil-to-lymphocyte ratio (NLR) to predict long-term major  
31  
32 adverse cardiac events (MACE) in patients with non-ST elevated myocardial infarction  
33  
34 (NSTEMI) undergoing primary percutaneous coronary intervention (PCI).  
35  
36
- 37  
38 • MLR in combination with NLR, has good performance in prognosis prediction in  
39  
40 patients with NSTEMI undergoing primary PCI, through a comparison with (i) MLR,  
41  
42 NLR, hs-CRP and BNP alone, and (ii) all other pairwise combinations of the four  
43  
44 biomarkers.  
45  
46
- 47  
48 • MLR and NLR, non-invasive, simple, economical and feasible biomarkers, possess  
49  
50 practical clinical utility in the prognosis prediction of NSTEMI.  
51  
52
- 53  
54 • These findings need further multi-institutional with larger samples validation.  
55  
56



## INTRODUCTION

Previous studies have verified that inflammatory response plays a vital role in the development of atherosclerosis and cardiovascular diseases.<sup>1 2</sup> White blood cell and its subtypes including neutrophils, monocytes and lymphocytes are important immune cells involved in the initiation, formation and destabilization of atherosclerosis.<sup>3</sup> Neutrophil-to-lymphocyte ratio (NLR) has been established as a cost-effective, feasible and reproducible inflammatory biomarker in many cardiovascular disorders, including acute coronary syndrome (ACS), angina pectoris and heart failure.<sup>4-6</sup> Elevated NLR has been reported as an independent predictor of major adverse cardiac events (MACE) in patients with ACS.<sup>7</sup> Monocytes can recruit to the artery wall, differentiate into macrophages and stimulate the activation of pro-inflammatory cytokines which play a crucial role at every level of the atherosclerotic process.<sup>8</sup> Monocyte-to-lymphocyte ratio (MLR) has emerged as a novel systematic inflammatory marker related with increased cardiovascular risk.<sup>9</sup> Recently, MLR has been reported to be associated with adverse clinical outcomes in various cardiovascular diseases.<sup>10-12</sup> However, the prognostic value of the combined usefulness of MLR and NLR in NSTEMI has not been evaluated. The aim of the present study was to investigate the combined usefulness of MLR and NLR in predicting MACE in patients with NSTEMI who underwent primary percutaneous coronary intervention (PCI).

## MATERIALS AND METHODS

### Study design, setting and participants

This retrospective longitudinal study was performed in Civil Aviation General Hospital,

1  
2  
3 Beijing, China. A total of 818 consecutive NSTEMI patients who presented to the emergency  
4 department and underwent primary PCI from July 2010 to July 2015 were considered for  
5 participation in this study. The NSTEMI was defined by typical ischemia symptoms,  
6 elevation level of cardiac troponin-I or creatine kinase-MB and no evidence of ST segment  
7 elevation in electrocardiography. We excluded patients who had serious heart failure (NYHA  
8 Class III or IV), rheumatic heart disease, valvar heart disease, congenital heart disease,  
9 pulmonary heart disease, active or chronic inflammatory conditions, acute infection,  
10 hemodynamic disorders, malignancies, severe renal [estimated glomerular filtration rate  
11 (eGFR) < 30 ml/min/1.73m<sup>2</sup>] or hepatic (alanine-aminotransferase > 40 U/l) disease, steroid  
12 therapy in the preceding 3 months, history of cerebrovascular vascular events or incomplete  
13 blood cell count or medical records. Hypertension was defined as current use of an  
14 antihypertensive medication or, a systolic blood pressure  $\geq$  140 mmHg and/or a diastolic  
15 blood pressure  $\geq$  90 mmHg. Diabetes mellitus was defined as active use of an antidiabetic  
16 agent, or fasting plasma glucose level  $\geq$  7.0 mmol/L or casual plasma glucose level  $\geq$  11.1  
17 mmol/L.

18  
19  
20  
21  
22  
23  
24  
25  
26  
27  
28  
29  
30  
31  
32  
33  
34  
35  
36  
37  
38  
39  
40 This research was approved by the Ethical Committee of Civil Aviation General  
41 Hospital (CAGH-EC100201), and informed consent was obtained from all patients. The  
42 study was designed and performed in accordance with the Declaration of Helsinki.

#### 43 44 45 46 47 48 **Study procedures and laboratory analysis**

49  
50  
51  
52 At the time of admission, venous blood samples were collected from each patient. All  
53 hematological and biochemical analyses were performed on fresh whole blood/plasma.

1  
2  
3 Plasma was obtained by centrifuging whole blood samples at 3000 rpm for 5 min. Complete  
4  
5  
6 blood counts and biochemical indicators were measured by the core laboratory of Civil  
7  
8  
9 Aviation General Hospital. Complete blood counts were performed using a SYSMEX  
10  
11 XE-2100 automated cell counter (Sysmex Corporation, Kobe, Japan). Complete blood counts  
12  
13 included hemoglobin, white blood cells, neutrophils, monocytes, lymphocytes, and platelets.  
14  
15 The biochemical indicators were determined using a Hitachi7600 automatic biochemistry  
16  
17 analyzer (Hitachi, Tokyo, Japan).The biochemical indicators included total cholesterol,  
18  
19 triglycerides, creatinine, low density lipoprotein (LDL), high density lipoprotein (HDL),  
20  
21 creatinine, high-sensitivity C-reactive protein (hs-CRP) , brain natriuretic peptide (BNP), and  
22  
23 Troponin I. eGFR was calculated using the Chronic Kidney Disease Epidemiology (CKD EPI)  
24  
25 creatinine equation. The MLR was calculated as the ratio of monocyte counts to lymphocyte  
26  
27 counts, and NLR was calculated as the ratio of neutrophil counts to lymphocyte counts.  
28  
29  
30  
31

32  
33 All patients received a loading dose of aspirin (300 mg) and clopidogrel (300 mg) at  
34  
35 least 6 hours before PCI, and an intravenous dose of heparin (70 to 100 U/kg) to maintain an  
36  
37 activated clotting time 250-300 seconds during the procedure. Primary PCI was performed  
38  
39 according to standard clinical practice by experienced cardiologists. A successful PCI was  
40  
41 defined as a residual stenosis less than 30% and final thrombolysis in myocardial infarction  
42  
43 (TIMI) II or III flow in the treated artery. Angiographic characteristics were collected for all  
44  
45 the patients.  
46  
47  
48  
49

### 50 51 **Clinical outcomes**

52  
53  
54 The main outcomes were MACE happened in-hospital and during the follow-up period,  
55

1  
2  
3 which were defined as a composite of all-cause mortality, cardiac death, stroke, non-fatal MI,  
4 target lesion revascularization (TLR) and target vessel revascularization (TVR) according to  
5 the Academic Research Consortium definition.<sup>13</sup> Cardiac death was defined as death resulting  
6 from any cardiac-related causes (eg, MI, heart failure, lethally cardiac arrhythmia). Nonfatal  
7 MI was defined based on the European Society of Cardiology, American Heart Association,  
8 American College of Cardiology, and World Heart Federation definitions.<sup>14</sup> TLR was defined  
9 as a repeat revascularization caused by a stenosis  $\geq 50\%$  within the stent or within a 5-mm  
10 proximal or distal to the stent. TVR was defined as a repeat coronary angioplasty or surgical  
11 bypass performed within the coronary artery containing the target lesion. Follow-up data  
12 were obtained by review of electronic medical records and/or telephone interview with the  
13 patients or patients' primary caregiver.

### 31 **Statistical analysis**

32 Kolmogorov-Smirnov test was employed to test the normality of the continuous variables in  
33 each group. Continuous variables distributed normally were expressed as mean  $\pm$  standard  
34 deviation (SD), while categorical data were expressed as numbers and percentage. We  
35 initially used ROC curves to determine the ability of MLR and NLR to differentiate MACE.  
36 Subsequently optimal cut-off values, specificity and sensitivity were derived. Based on the  
37 optimal cut-off values, participants were assigned into four groups: low MLR + low NLR  
38 group, low-MLR + high-NLR group, high-MLR + low-NLR group and high-MLR +  
39 high-NLR group. Continuous data differences between the four groups were compared using  
40 one-way ANOVA followed by Tukey's post hoc tests, while categorical data were compared

1  
2  
3 by Chi square tests. The MACE-free survival rates according to the cut-off values of MLR  
4  
5 and NLR were estimated by the Kaplan-Meier analysis and statistical differences were  
6  
7 carried out using the Log-rank test. Univariate and multivariate COX regression analyses  
8  
9 were carried out to identify the independent predictors of MACE. Variables with  $P < 0.10$  in  
10  
11 univariate analysis were selected for multivariate COX regression analysis. We constructed  
12  
13 two COX regression models (Model 1 and Model 2) with MACE as the dependent variable to  
14  
15 investigate the efficacy of MLR and NLR in predicting MACE. Model 1 was to estimate the  
16  
17 hazard ratio (HR) of MLR [low MLR = 0 (reference category), high MLR =1] and NLR [low  
18  
19 NLR =0 (reference category), high NLR =1] for MACE. Model 2 was to estimate the HR of  
20  
21 MLR in combination with NLR for MACE [low MLR + low NLR = 0 (reference category),  
22  
23 low-MLR + high-NLR = 1, high-MLR + low-NLR = 2, high-MLR + high-NLR group = 3].  
24  
25 The effect sizes were expressed as HR and their 95% confidence intervals (CI). Afterwards,  
26  
27 we used ROC curves to evaluate the diagnostic performance of individual biomarkers and  
28  
29 their pairwise combinations in predicting long-term MACE. The AUCs were compared by  
30  
31 Delong's tests. The statistical significance was considered as a 2-tailed  $P < 0.05$ . Statistical  
32  
33 analyses were performed using SPSS version 22.0 (SPSS Inc., Chicago, IL, USA).  
34  
35  
36  
37  
38  
39  
40  
41  
42

### 43 **Patient and Public Involvement**

44  
45 Patients and public were not involved in the design, recruitment, or conduct of this study.

46  
47 There is no plan for the study results to be disseminated directly to participants.

## 48 **RESULTS**

49  
50 818 patients were screened for inclusion for this study, while 91(11.12%) patients were

1  
2  
3 excluded because of the exclusion criteria and 49 (6.00%) patients were lost to the follow-up.  
4  
5  
6 Therefore, a total of 678 (82.89%) patients were included into the analysis, and the median  
7  
8 follow-up period was 26 (range: 1-30) months. **Figure 1** depicted the clinical layout of the  
9  
10  
11 study cohort.

### 12 13 14 15 **Baseline clinical characteristics**

16  
17  
18 A MLR cut-off value of 0.36 had a sensitivity of 54.74% and a specificity of 73.57%, while a  
19  
20 NLR cut-off value of 2.35 had a sensitivity of 77.37% and a specificity of 55.08% for  
21  
22 differentiating long-term MACE, via ROC analyses. According to the optimal cut-off values  
23  
24 of MLR 0.36 and NLR 2.35, participants were classified into four groups: low-MLR +  
25  
26 low-NLR group (MLR < 0.36, NLR < 2.35, n=319), low-MLR + high-NLR group (MLR <  
27  
28 0.36, NLR  $\geq$  2.35, n=126), high-MLR + low-NLR group (MLR  $\geq$  0.36, NLR < 2.35, n=102)  
29  
30 and high-MLR + high-NLR group (MLR  $\geq$  0.36, NLR  $\geq$  2.35, n=131). The clinical  
31  
32 characteristics were summarized in **Table 1**. The distribution of prior medications and  
33  
34 angiographic findings were similar between the four groups. However, patients in high-MLR  
35  
36 + high-NLR group were older, with higher Killip class and lower ejection fraction, and  
37  
38 showed higher levels of white blood cells, monocytes, neutrophils, LDL, hs-CRP ,BNP and  
39  
40 Troponin I, whereas they had lower levels of lymphocytes and hemoglobin.  
41  
42  
43  
44  
45  
46  
47

48  
49 **Table 1 Baseline clinical characteristics between the four groups based on the cut-off values of MLR and**  
50 **NLR**  
51

| Variable                           | Low-MLR      | Low-MLR       | High-MLR                   | High-MLR                    | P-value |
|------------------------------------|--------------|---------------|----------------------------|-----------------------------|---------|
|                                    | +            | +             | +                          | +                           |         |
|                                    | Low-NLR      | High-NLR      | Low-NLR                    | High-NLR                    |         |
|                                    | (n=319)      | (n=126)       | (n=102)                    | (n=131)                     |         |
| Age /(year)                        | 61.10±14.38  | 63.63±15.05   | 64.05±15.15                | 65.23±16.34*                | 0.036   |
| Male, n (%)                        | 209(65.52)   | 71(56.35)     | 65(63.73)                  | 90(68.70)                   | 0.188   |
| Family history, n (%)              | 33(10.34)    | 17(13.49)     | 11(10.78)                  | 20(15.27)                   | 0.463   |
| Hypertension, n(%)                 | 221(69.28)   | 86(68.25)     | 73(71.57)                  | 105(80.15)                  | 0.100   |
| Diabetes Mellitus, n(%)            | 125(39.18)   | 56(44.44)     | 39(38.24)                  | 59(45.04)                   | 0.522   |
| Dyslipidemia, n (%)                | 114(35.74)   | 51(40.48)     | 35(34.31)                  | 49(37.40)                   | 0.758   |
| Current Smoker, n (%)              | 108(33.86)   | 45(35.71)     | 33(32.35)                  | 51(38.93)                   | 0.702   |
| Killip class (> I)                 | 192(60.19)   | 86(68.25)     | 69(67.65)                  | 99(75.57)*                  | 0.015   |
| Ejection fraction (%)              | 65.80±10.05  | 66.52±10.11   | 65.26±10.23                | 62.98±10.01*                | 0.044   |
| <b>Laboratory parameters</b>       |              |               |                            |                             |         |
| White blood cell, ×10 <sup>9</sup> | 6.67±1.72    | 6.77±2.03     | 7.06±1.98*                 | 7.25±2.11*                  | 0.027   |
| Neutrophil, ×10 <sup>9</sup>       | 4.26±1.07    | 4.69±1.19*    | 4.56±1.15*                 | 5.08±1.27* <sup>##</sup>    | <0.001  |
| Lymphocyte, ×10 <sup>9</sup>       | 2.31±0.53    | 1.98±0.51*    | 2.37±0.67 <sup>+</sup>     | 2.02±0.64* <sup>##</sup>    | <0.001  |
| Monocyte, ×10 <sup>9</sup>         | 0.18±0.09    | 0.22±0.11*    | 0.49±0.19* <sup>+</sup>    | 0.46±0.13* <sup>+</sup>     | <0.001  |
| Hemoglobin/(g/L)                   | 136.7±30.38  | 129.6±27.57*  | 133.7±39.76                | 127.4±36.01*                | 0.039   |
| Total cholesterol /(mmol/L)        | 5.70±1.47    | 5.95±1.49     | 5.52±1.35                  | 5.69±1.36                   | 0.130   |
| Triglycerides /(mmol/L)            | 1.67±0.56    | 1.63±0.54     | 1.77±0.59                  | 1.61±0.54                   | 0.109   |
| LDL/(mmol/L)                       | 2.86±0.95    | 3.10±1.08*    | 2.93±1.12*                 | 3.35±1.06* <sup>##</sup>    | <0.001  |
| HDL/(mmol/L)                       | 1.31±0.51    | 1.43±0.57     | 1.37±0.49                  | 1.44±0.51                   | 0.059   |
| hs-CRP/( mg/dL)                    | 1.85±0.71    | 2.14±0.98*    | 2.88±0.77* <sup>+</sup>    | 3.13±1.02* <sup>##</sup>    | <0.001  |
| Creatinine /(umol/L)               | 112.38±29.2  | 106.49±30     | 112.72±37.44               | 107.62±34.02                | 0.203   |
| eGFR/(ml/min/1.73m <sup>2</sup> )  | 85.71±29.12  | 81.85±28.71   | 78.92±26.31                | 81.28±27.09                 | 0.101   |
| BNP/(pg/ml)                        | 265.12±85.39 | 245.58±79.28* | 269.71±76.56* <sup>+</sup> | 298.73±76.56* <sup>##</sup> | <0.001  |
| Troponin I (ng/mL)                 | 5.89±2.51    | 7.52±3.52*    | 7.65±3.79*                 | 11.08±4.18* <sup>##</sup>   | <0.001  |
| <b>Medical Treatment</b>           |              |               |                            |                             |         |
| Aspirin, n(%)                      | 309(96.87)   | 119(94.44)    | 96(94.12)                  | 129(98.47)                  | 0.202   |
| Anticoagulant, n(%)                | 305(95.61)   | 117(92.86)    | 93(91.18)                  | 124(94.66)                  | 0.340   |
| Statin, n(%)                       | 292(91.54)   | 112(88.89)    | 90(88.24)                  | 121(92.37)                  | 0.589   |
| ACEI or ARB, n(%)                  | 186(58.31)   | 71(56.35)     | 61(59.8)                   | 84(64.12)                   | 0.602   |
| Beta-blocker, n(%)                 | 259(81.19)   | 98(77.78)     | 86(84.31)                  | 105(80.15)                  | 0.654   |

|                                        |            |           |           |            |       |
|----------------------------------------|------------|-----------|-----------|------------|-------|
| Calcium-channel blockers, n(%)         | 67(21.00)  | 30(23.81) | 26(25.49) | 28(21.37)  | 0.767 |
| Nitrate drugs, n(%)                    | 257(80.56) | 96(76.19) | 75(73.53) | 106(80.92) | 0.369 |
| <b>Angiographic Findings</b>           |            |           |           |            |       |
| Number of diseased vessels             |            |           |           |            | 0.145 |
| one-vessel, n(%)                       | 182(57.05) | 65(51.59) | 54(52.94) | 57(43.51)  |       |
| two-vessel, n(%)                       | 76(23.82)  | 39(30.95) | 32(31.37) | 42(32.06)  |       |
| three-vessel/ Left main, n(%)          | 61(19.12)  | 22(17.46) | 16(15.69) | 32(24.43)  |       |
| Number of Implanted Stents             | 1.95±0.79  | 2.01±0.85 | 2.11±0.94 | 2.15±1.01  | 0.125 |
| Total stent length/(mm)                | 39.6±24.1  | 37.2±21.9 | 35.8±26.3 | 41.9±22.2  | 0.190 |
| Stent diameter/(mm)                    | 2.59±1.33  | 2.85±1.09 | 2.84±1.27 | 2.68±1.16  | 0.114 |
| Moderate or severe tortuosity, n(%)    | 27(8.46)   | 16(12.70) | 11(10.78) | 14(10.69)  | 0.575 |
| Moderate or severe calcification, n(%) | 29(9.09)   | 14(11.11) | 13(12.75) | 15(11.45)  | 0.706 |

\*: compared with low-MLR + low-NLR group, p<0.05;

+: compared with low-MLR+ high-NLR group, p<0.05;

#: compared with high-MLR+ low-NLR group, p<0.05.

ACEI, angiotensin-converting enzyme inhibitor; ARB, angiotensin receptor blocker; BNP, brain natriuretic peptide; eGFR, estimated glomerular filtration rate; HDL, high-density lipoprotein; hs-CRP, high-sensitivity C-reactive protein; LDL, low-density lipoprotein; MLR, monocyte-to-lymphocyte ratio; NLR, neutrophil-to-lymphocyte ratio.

### Clinical outcomes

During the median follow-up period of 26 months, long-term MACE were observed in 139 (20.50%) patients. 10 (1.47%) patients died, 40 (5.90%) patients had a non-fatal MI, 24(3.54%) patients experienced stroke, 61(9.00%) patients underwent TLR and 4 (0.59%) patients underwent TVR. Overall, the patients in the high-MLR + high-NLR group had higher MACE rate, compared to the other three groups. The mortality, non-fatal MI, stroke and TLR were significantly higher in patients with high-MLR + high-NLR, than those with either lower MLR or lower NLR, whereas the four groups had similar TVR (**Table 2**).

The Kaplan-Meier curves based on the cut-off value of MLR and NLR, were presented



in **Figure 2A** and **Figure 2B**, respectively. Significantly increased long-term MACE rates were observed in patients with high MLR (33.48% vs. 13.71%,  $P < 0.001$ , **Figure 2A**) and in patients with high NLR (31.52% vs. 13.78%,  $P < 0.001$ , **Figure 2B**). The Kaplan-Meier MACE-free curve based on the combined markers was shown in **Figure 2C**. The MACE rates were significantly different among the four groups ( $P < 0.001$ ) and patients in high-MLR + high-NLR group had the highest MACE rate.

**Table 2 Clinical outcomes between the four groups based on the cut-off values of MLR and NLR**

| Variable                       | Low-MLR  | Low-MLR    | High-MLR   | High-MLR     | P-value |
|--------------------------------|----------|------------|------------|--------------|---------|
|                                | +        | +          | +          | +            |         |
|                                | Low-NLR  | High-NLR   | Low-NLR    | High-NLR     |         |
|                                | (n=319)  | (n=126)    | (n=102)    | (n=131)      |         |
| <b>Follow-up 2 years, n(%)</b> | 30(9.40) | 31(24.60)* | 28(27.45)* | 50(38.17)*+# | <0.001  |
| All- cause death, n(%)         | 2(0.63)  | 1(0.79)    | 1(0.98)    | 6(4.58)*     | 0.010   |
| Cardiac death, n(%)            | 1(0.31)  | 1(0.79)    | 1(0.98)    | 5(3.82)*     | 0.018   |
| Nonfatal MI, n(%)              | 9(2.82)  | 8(6.35)    | 9(8.82)*   | 14(10.69)*   | 0.006   |
| Stroke, n(%)                   | 4(1.25)  | 6(4.76)*   | 5(4.9)*    | 9(6.87)*     | 0.017   |
| TLR, n(%)                      | 14(4.39) | 16(12.70)* | 12(11.76)* | 19(14.50)*   | 0.001   |
| TVR, n(%)                      | 1(0.31)  | 0(0)       | 1(0.98)    | 2(1.53)      | 0.335   |

\*: compared with low-MLR + low-NLR group,  $p < 0.05$ ;

+: compared with low-MLR + high-NLR group,  $p < 0.05$ ;

#: compared with high-MLR + low-NLR group,  $p < 0.05$ .

MI, myocardial infarction; TLR, target lesion revascularization; TVR, target vessel revascularization.

### Independent predictors of long-term MACE

Univariate and multivariate COX regression analyses were utilized to determine the independent predictors of long-term MACE in patients with NSTEMI undergoing primary PCI. In univariate COX analysis, white blood cells, neutrophils, lymphocytes, monocytes,

MLR, NLR, LDL, hs-CRP, BNP, and Troponin I were found to be significantly associated with long-term MACE (see online supplementary **Table S1**). After adjusting for covariates, both MLR (HR 2.128, 95% CI: 1.458-3.105,  $P < 0.001$ ) and NLR (HR 1.925, 95% CI: 1.385-2.676,  $P < 0.001$ ) were found to be significant predictors of long-term MACE in multivariate COX regression. Moreover, the combination of MLR and NLR was found to be an independent predictor of long-term MACE (HR 4.055, 95% CI: 2.550-6.448,  $P < 0.001$  for patients with high-MLR + high NLR vs. patients with low-MLR + low-NLR). In addition to MLR and NLR, hs-CRP and BNP were also independent predictors of long-term MACE in patients with NSTEMI undergoing primary PCI (**Table 3**). The details of multivariate COX regression analyses were presented in online supplementary **Table S2**.

**Table 3 Independent predictors of long-term MACE in patients with NSTEMI by multivariate COX regression analyses**

| Variable                   | Hazard Ratio | 95% Confidence Interval | P value |
|----------------------------|--------------|-------------------------|---------|
| <b>Model 1</b>             |              |                         |         |
| MLR                        |              |                         |         |
| Low MLR, MLR<0.36          | Ref          |                         |         |
| High MLR, MLR $\geq$ 0.36  | 2.128        | 1.458-3.105             | <0.001  |
| NLR                        |              |                         |         |
| Low NLR, NLR<2.15          | Ref          |                         |         |
| High NLR, NLR $\geq$ 2.15  | 1.925        | 1.385-2.676             | <0.001  |
| hs-CRP                     | 1.747        | 1.173-2.601             | 0.006   |
| BNP                        | 1.950        | 1.156-3.290             | 0.012   |
| <b>Model 2</b>             |              |                         |         |
| Combination of MLR and NLR |              |                         |         |
| Low-MLR + Low-NLR          | Ref          | -                       | -       |
| Low-MLR + High-NLR         | 2.732        | 1.417-5.268             | 0.003   |
| High-MLR + Low-NLR         | 3.004        | 1.519-5.940             | 0.002   |

|                     |       |             |        |
|---------------------|-------|-------------|--------|
| High-MLR + High-NLR | 4.055 | 2.550-6.448 | <0.001 |
| hs-CRP              | 1.576 | 1.058-2.349 | 0.025  |
| BNP                 | 1.874 | 1.137-3.088 | 0.014  |

BNP, brain natriuretic peptide; hs-CRP, high-sensitivity C-reactive protein; MLR, monocyte-to-lymphocyte ratio; NLR, neutrophil-to-lymphocyte ratio.

### Diagnostic efficacy of MLR in combination with NLR in differentiating MACE

ROC curves were used to evaluate and compare the predictive performance of MLR in combination with NLR with (i) MLR, NLR, hs-CRP and BNP alone, and (ii) all other pairwise combinations of the four biomarkers, for differentiating long-term MACE. **Figure 3A** showed that MLR in combination with NLR (AUC: 0.715, 95%CI: 0.679-0.748) achieved better performance in predicting long-term MACE, than MLR (AUC: 0.683, 95%CI: 0.647-0.718), NLR (AUC: 0.646, 95%CI: 0.609-0.682), hs-CRP (AUC: 0.642, 95%CI: 0.593-0.691) and BNP alone (AUC: 0.633, 95%CI: 0.583-0.682) (All *P* values < 0.05), whereas there was no statistical difference among the four individual biomarkers in AUC values. Additionally, MLR in combination with NLR showed similar performance to all other pairwise combinations of the four biomarkers (All *P* values ≥ 0.05, **Figure 3B**).

## DISCUSSION

In this study, there were 139 of 678 patients (20.50%) presented with MACE, during the follow-up period. The MACE rate was comparable between our study and the previous study (21.62%)<sup>15</sup>. The novel finding of the present study was that elevated MLR and NLR were independently associated with adverse clinical outcomes in patients with NSTEMI. Moreover, the study demonstrated for the first time that the combination of MLR with NLR has stronger predictive potential for long-term MACE in patients with NSTEMI undergoing primary PCI,

1  
2  
3 compared with individual MLR or NLR.  
4

5  
6 Many compelling studies have clearly indicated that NLR can be a reliable prognostic  
7  
8 factor for short and long-term adverse outcomes in patients with acute coronary syndrome  
9  
10 undergoing PCI.<sup>16 17</sup> Neutrophils, the most abundant white blood cells in the circulation, are  
11  
12 actively involved in the atherogenesis and plaque destabilization.<sup>18 19</sup> Several mechanisms can  
13  
14 probably explain the pivotal role of neutrophils in atherosclerosis: (1) Neutrophils can  
15  
16 infiltrate coronary atherosclerotic plaques and the infarcted myocardium, and mediate tissue  
17  
18 damage by releasing matrix-degrading enzymes and reactive oxygen species; (2) Increases in  
19  
20 neutrophil counts can aggravate endothelial dysfunction, modulate microvascular  
21  
22 permeability and contribute to foam cell formation; (3) Neutrophils can promote endothelial  
23  
24 erosion, weaken fibrous cap and accelerate neointima formation which contribute to plaque  
25  
26 destabilization.<sup>20-23</sup> Lymphocytes are an integral part of the immune system, which participate  
27  
28 in every phase of atherosclerosis. Lymphocytopenia, resulting from increased lymphocytes  
29  
30 apoptosis, contributes to atherosclerotic plaque growth, lipid core development, plaque  
31  
32 destabilization, post-infarct cardiac remodeling and progression.<sup>3 24</sup> Lower lymphocyte count  
33  
34 was reported to be not only an early marker of acute myocardial infarction, but also  
35  
36 associated with worse cardiovascular outcomes.<sup>25 26</sup> Obviously, it could be concluded that  
37  
38 NLR, a composite marker of neutrophils and lymphocytes, can provide prognostic value in  
39  
40 ACS patients. In agreement with previous evidence, our study confirmed the prognostic role  
41  
42 of increased NLR in patients with NSTEMI.  
43  
44  
45  
46  
47  
48  
49  
50  
51

52 MLR, a novel hematological marker, has been recently reported as a prognostic factor in  
53  
54 many diseases, especially various malignancies.<sup>27 28</sup> To date, just a few studies have  
55  
56

1  
2  
3 attempted to elucidate the impact of MLR on cardiovascular disease. In our previous studies,  
4  
5  
6 MLR had the potential in assessing coronary lesion severity,<sup>9</sup> and identifying the vulnerable  
7  
8  
9 plaques in patients with stable angina.<sup>29</sup> Siva et al. showed that increased MLR level was  
10  
11 associated with higher mortality in patients with acute heart failure.<sup>10</sup> Kiris et al. reported that  
12  
13 elevated MLR level was independently associated with a higher risk of six-month mortality  
14  
15 in patients with STEMI undergoing primary PCI.<sup>11</sup> Gijsberts et al. found that MLR  
16  
17 significantly improved mortality prediction in coronary angiography patients.<sup>12</sup> Thus, a high  
18  
19 MLR was associated with adverse cardiac clinical outcomes, though fewer studies have been  
20  
21 performed for MLR and cardiac prognosis, compared to those for NLR. Monocytes play an  
22  
23 essential role in every stage of atherosclerosis.<sup>30</sup> They can recruit to the artery wall,  
24  
25 differentiate into macrophages and stimulate activating the secretion of pro-inflammatory  
26  
27 cytokines.<sup>8</sup> Compared with neutrophils, monocytes can produce higher levels of cytokines.<sup>31</sup>  
28  
29 Recent pathological studies have found that monocytes can replace neutrophils and become  
30  
31 the prominent infiltrating leukocytes within 48 h after the onset of myocardial ischemia.<sup>32</sup> On  
32  
33 the other hand, myocardial infarction may liberate hematopoietic stem and progenitor cells  
34  
35 from bone marrow niches which could increase the availability of monocytes.<sup>33</sup> Therefore,  
36  
37 MLR, being an integrated reflection of two important immune cells, could be a potentially  
38  
39 prognostic factor for acute coronary syndrome, and the present study confirmed the  
40  
41 hypothesis. Our results revealed that MLR was an independent predictor of long-term MACE  
42  
43 and had comparable diagnostic ability as NLR for long-term MACE in patients with  
44  
45 NSTEMI undergoing primary PCI. Compared with STEMI, NSTEMI is much more common  
46  
47 and tends to have an increased mortality in the year following the myocardial infarction.<sup>34</sup>  
48  
49  
50  
51  
52  
53  
54  
55

1  
2  
3 Furthermore, we evaluated the combined usefulness of MLR and NLR for predicting  
4 long-term MACE in patients with NSTEMI undergoing primary PCI. Our results showed that  
5  
6 the combination of MLR with NLR was an independent predictor, more predictive than  
7  
8 individual markers, in predicting the long-term MACE in patients with NSTEMI.  
9  
10  
11  
12

13 In addition, our study found that hs-CRP and BNP were also independent predictors of  
14 long-term MACE in patients with NSTEMI undergoing primary PCI. Hs-CRP and BNP were  
15 classical biomarkers correlated with cardiovascular risk and prognosis. A recent  
16 meta-analysis of 14 studies concluded that elevated hs-CRP could predict the risk of  
17 cardiovascular mortality in the general population.<sup>35</sup> Cho KI et al. showed that an increased  
18 hs-CRP level was a significant independent predictor of long-term adverse events in patients  
19 with NSTEMI/unstable angina.<sup>15</sup> BNP has been established as a biomarker in vascular  
20 diseases used for monitoring disease progression. Porapakkham et al. performed a  
21 meta-analysis of eight randomized clinical trials and indicated that BNP could be used for  
22 guiding the treatment of chronic heart failure,<sup>36</sup> while Klok et al. conducted a meta-analysis  
23 of 13 studies and revealed the prognostic value of BNP in patients with pulmonary  
24 embolism.<sup>37</sup> In patients with NSTEMI, Fukazawa et al. showed that an increased  
25 concentration of BNP at admission was closely associated with poor prognosis.<sup>38</sup> Our study  
26 suggested that in addition to MLR and NLR, hs-CRP and BNP are also independent  
27 prognostic factors of long-term MACE in patients with NSTEMI undergoing primary PCI.  
28 Besides, compared with hs-CRP and BNP, the combined usefulness of MLR and NLR was  
29 with higher HR. ROC curves revealed that MLR in combination with NLR was superior to  
30 either MLR, NLR, hs-CRP or BNP alone in predicting long-term MACE, and it had similar  
31  
32  
33  
34  
35  
36  
37  
38  
39  
40  
41  
42  
43  
44  
45  
46  
47  
48  
49  
50  
51  
52  
53  
54  
55  
56  
57  
58  
59  
60

1  
2  
3 performance to all other pairwise combinations of the four biomarkers. Moreover, the  
4  
5 measurement of MLR and NLR could be more cost-effectiveness and easily accessible in  
6  
7 clinical practice, which would possess practical clinical utility in the prognosis prediction of  
8  
9  
10  
11 NSTEMI.

12  
13 This study had several limitations. Firstly, this study comprised of a modest sample size  
14  
15 which may introduce selection bias. The single center study was lack of external validation.  
16  
17 Thus, these findings need further multi-institutional with larger samples validation. Secondly,  
18  
19 we evaluated the MLR and NLR on admission of the hospital, but didn't assess their dynamic  
20  
21 changes during the follow-up period. Thirdly, inflammatory biomarkers such as  
22  
23 myeloperoxidase, interleukin-6 and tumor necrosis factor were not analyzed in our patients.  
24  
25 Finally, several scoring systems, for example, the HEART Score, have been developed to risk  
26  
27 stratify patients with ACS and reported to be associated with patients' prognosis. It would be  
28  
29 of interest to investigate the additive value of MLR/NLR to the scoring systems, but this is  
30  
31 beyond the scope of this study. Notwithstanding these limitations, this study firstly reported  
32  
33 the prognostic value of the combination of MLR with NLR in patients with NSTEMI.  
34  
35  
36  
37  
38  
39

40 In conclusion, the combined usefulness of MLR with NLR gains a prognostic value in  
41  
42 patients with NSTEMI, which could be used to identify the high risk patients with poor  
43  
44 outcomes and adjust their treatment accordingly. These findings provide a new perspective  
45  
46 on the non-invasive, simple, economical and feasible biomarkers in predicting long-term  
47  
48 MACE in patients with NSTEMI.  
49  
50  
51  
52  
53

54  
55 **Contributors** ZF made the major contribution to the conception and design of the study, and

1  
2  
3 drafted the manuscript. YL and HJ contributed to the data acquisition and performed the  
4  
5 statistical analyses. XJ revised the manuscript. XJ is the guarantor of the study. All authors  
6  
7 read and approved the final manuscript prior to the submission.  
8  
9

10 **Funding statement** This research received no specific grant from any funding agency in the  
11  
12 public, commercial or not-for-profit sectors.  
13  
14

15 **Competing interests** None declared.  
16  
17

18 **Ethics approval** This research was approved by the ethics committee of the Ethical  
19  
20 Committee of Civil Aviation General Hospital (CAGH-EC100201). The study was designed  
21  
22 and performed in accordance with the Declaration of Helsinki.  
23  
24

25 **Data Sharing Statement** Raw data can be obtained by contacting the corresponding author.  
26  
27

## 28 REFERENCES

- 29 1. Murtagh BM, Anderson HV. Inflammation and atherosclerosis in acute coronary  
30 syndromes. *J Invasive Cardiol* 2004;16(7):377-84.
- 31 2. Nahrendorf M, Swirski FK. Immunology. Neutrophil-macrophage communication in  
32 inflammation and atherosclerosis. *Science* 2015;349(6245):237-8. doi:  
33 10.1126/science.aac7801
- 34 3. Horne BD, Anderson JL, John JM, et al. Which white blood cell subtypes predict increased  
35 cardiovascular risk? *J Am Coll Cardiol* 2005;45(10):1638-43. doi:  
36 10.1016/j.jacc.2005.02.054
- 37 4. Arbel Y, Finkelstein A, Halkin A, et al. Neutrophil/lymphocyte ratio is related to the  
38 severity of coronary artery disease and clinical outcome in patients undergoing  
39 angiography. *Atherosclerosis* 2012;225(2):456-60. doi:  
40 10.1016/j.atherosclerosis.2012.09.009 %/ Copyright (c) 2012 Elsevier Ireland Ltd. All  
41 rights reserved.
- 42 5. Gul M, Uyarel H, Ergelen M, et al. Predictive value of neutrophil to lymphocyte ratio in  
43 clinical outcomes of non-ST elevation myocardial infarction and unstable angina  
44 pectoris: a 3-year follow-up. *Clin Appl Thromb Hemost* 2014;20(4):378-84. doi:  
45 10.1177/1076029612465669
- 46 6. Kurtul A, Yarlioglues M, Duran M, et al. Association of Neutrophil-to-lymphocyte Ratio  
47 with Contrast-induced Nephropathy in Patients with Non-ST-elevation Acute  
48 Coronary Syndrome Treated with Percutaneous Coronary Intervention. *Heart Lung*  
49 *Circ* 2016;25(7):683-90. doi: 10.1016/j.hlc.2016.01.007 %/ Copyright (c) 2016  
50  
51  
52  
53  
54  
55



- Australian and New Zealand Society of Cardiac and Thoracic Surgeons (ANZSCTS) and the Cardiac Society of Australia and New Zealand (CSANZ). Published by Elsevier B.V. All rights reserved.
7. Azab B, Zaher M, Weiserbs KF, et al. Usefulness of neutrophil to lymphocyte ratio in predicting short- and long-term mortality after non-ST-elevation myocardial infarction. *Am J Cardiol* 2010;106(4):470-6. doi: 10.1016/j.amjcard.2010.03.062
  8. Ley K, Miller YI, Hedrick CC. Monocyte and macrophage dynamics during atherogenesis. *Arterioscler Thromb Vasc Biol* 2011;31(7):1506-16. doi: 10.1161/atvbaha.110.221127
  9. Ji H, Li Y, Fan Z, et al. Monocyte/lymphocyte ratio predicts the severity of coronary artery disease: a syntax score assessment. *BMC Cardiovasc Disord* 2017;17(1):90. doi: 10.1186/s12872-017-0507-4
  10. Silva N, Bettencourt P, Guimaraes JT. The lymphocyte-to-monocyte ratio: an added value for death prediction in heart failure. *Nutr Metab Cardiovasc Dis* 2015;25(11):1033-40. doi: 10.1016/j.numecd.2015.07.004 %/ Copyright (c) 2015 The Italian Society of Diabetology, the Italian Society for the Study of Atherosclerosis, the Italian Society of Human Nutrition, and the Department of Clinical Medicine and Surgery, Federico II University. Published by Elsevier B.V. All rights reserved.
  11. Kiris T, Celik A, Varis E, et al. Association of Lymphocyte-to-Monocyte Ratio With the Mortality in Patients With ST-Elevation Myocardial Infarction Who Underwent Primary Percutaneous Coronary Intervention. *Angiology* 2017;3319716685480. doi: 10.1177/0003319716685480
  12. Gijssberts CM, Ellenbroek GH, Ten Berg MJ, et al. Routinely analyzed leukocyte characteristics improve prediction of mortality after coronary angiography. *Eur J Prev Cardiol* 2016;23(11):1211-20. doi: 10.1177/2047487315621832
  13. Cutlip DE, Windecker S, Mehran R, et al. Clinical end points in coronary stent trials: a case for standardized definitions. *Circulation* 2007;115(17):2344-51. doi: 10.1161/circulationaha.106.685313
  14. Paiva L, Providencia R, Barra S, et al. Universal definition of myocardial infarction: clinical insights. *Cardiology* 2015;131(1):13-21. doi: 10.1159/000371739 %/ (c) 2015 S. Karger AG, Basel.
  15. Cho KI, Ann SH, Singh GB, et al. Combined Usefulness of the Platelet-to-Lymphocyte Ratio and the Neutrophil-to-Lymphocyte Ratio in Predicting the Long-Term Adverse Events in Patients Who Have Undergone Percutaneous Coronary Intervention with a Drug-Eluting Stent. *PLoS One* 2015;10(7):e0133934. doi: 10.1371/journal.pone.0133934
  16. Park JJ, Jang HJ, Oh IY, et al. Prognostic value of neutrophil to lymphocyte ratio in patients presenting with ST-elevation myocardial infarction undergoing primary percutaneous coronary intervention. *Am J Cardiol* 2013;111(5):636-42. doi: 10.1016/j.amjcard.2012.11.012 %/ Copyright (c) 2013 Elsevier Inc. All rights reserved.
  17. Sawant AC, Adhikari P, Narra SR, et al. Neutrophil to lymphocyte ratio predicts short- and long-term mortality following revascularization therapy for ST elevation myocardial infarction. *Cardiol J* 2014;21(5):500-8. doi: 10.5603/CJ.a2013.0148

18. Amulic B, Cazalet C, Hayes GL, et al. Neutrophil function: from mechanisms to disease. *Annu Rev Immunol* 2012;30:459-89. doi: 10.1146/annurev-immunol-020711-074942
19. Strydom N, Rankin SM. Regulation of circulating neutrophil numbers under homeostasis and in disease. *J Innate Immun* 2013;5(4):304-14. doi: 10.1159/000350282 %/ Copyright (c) 2013 S. Karger AG, Basel.
20. Naruko T, Ueda M, Haze K, et al. Neutrophil infiltration of culprit lesions in acute coronary syndromes. *Circulation* 2002;106(23):2894-900.
21. Abou-Raya A, Abou-Raya S. Inflammation: a pivotal link between autoimmune diseases and atherosclerosis. *Autoimmun Rev* 2006;5(5):331-7. doi: 10.1016/j.autrev.2005.12.006
22. Iadecola C, Anrather J. The immunology of stroke: from mechanisms to translation. *Nat Med* 2011;17(7):796-808. doi: 10.1038/nm.2399
23. Soehnlein O. Multiple roles for neutrophils in atherosclerosis. *Circ Res* 2012;110(6):875-88. doi: 10.1161/circresaha.111.257535
24. Blum A. Role of lymphocytes in heart disease. *Circulation* 1998;98(15):1590.
25. Tamhane UU, Aneja S, Montgomery D, et al. Association between admission neutrophil to lymphocyte ratio and outcomes in patients with acute coronary syndrome. *Am J Cardiol* 2008;102(6):653-7. doi: 10.1016/j.amjcard.2008.05.006
26. Tang TT, Yuan J, Zhu ZF, et al. Regulatory T cells ameliorate cardiac remodeling after myocardial infarction. *Basic Res Cardiol* 2012;107(1):232. doi: 10.1007/s00395-011-0232-6
27. Nishijima TF, Muss HB, Shachar SS, et al. Prognostic value of lymphocyte-to-monocyte ratio in patients with solid tumors: A systematic review and meta-analysis. *Cancer Treat Rev* 2015;41(10):971-8. doi: 10.1016/j.ctrv.2015.10.003 %/ Copyright (c) 2015 Elsevier Ltd. All rights reserved.
28. Gu L, Li H, Chen L, et al. Prognostic role of lymphocyte to monocyte ratio for patients with cancer: evidence from a systematic review and meta-analysis. *Oncotarget* 2016;7(22):31926-42. doi: 10.18632/oncotarget.7876
29. Fan Z, Ji H, Li Y, et al. Relationship between monocyte-to-lymphocyte ratio and coronary plaque vulnerability in patients with stable angina. *Biomarkers in medicine* 2017;11(11):979-90. doi: 10.2217/bmm-2017-0235
30. Auffray C, Sieweke MH, Geissmann F. Blood monocytes: development, heterogeneity, and relationship with dendritic cells. *Annu Rev Immunol* 2009;27:669-92. doi: 10.1146/annurev.immunol.021908.132557
31. Ramsay SC, Maggs JA, Ketheesan N, et al. Relative uptake of technetium 99m stannous colloid by neutrophils and monocytes is altered by gram-negative infection. *Nuclear medicine and biology* 2005;32(1):101-07.
32. Freytes DO, Santambrogio L, Vunjak-Novakovic G. Optimizing dynamic interactions between a cardiac patch and inflammatory host cells. *Cells Tissues Organs* 2012;195(1-2):171-82.
33. Dutta P, Courties G, Wei Y, et al. Myocardial infarction accelerates atherosclerosis. *Nature* 2012;487(7407):325-9. doi: 10.1038/nature11260
34. Fine DH. Methods for diagnosing and treating a heart condition in a patient: Google

- 1  
2  
3 Patents %\ 2017-08-26 22:07:00, 2009.
- 4 35. Li Y, Zhong X, Cheng G, et al. Hs-CRP and all-cause, cardiovascular, and cancer  
5 mortality risk: A meta-analysis. *Atherosclerosis* 2017;259:75-82. doi:  
6 10.1016/j.atherosclerosis.2017.02.003 %/ Copyright (c) 2017 Elsevier B.V. All rights  
7 reserved.  
8
- 9 36. Porapakkham P, Porapakkham P, Zimmet H, et al. B-type natriuretic peptide-guided heart  
10 failure therapy: A meta-analysis. *Arch Intern Med* 2010;170(6):507-14. doi:  
11 10.1001/archinternmed.2010.35  
12
- 13 37. Klok FA, Mos IC, Huisman MV. Brain-type natriuretic peptide levels in the prediction of  
14 adverse outcome in patients with pulmonary embolism: a systematic review and  
15 meta-analysis. *Am J Respir Crit Care Med* 2008;178(4):425-30. doi:  
16 10.1164/rccm.200803-459OC  
17
- 18 38. Fukazawa S, Teruya K, Uemura T, et al. The relationship between long-term changes in  
19 plasma B-type natriuretic peptide levels and electrocardiographic findings. *Environ*  
20 *Health Prev Med* 2008;13(3):156-61. doi: 10.1007/s12199-008-0027-z  
21  
22

### 23 **Figure Legend**

24  
25  
26 **Figure 1.** Flow Chart of the study cohort. The flow chart presents the selection criteria of the  
27 study and the clinical layout of the study population.  
28

29  
30  
31 **Figure 2.** Kaplan-Meier cumulative MACE-free curves in patients with NSTEMI (A)  
32 according to the cut-off value of MLR; (B) according to the cut-off value of NLR; (C)  
33 according to MLR combined with NLR.  
34  
35  
36

37  
38 **Figure 3.** Receiver-operating characteristic curves showing area under the curve for (A)  
39 MLR in combination with NLR (MLR+NLR), MLR alone, NLR alone, hs-CRP alone and  
40 BNP alone; (B) MLR+NLR, MLR in combination with hs-CRP (MLR+hs-CRP), MLR in  
41 combination with BNP (MLR+BNP), NLR in combination with hs-CRP (NLR+hs-CRP),  
42 NLR in combination with BNP (NLR+BNP) and hs-CRP in combination with BNP  
43 (hs-CRP+BNP); for long-term MACE in NSTEMI patients.  
44  
45  
46  
47  
48  
49  
50  
51  
52  
53  
54  
55

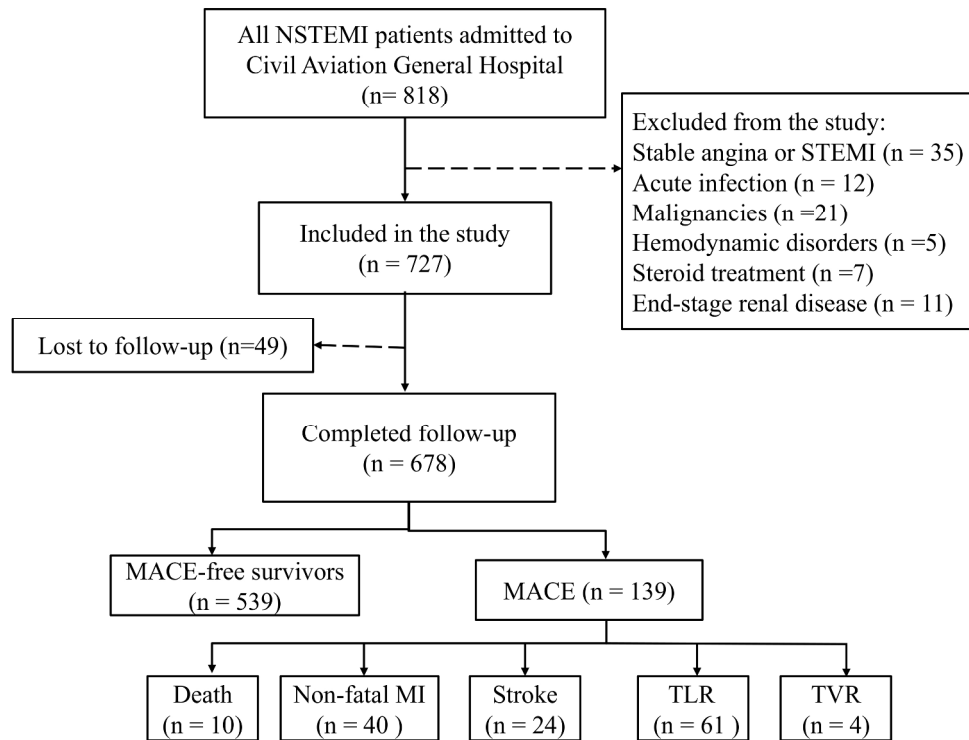

Figure 1. Flow Chart of the study cohort. The flow chart presents the selection criteria of the study and the clinical layout of the study population.

254x190mm (300 x 300 DPI)

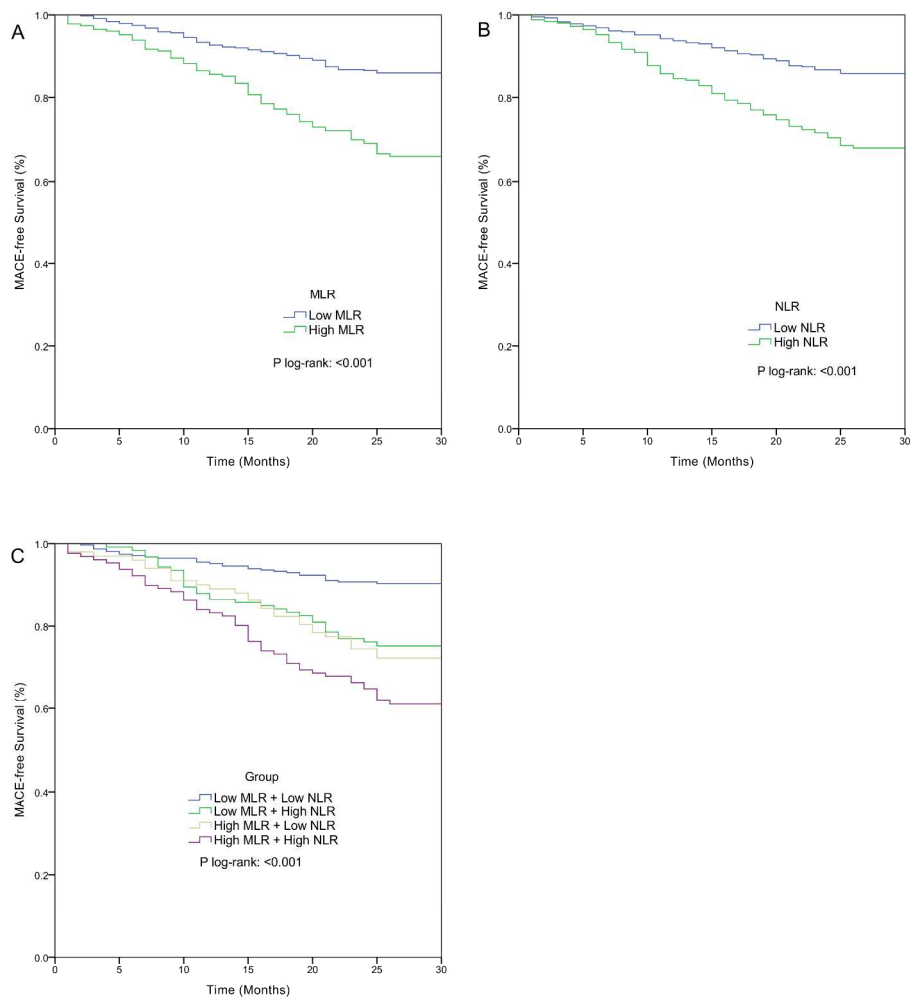

Figure 2. Kaplan-Meier cumulative MACE-free curves in patients with NSTEMI (A) according to the cut-off value of MLR; (B) according to the cut-off value of NLR; (C) according to MLR combined with NLR.

282x289mm (300 x 300 DPI)

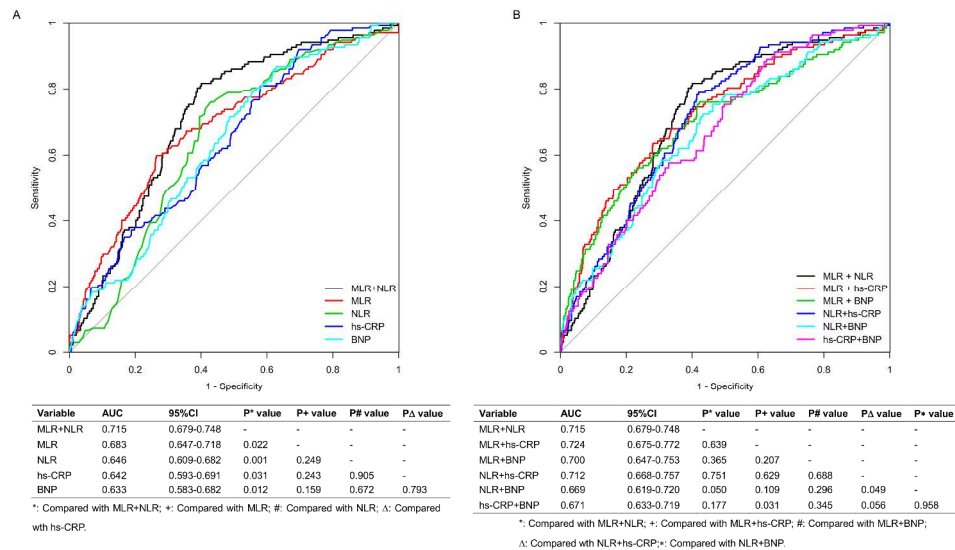

Figure 3. Receiver-operating characteristic curves showing area under the curve for (A) MLR in combination with NLR (MLR+NLR), MLR alone, NLR alone, hs-CRP alone and BNP alone; (B) MLR+NLR, MLR in combination with hs-CRP (MLR+hs-CRP), MLR in combination with BNP (MLR+BNP), NLR in combination with hs-CRP (NLR+hs-CRP), NLR in combination with BNP (NLR+BNP) and hs-CRP in combination with BNP (hs-CRP+BNP); for long-term MACE in NSTEMI patients.

359x211mm (300 x 300 DPI)

**Table S1 Associated factors of long-term MACE in patients with NSTEMI by univariate COX regression analyses (n=678)**

| Variable                           | non-MACE<br>(n=539) | MACE<br>(n=139) | Hazard<br>Ratio | 95%CI       | P Value |
|------------------------------------|---------------------|-----------------|-----------------|-------------|---------|
| Age /(year)                        | 62.18±15.54         | 65.26±13.78     | 1.127           | 0.056-1.127 | 0.033   |
| Male, n (%)                        | 345(64.01)          | 90(64.75)       | 0.968           | 0.656-1.430 | 0.871   |
| Family history, n (%)              | 67(12.43)           | 14(10.07)       | 1.267           | 0.689-2.330 | 0.445   |
| Hypertension, n(%)                 | 379(70.32)          | 106(76.26)      | 0.737           | 0.479-1.136 | 0.167   |
| Diabetes Mellitus, n(%)            | 215(39.89)          | 64(46.04)       | 0.778           | 0.534-1.132 | 0.189   |
| Dyslipidemia, n (%)                | 194(35.99)          | 55(39.57)       | 0.859           | 0.586-1.259 | 0.436   |
| Current Smoker, n (%)              | 191(35.44)          | 46(33.09)       | 1.110           | 0.748-1.647 | 0.606   |
| Killip class (> I)                 | 348(64.56)          | 98(70.50)       | 0.762           | 0.508-1.143 | 0.189   |
| Ejection fraction                  | 65.59±10.25         | 64.37±10.06     | 1.68            | 0.414-1.68  | 0.210   |
| <b>Laboratory parameters</b>       |                     |                 |                 |             |         |
| White blood cell, ×10 <sup>9</sup> | 6.75±2.09           | 7.28±2.59       | 1.138           | 1.029-1.258 | 0.012   |
| Neutrophil, ×10 <sup>9</sup>       | 4.42±1.16           | 5.02±1.18       | 1.198           | 1.121-1.280 | <0.001  |
| Lymphocyte, ×10 <sup>9</sup>       | 2.29±0.65           | 1.85±0.61       | 0.859           | 0.824-0.896 | <0.001  |
| Monocyte, ×10 <sup>9</sup>         | 0.27±0.13           | 0.36±0.15       | 2.606           | 1.987-3.419 | <0.001  |
| High MLR, n(%)                     | 141(26.16)          | 92(66.19)       | 5.525           | 3.702-8.245 | <0.001  |
| High NLR, n(%)                     | 172(31.91)          | 85(61.15)       | 3.359           | 2.283-4.942 | <0.001  |
| Hemoglobin /(g/L)                  | 132.87±36.22        | 134.26±32.85    | 1.146           | 0.598-2.195 | 0.681   |
| Total cholesterol /(mmol/L)        | 5.69±1.41           | 5.82±1.38       | 1.162           | 0.859-1.571 | 0.331   |
| Triglycerides /(mmol/L)            | 1.67±0.52           | 1.65±0.54       | 1.113           | 0.659-1.879 | 0.688   |
| LDL/(mmol/L)                       | 2.91±1.09           | 3.40±1.10       | 2.773           | 1.809-4.252 | <0.001  |
| HDL/(mmol/L)                       | 1.38±0.56           | 1.31±0.58       | 1.142           | 0.935-1.394 | 0.193   |
| hs-CRP/(mg/dL)                     | 2.21±0.65           | 2.68±0.77       | 2.601           | 2.003-3.379 | <0.001  |
| Creatinine /(umol/L)               | 109.58±35.12        | 113.67±34.78    | 1.384           | 0.823-2.327 | 0.220   |
| eGFR/(ml/min/1.73m <sup>2</sup> )  | 83.94±26.98         | 79.94±25.32     | 1.672           | 0.882-3.169 | 0.115   |
| BNP/(pg/ml)                        | 264.78±80.25        | 283.77±81.78    | 1.296           | 1.055-1.591 | 0.013   |
| Troponin I (ng/mL)                 | 7.05±3.18           | 8.11±3.32       | 1.732           | 1.268-2.364 | 0.001   |
| <b>Medical Treatment</b>           |                     |                 |                 |             |         |
| Aspirin, n(%)                      | 516(95.73)          | 137(98.56)      | 0.328           | 0.076-1.406 | 0.133   |
| Anticoagulant, n(%)                | 510(94.62)          | 129(92.81)      | 1.363           | 0.648-2.870 | 0.414   |
| Statin, n(%)                       | 486(90.17)          | 129(92.81)      | 0.711           | 0.352-1.436 | 0.341   |
| ACEI or ARB, n(%)                  | 315(58.44)          | 87(62.59)       | 0.841           | 0.573-1.234 | 0.375   |

|                                   |            |            |       |             |       |
|-----------------------------------|------------|------------|-------|-------------|-------|
| Beta-blocker, n(%)                | 429(79.59) | 119(85.61) | 0.655 | 0.391-1.100 | 0.110 |
| Calcium-channel blockers,<br>n(%) | 116(21.52) | 35(25.18)  | 0.815 | 0.528-1.258 | 0.358 |
| Nitrate drugs, n(%)               | 418(77.55) | 116(83.45) | 0.685 | 0.419-1.119 | 0.131 |

ACEI, angiotensin-converting enzyme inhibitor; ARB, angiotensin receptor blocker; BNP, brain natriuretic peptide; eGFR, estimated glomerular filtration rate; HDL, high-density lipoprotein; hs-CRP, high-sensitivity C-reactive protein; LDL, low-density lipoprotein; MLR, monocyte-to-lymphocyte ratio; NLR, neutrophil-to-lymphocyte ratio.

**Table S2 Independent predictors of long-term MACE in patients with NSTEMI by multivariate COX regression analyses**

| Variable                   | Hazard Ratio | 95% Confidence Interval | P value |
|----------------------------|--------------|-------------------------|---------|
| <b>Model 1</b>             |              |                         |         |
| White blood cell           | 1.142        | 0.969-1.347             | 0.113   |
| Neutrophil                 | 1.152        | 0.954-1.393             | 0.142   |
| Lymphocyte                 | 2.130        | 0.904-5.020             | 0.084   |
| Monocyte                   | 1.208        | 0.935-1.561             | 0.149   |
| MLR                        |              |                         |         |
| Low MLR, MLR<0.36          | Ref          |                         |         |
| High MLR, MLR≥0.36         | 2.128        | 1.458-3.105             | <0.001  |
| NLR                        |              |                         |         |
| Low NLR, NLR<2.15          | Ref          |                         |         |
| High NLR, NLR≥2.15         | 1.925        | 1.385-2.676             | <0.001  |
| LDL                        | 1.173        | 0.953-1.443             | 0.132   |
| hs-CRP                     | 1.747        | 1.173-2.601             | 0.006   |
| BNP                        | 1.950        | 1.156-3.290             | 0.012   |
| Troponin I                 | 1.179        | 0.961-1.446             | 0.115   |
| <b>Model 2</b>             |              |                         |         |
| White blood cell           | 1.140        | 0.957-1.358             | 0.142   |
| Neutrophil                 | 1.145        | 0.971-1.349             | 0.108   |
| Lymphocyte                 | 0.903        | 0.758-1.076             | 0.255   |
| Monocyte                   | 2.125        | 0.904-5.010             | 0.084   |
| Combination of MLR and NLR |              |                         |         |
| Low-MLR + Low-NLR          | Ref          | -                       | -       |
| Low-MLR + High-NLR         | 2.732        | 1.417-5.268             | 0.003   |



|                     |       |             |        |
|---------------------|-------|-------------|--------|
| High-MLR + Low-NLR  | 3.004 | 1.519-5.940 | 0.002  |
| High-MLR + High-NLR | 4.055 | 2.550-6.448 | <0.001 |
| LDL                 | 1.173 | 0.953-1.443 | 0.132  |
| hs-CRP              | 1.576 | 1.058-2.349 | 0.025  |
| BNP                 | 1.874 | 1.137-3.088 | 0.014  |
| Troponin I          | 1.170 | 0.966-1.417 | 0.108  |

Effect sizes are expressed as hazard ratios with 95% confidence intervals. BNP, brain natriuretic peptide; hs-CRP, high-sensitivity C-reactive protein; LDL, low-density lipoprotein; MLR, monocyte-to-lymphocyte ratio; NLR, neutrophil-to-lymphocyte ratio.

**STROBE 2007 (v4) Statement—Checklist of items that should be included in reports of *cohort studies***

| Section/Topic                | Item # | Recommendation                                                                                                                                                                       | Reported on page # |
|------------------------------|--------|--------------------------------------------------------------------------------------------------------------------------------------------------------------------------------------|--------------------|
| Title and abstract           | 1      | (a) Indicate the study's design with a commonly used term in the title or the abstract                                                                                               | 1,2                |
|                              |        | (b) Provide in the abstract an informative and balanced summary of what was done and what was found                                                                                  | 2-3                |
| <b>Introduction</b>          |        |                                                                                                                                                                                      |                    |
| Background/rationale         | 2      | Explain the scientific background and rationale for the investigation being reported                                                                                                 | 4                  |
| Objectives                   | 3      | State specific objectives, including any prespecified hypotheses                                                                                                                     | 4                  |
| <b>Methods</b>               |        |                                                                                                                                                                                      |                    |
| Study design                 | 4      | Present key elements of study design early in the paper                                                                                                                              | 5                  |
| Setting                      | 5      | Describe the setting, locations, and relevant dates, including periods of recruitment, exposure, follow-up, and data collection                                                      | 5                  |
| Participants                 | 6      | (a) Give the eligibility criteria, and the sources and methods of selection of participants. Describe methods of follow-up                                                           | 6-7                |
|                              |        | (b) For matched studies, give matching criteria and number of exposed and unexposed                                                                                                  | Not applicable     |
| Variables                    | 7      | Clearly define all outcomes, exposures, predictors, potential confounders, and effect modifiers. Give diagnostic criteria, if applicable                                             | 6-7                |
| Data sources/<br>measurement | 8*     | For each variable of interest, give sources of data and details of methods of assessment (measurement). Describe comparability of assessment methods if there is more than one group | 6                  |
| Bias                         | 9      | Describe any efforts to address potential sources of bias                                                                                                                            | 7                  |
| Study size                   | 10     | Explain how the study size was arrived at                                                                                                                                            | 5                  |
| Quantitative variables       | 11     | Explain how quantitative variables were handled in the analyses. If applicable, describe which groupings were chosen and why                                                         | 7                  |
| Statistical methods          | 12     | (a) Describe all statistical methods, including those used to control for confounding                                                                                                | 7-8                |
|                              |        | (b) Describe any methods used to examine subgroups and interactions                                                                                                                  | 7-8                |
|                              |        | (c) Explain how missing data were addressed                                                                                                                                          | 7-8                |
|                              |        | (d) If applicable, explain how loss to follow-up was addressed                                                                                                                       | 7-8                |
|                              |        | (e) Describe any sensitivity analyses                                                                                                                                                | 7-8                |
| <b>Results</b>               |        |                                                                                                                                                                                      |                    |

|                          |     |                                                                                                                                                                                                              |             |
|--------------------------|-----|--------------------------------------------------------------------------------------------------------------------------------------------------------------------------------------------------------------|-------------|
| Participants             | 13* | (a) Report numbers of individuals at each stage of study—eg numbers potentially eligible, examined for eligibility, confirmed eligible, included in the study, completing follow-up, and analysed            | 8-9         |
|                          |     | (b) Give reasons for non-participation at each stage                                                                                                                                                         | 8-9         |
|                          |     | (c) Consider use of a flow diagram                                                                                                                                                                           | 8, Figure 1 |
| Descriptive data         | 14* | (a) Give characteristics of study participants (eg demographic, clinical, social) and information on exposures and potential confounders                                                                     | 9-11        |
|                          |     | (b) Indicate number of participants with missing data for each variable of interest                                                                                                                          | 9           |
|                          |     | (c) Summarise follow-up time (eg, average and total amount)                                                                                                                                                  | 9           |
| Outcome data             | 15* | Report numbers of outcome events or summary measures over time                                                                                                                                               | 11-12       |
| Main results             | 16  | (a) Give unadjusted estimates and, if applicable, confounder-adjusted estimates and their precision (eg, 95% confidence interval). Make clear which confounders were adjusted for and why they were included | 12-14       |
|                          |     | (b) Report category boundaries when continuous variables were categorized                                                                                                                                    | 9           |
|                          |     | (c) If relevant, consider translating estimates of relative risk into absolute risk for a meaningful time period                                                                                             | 12-14       |
| Other analyses           | 17  | Report other analyses done—eg analyses of subgroups and interactions, and sensitivity analyses                                                                                                               | 14          |
| <b>Discussion</b>        |     |                                                                                                                                                                                                              |             |
| Key results              | 18  | Summarise key results with reference to study objectives                                                                                                                                                     | 14          |
| <b>Limitations</b>       |     |                                                                                                                                                                                                              |             |
| Interpretation           | 20  | Give a cautious overall interpretation of results considering objectives, limitations, multiplicity of analyses, results from similar studies, and other relevant evidence                                   | 18          |
| Generalisability         | 21  | Discuss the generalisability (external validity) of the study results                                                                                                                                        | 18          |
| <b>Other information</b> |     |                                                                                                                                                                                                              |             |
| Funding                  | 22  | Give the source of funding and the role of the funders for the present study and, if applicable, for the original study on which the present article is based                                                | 19          |

\*Give information separately for cases and controls in case-control studies and, if applicable, for exposed and unexposed groups in cohort and cross-sectional studies.

**Note:** An Explanation and Elaboration article discusses each checklist item and gives methodological background and published examples of transparent reporting. The STROBE checklist is best used in conjunction with this article (freely available on the Web sites of PLoS Medicine at <http://www.plosmedicine.org/>, Annals of Internal Medicine at <http://www.annals.org/>, and Epidemiology at <http://www.epidem.com/>). Information on the STROBE Initiative is available at [www.strobe-statement.org](http://www.strobe-statement.org).

# BMJ Open

## Prognostic utility of the combination of monocyte-to-lymphocyte ratio and neutrophil-to-lymphocyte ratio in patients with NSTEMI after primary percutaneous coronary intervention: a retrospective cohort study

|                                 |                                                                                                                                                                                           |
|---------------------------------|-------------------------------------------------------------------------------------------------------------------------------------------------------------------------------------------|
| Journal:                        | <i>BMJ Open</i>                                                                                                                                                                           |
| Manuscript ID                   | bmjopen-2018-023459.R2                                                                                                                                                                    |
| Article Type:                   | Research                                                                                                                                                                                  |
| Date Submitted by the Author:   | 26-Aug-2018                                                                                                                                                                               |
| Complete List of Authors:       | Fan, Zeyuan; Civil Aviation General Hospital<br>Li, Yang; Civil Aviation General Hospital<br>Ji, Hanhua; Civil Aviation General Hospital<br>Jian, Xinwen; Civil Aviation General Hospital |
| <b>Primary Subject Heading</b>: | Cardiovascular medicine                                                                                                                                                                   |
| Secondary Subject Heading:      | Cardiovascular medicine                                                                                                                                                                   |
| Keywords:                       | Monocyte-to-lymphocyte ratio, Neutrophil-to-lymphocyte ratio, Major adverse cardiac events, Non-ST elevated myocardial infarction                                                         |
|                                 |                                                                                                                                                                                           |

SCHOLARONE™  
Manuscripts

1  
2  
3 **Prognostic utility of the combination of monocyte-to-lymphocyte ratio and**  
4 **neutrophil-to-lymphocyte ratio in patients with NSTEMI after primary percutaneous**  
5 **coronary intervention: a retrospective cohort study**  
6  
7  
8  
9

10  
11  
12 Zeyuan Fan<sup>1</sup>, Yang Li<sup>1</sup>, Hanhua Ji<sup>1</sup>, Xinwen Jian<sup>1</sup>

13  
14 <sup>1</sup>Department of Cardiovascular Diseases, Civil Aviation General Hospital, Civil Aviation  
15 Clinical Medical College of Peking University, Beijing, China.  
16

17  
18  
19 **Corresponding Author**

20 Xinwen Jian

21 Postal address: No.1 Gaojingjia, Chaoyang District, Beijing 100125, China.

22 Tel: +8615201277863; E-mail: jianxw\_mhzyy@163.com.  
23  
24  
25

26 **WORD COUNT 3105**  
27  
28  
29  
30  
31  
32  
33  
34  
35  
36  
37  
38  
39  
40  
41  
42  
43  
44  
45  
46  
47  
48  
49  
50  
51  
52  
53  
54  
55  
56  
57  
58  
59  
60

## ABSTRACT

**Objectives** This study aimed to evaluate prognostic value of the combination of monocyte-to-lymphocyte ratio (MLR) with neutrophil-to-lymphocyte ratio (NLR) for predicting long-term major adverse cardiac events (MACE) in patients with non-ST elevated myocardial infarction (NSTEMI) who underwent primary percutaneous coronary intervention (PCI).

**Design** Retrospective cohort study.

**Setting** Civil Aviation General Hospital, Beijing, China.

**Participants** 678 patients with NSTEMI undergoing primary PCI between July 2010 and July 2015 were enrolled.

**Main outcome measures** The main outcomes were MACE. The cumulative MACE-free survival rates were calculated by Kaplan-Meier analysis and the independent predictors of MACE were assessed by COX regression analysis.

**Results** According to the cut-off values of MLR 0.36 and NLR 2.15, the study population was classified into four groups: low MLR + low NLR group (n = 319), low MLR + high NLR group (n = 126), high MLR + low NLR group (n = 102), and high MLR + high NLR group (n = 131). High MLR + high NLR group had lower MACE-free survival rate than the other three groups (P log-rank < 0.001). Both MLR [hazard ratio (HR): 2.128, 95% CI: 1.458-3.105] and NLR (HR: 1.925, 95% CI: 1.385-2.676) were independent predictors of long-term MACE. Moreover, the patients in high-MLR + high-NLR group had a HR of 4.055 (95% CI: 2.550-6.448) for long-term MACE, with low-MLR + low-NLR group as reference.

Comparisons of ROC curves revealed that the combination of MLR with NLR achieved

1  
2  
3 better performance in differentiating long-term MACE, compared with MLR, NLR, hs-CRP  
4  
5  
6 and BNP alone, and had similar performance to all other pairwise combinations of the four  
7  
8 biomarkers.  
9

10 **Conclusions** Elevated levels of MLR and NLR were independent predictors of long-term  
11  
12 MACE in patients with NSTEMI. Moreover, the combination of MLR and NLR could  
13  
14 improve the prognostic value in predicting long-term MACE.  
15  
16

17  
18 **Keywords**

19  
20 Monocyte-to-lymphocyte ratio; Neutrophil-to-lymphocyte ratio; Major adverse cardiac  
21  
22 events; Non-ST elevated myocardial infarction  
23  
24

25  
26 **Strengths and limitations of this study**

- 27  
28 • This is the first study to report the use of monocyte-to-lymphocyte ratio (MLR) in  
29  
30 combination with neutrophil-to-lymphocyte ratio (NLR) to predict major adverse cardiac  
31  
32 events (MACE) in patients with non-ST elevated myocardial infarction (NSTEMI)  
33  
34 undergoing primary percutaneous coronary intervention (PCI).  
35  
36  
37  
38 • ROC curves were performed to extensively explore and compare the diagnostic  
39  
40 efficacies of MLR alone, NLR alone, high-sensitivity C-reactive protein (hs-CRP) alone,  
41  
42 brain natriuretic peptide (BNP) alone and their pairwise combinations in differentiating  
43  
44 MACE in NSTEMI patients.  
45  
46  
47 • MLR and NLR, non-invasive, simple, economical and feasible biomarkers, possess  
48  
49 practical clinical utility in the prognosis prediction of NSTEMI.  
50  
51  
52 • These findings need further multi-institutional with larger samples validation.  
53  
54  
55

## INTRODUCTION

Previous studies have verified that inflammatory response plays a vital role in the development of atherosclerosis and cardiovascular diseases.<sup>1 2</sup> White blood cell and its subtypes including neutrophils, monocytes and lymphocytes are important immune cells involved in the initiation, formation and destabilization of atherosclerosis.<sup>3</sup> Neutrophil-to-lymphocyte ratio (NLR) has been established as a cost-effective, feasible and reproducible inflammatory biomarker in many cardiovascular disorders, including acute coronary syndrome (ACS), angina pectoris and heart failure.<sup>4-6</sup> Elevated NLR has been reported as an independent predictor of major adverse cardiac events (MACE) in patients with ACS.<sup>7</sup> Monocytes can recruit to the artery wall, differentiate into macrophages and stimulate the activation of pro-inflammatory cytokines which play a crucial role at every level of the atherosclerotic process.<sup>8</sup> Monocyte-to-lymphocyte ratio (MLR) has emerged as a novel systematic inflammatory marker related with increased cardiovascular risk.<sup>9</sup> Recently, MLR has been reported to be associated with adverse clinical outcomes in various cardiovascular diseases.<sup>10-12</sup> However, the prognostic value of the combined usefulness of MLR and NLR in NSTEMI has not been evaluated. The aim of the present study was to investigate the combined usefulness of MLR and NLR in predicting MACE in patients with NSTEMI who underwent primary percutaneous coronary intervention (PCI).

## MATERIALS AND METHODS

### Study design, setting and participants

This retrospective longitudinal study was performed in Civil Aviation General Hospital,



1  
2  
3 Beijing, China. A total of 818 consecutive NSTEMI patients who presented to the emergency  
4 department and underwent primary PCI from July 2010 to July 2015 were considered for  
5 participation in this study. The NSTEMI was defined by typical ischemia symptoms,  
6 elevation level of cardiac troponin-I or creatine kinase-MB and no evidence of ST segment  
7 elevation in electrocardiography. We excluded patients who had serious heart failure (NYHA  
8 Class III or IV), rheumatic heart disease, valvar heart disease, congenital heart disease,  
9 pulmonary heart disease, active or chronic inflammatory conditions, acute infection,  
10 hemodynamic disorders, malignancies, severe renal [estimated glomerular filtration rate  
11 (eGFR) < 30 ml/min/1.73m<sup>2</sup>] or hepatic (alanine-aminotransferase > 40 U/l) disease, steroid  
12 therapy in the preceding 3 months, history of cerebrovascular vascular events or incomplete  
13 blood cell count or medical records. Hypertension was defined as current use of an  
14 antihypertensive medication or, a systolic blood pressure  $\geq$  140 mmHg and/or a diastolic  
15 blood pressure  $\geq$  90 mmHg. Diabetes mellitus was defined as active use of an antidiabetic  
16 agent, or fasting plasma glucose level  $\geq$  7.0 mmol/L or casual plasma glucose level  $\geq$  11.1  
17 mmol/L.

18  
19 This research was approved by the Ethical Committee of Civil Aviation General  
20 Hospital (CAGH-EC100201), and informed consent was obtained from all patients. The  
21 study was designed and performed in accordance with the Declaration of Helsinki.

### 22 23 24 **Study procedures and laboratory analysis**

25  
26 At the time of admission, venous blood samples were collected from each patient. All  
27 hematological and biochemical analyses were performed on fresh whole blood/plasma.

1  
2  
3 Plasma was obtained by centrifuging whole blood samples at 3000 rpm for 5 min. Complete  
4  
5  
6 blood counts and biochemical indicators were measured by the core laboratory of Civil  
7  
8  
9 Aviation General Hospital. Complete blood counts were performed using a SYSMEX  
10  
11 XE-2100 automated cell counter (Sysmex Corporation, Kobe, Japan). Complete blood counts  
12  
13 included hemoglobin, white blood cells, neutrophils, monocytes, lymphocytes, and platelets.  
14  
15 The biochemical indicators were determined using a Hitachi7600 automatic biochemistry  
16  
17 analyzer (Hitachi, Tokyo, Japan).The biochemical indicators included total cholesterol,  
18  
19 triglycerides, creatinine, low density lipoprotein (LDL), high density lipoprotein (HDL),  
20  
21 creatinine, high-sensitivity C-reactive protein (hs-CRP) , brain natriuretic peptide (BNP), and  
22  
23 Troponin I. eGFR was calculated using the Chronic Kidney Disease Epidemiology (CKD EPI)  
24  
25 creatinine equation. The MLR was calculated as the ratio of monocyte counts to lymphocyte  
26  
27 counts, and NLR was calculated as the ratio of neutrophil counts to lymphocyte counts.  
28  
29  
30  
31

32  
33 All patients received a loading dose of aspirin (300 mg) and clopidogrel (300 mg) at  
34  
35 least 6 hours before PCI, and an intravenous dose of heparin (70 to 100 U/kg) to maintain an  
36  
37 activated clotting time 250-300 seconds during the procedure. Primary PCI was performed  
38  
39 according to standard clinical practice by experienced cardiologists. A successful PCI was  
40  
41 defined as a residual stenosis less than 30% and final thrombolysis in myocardial infarction  
42  
43 (TIMI) II or III flow in the treated artery. Angiographic characteristics were collected for all  
44  
45 the patients.  
46  
47  
48  
49

### 50 51 **Clinical outcomes**

52  
53  
54 The main outcomes were MACE happened in-hospital and during the follow-up period,  
55

1  
2  
3 which were defined as a composite of all-cause mortality, cardiac death, stroke, non-fatal MI,  
4 target lesion revascularization (TLR) and target vessel revascularization (TVR) according to  
5 the Academic Research Consortium definition.<sup>13</sup> Cardiac death was defined as death resulting  
6 from any cardiac-related causes (eg, MI, heart failure, lethally cardiac arrhythmia). Nonfatal  
7 MI was defined based on the European Society of Cardiology, American Heart Association,  
8 American College of Cardiology, and World Heart Federation definitions.<sup>14</sup> TLR was defined  
9 as a repeat revascularization caused by a stenosis  $\geq 50\%$  within the stent or within a 5-mm  
10 proximal or distal to the stent. TVR was defined as a repeat coronary angioplasty or surgical  
11 bypass performed within the coronary artery containing the target lesion. Follow-up data  
12 were obtained by review of electronic medical records and/or telephone interview with the  
13 patients or patients' primary caregiver.

### 31 **Statistical analysis**

32 Kolmogorov-Smirnov test was employed to test the normality of the continuous variables in  
33 each group. Continuous variables distributed normally were expressed as mean  $\pm$  standard  
34 deviation (SD), while categorical data were expressed as numbers and percentage. We  
35 initially used ROC curves to determine the ability of MLR and NLR to differentiate MACE.  
36 Subsequently optimal cut-off values, specificity and sensitivity were derived. Based on the  
37 optimal cut-off values, participants were assigned into four groups: low MLR + low NLR  
38 group, low-MLR + high-NLR group, high-MLR + low-NLR group and high-MLR +  
39 high-NLR group. Continuous data differences between the four groups were compared using  
40 one-way ANOVA followed by Tukey's post hoc tests, while categorical data were compared

1  
2  
3 by Chi square tests. The MACE-free survival rates according to the cut-off values of MLR  
4  
5 and NLR were estimated by the Kaplan-Meier analysis and statistical differences were  
6  
7 carried out using the Log-rank test. Univariate and multivariate COX regression analyses  
8  
9 were carried out to identify the independent predictors of MACE. Variables with  $P < 0.10$  in  
10  
11 univariate analysis were selected for multivariate COX regression analysis. We constructed  
12  
13 two COX regression models (Model 1 and Model 2) with MACE as the dependent variable to  
14  
15 investigate the efficacy of MLR and NLR in predicting MACE. Model 1 was to estimate the  
16  
17 hazard ratio (HR) of MLR [low MLR = 0 (reference category), high MLR =1] and NLR [low  
18  
19 NLR =0 (reference category), high NLR =1] for MACE. Model 2 was to estimate the HR of  
20  
21 MLR in combination with NLR for MACE [low MLR + low NLR = 0 (reference category),  
22  
23 low-MLR + high-NLR = 1, high-MLR + low-NLR = 2, high-MLR + high-NLR group = 3].  
24  
25 The effect sizes were expressed as HR and their 95% confidence intervals (CI). Afterwards,  
26  
27 we used ROC curves to evaluate the diagnostic performance of individual biomarkers and  
28  
29 their pairwise combinations in predicting long-term MACE. The AUCs were compared by  
30  
31 Delong's tests. The statistical significance was considered as a 2-tailed  $P < 0.05$ . Statistical  
32  
33 analyses were performed using SPSS version 22.0 (SPSS Inc., Chicago, IL, USA).  
34  
35  
36  
37  
38  
39  
40  
41  
42

### 43 **Patient and Public Involvement**

44  
45  
46  
47 Patients and public were not involved in the design, recruitment, or conduct of this study.

48  
49 There is no plan for the study results to be disseminated directly to participants.

## 50 **RESULTS**

51  
52  
53  
54 818 patients were screened for inclusion for this study, while 91(11.12%) patients were

1  
2  
3 excluded because of the exclusion criteria and 49 (6.00%) patients were lost to the follow-up.  
4  
5  
6 Therefore, a total of 678 (82.89%) patients were included into the analysis, and the median  
7  
8 follow-up period was 26 (range: 1-30) months. **Figure 1** depicted the clinical layout of the  
9  
10  
11 study cohort.

### 12 13 14 15 **Baseline clinical characteristics**

16  
17  
18 A MLR cut-off value of 0.36 had a sensitivity of 54.74% and a specificity of 73.57%, while a  
19  
20 NLR cut-off value of 2.35 had a sensitivity of 77.37% and a specificity of 55.08% for  
21  
22 differentiating long-term MACE, via ROC analyses. According to the optimal cut-off values  
23  
24 of MLR 0.36 and NLR 2.35, participants were classified into four groups: low-MLR +  
25  
26 low-NLR group (MLR < 0.36, NLR < 2.35, n=319), low-MLR + high-NLR group (MLR <  
27  
28 0.36, NLR  $\geq$  2.35, n=126), high-MLR + low-NLR group (MLR  $\geq$  0.36, NLR < 2.35, n=102)  
29  
30 and high-MLR + high-NLR group (MLR  $\geq$  0.36, NLR  $\geq$  2.35, n=131). The clinical  
31  
32 characteristics were summarized in **Table 1**. The distribution of prior medications and  
33  
34 angiographic findings were similar between the four groups. However, patients in high-MLR  
35  
36 + high-NLR group were older, with higher Killip class and lower ejection fraction, and  
37  
38 showed higher levels of white blood cells, monocytes, neutrophils, LDL, hs-CRP ,BNP and  
39  
40 Troponin I, whereas they had lower levels of lymphocytes and hemoglobin.  
41  
42  
43  
44  
45  
46  
47

48  
49 **Table 1 Baseline clinical characteristics between the four groups based on the cut-off values of MLR and**  
50 **NLR**  
51

| Variable                           | Low-MLR      | Low-MLR       | High-MLR                   | High-MLR                    | P-value |
|------------------------------------|--------------|---------------|----------------------------|-----------------------------|---------|
|                                    | +            | +             | +                          | +                           |         |
|                                    | Low-NLR      | High-NLR      | Low-NLR                    | High-NLR                    |         |
|                                    | (n=319)      | (n=126)       | (n=102)                    | (n=131)                     |         |
| Age /(year)                        | 61.10±14.38  | 63.63±15.05   | 64.05±15.15                | 65.23±16.34*                | 0.036   |
| Male, n (%)                        | 209(65.52)   | 71(56.35)     | 65(63.73)                  | 90(68.70)                   | 0.188   |
| Family history, n (%)              | 33(10.34)    | 17(13.49)     | 11(10.78)                  | 20(15.27)                   | 0.463   |
| Hypertension, n(%)                 | 221(69.28)   | 86(68.25)     | 73(71.57)                  | 105(80.15)                  | 0.100   |
| Diabetes Mellitus, n(%)            | 125(39.18)   | 56(44.44)     | 39(38.24)                  | 59(45.04)                   | 0.522   |
| Dyslipidemia, n (%)                | 114(35.74)   | 51(40.48)     | 35(34.31)                  | 49(37.40)                   | 0.758   |
| Current Smoker, n (%)              | 108(33.86)   | 45(35.71)     | 33(32.35)                  | 51(38.93)                   | 0.702   |
| Killip class (> I)                 | 192(60.19)   | 86(68.25)     | 69(67.65)                  | 99(75.57)*                  | 0.015   |
| Ejection fraction (%)              | 65.80±10.05  | 66.52±10.11   | 65.26±10.23                | 62.98±10.01*                | 0.044   |
| <b>Laboratory parameters</b>       |              |               |                            |                             |         |
| White blood cell, ×10 <sup>9</sup> | 6.67±1.72    | 6.77±2.03     | 7.06±1.98*                 | 7.25±2.11*                  | 0.027   |
| Neutrophil, ×10 <sup>9</sup>       | 4.26±1.07    | 4.69±1.19*    | 4.56±1.15*                 | 5.08±1.27* <sup>##</sup>    | <0.001  |
| Lymphocyte, ×10 <sup>9</sup>       | 2.31±0.53    | 1.98±0.51*    | 2.37±0.67 <sup>+</sup>     | 2.02±0.64* <sup>##</sup>    | <0.001  |
| Monocyte, ×10 <sup>9</sup>         | 0.18±0.09    | 0.22±0.11*    | 0.49±0.19* <sup>+</sup>    | 0.46±0.13* <sup>+</sup>     | <0.001  |
| Hemoglobin/(g/L)                   | 136.7±30.38  | 129.6±27.57*  | 133.7±39.76                | 127.4±36.01*                | 0.039   |
| Total cholesterol /(mmol/L)        | 5.70±1.47    | 5.95±1.49     | 5.52±1.35                  | 5.69±1.36                   | 0.130   |
| Triglycerides /(mmol/L)            | 1.67±0.56    | 1.63±0.54     | 1.77±0.59                  | 1.61±0.54                   | 0.109   |
| LDL/(mmol/L)                       | 2.86±0.95    | 3.10±1.08*    | 2.93±1.12*                 | 3.35±1.06* <sup>##</sup>    | <0.001  |
| HDL/(mmol/L)                       | 1.31±0.51    | 1.43±0.57     | 1.37±0.49                  | 1.44±0.51                   | 0.059   |
| hs-CRP/( mg/dL)                    | 1.85±0.71    | 2.14±0.98*    | 2.88±0.77* <sup>+</sup>    | 3.13±1.02* <sup>##</sup>    | <0.001  |
| Creatinine /(umol/L)               | 112.38±29.2  | 106.49±30     | 112.72±37.44               | 107.62±34.02                | 0.203   |
| eGFR/(ml/min/1.73m <sup>2</sup> )  | 85.71±29.12  | 81.85±28.71   | 78.92±26.31                | 81.28±27.09                 | 0.101   |
| BNP/(pg/ml)                        | 265.12±85.39 | 245.58±79.28* | 269.71±76.56* <sup>+</sup> | 298.73±76.56* <sup>##</sup> | <0.001  |
| Troponin I (ng/mL)                 | 5.89±2.51    | 7.52±3.52*    | 7.65±3.79*                 | 11.08±4.18* <sup>##</sup>   | <0.001  |
| <b>Medical Treatment</b>           |              |               |                            |                             |         |
| Aspirin, n(%)                      | 309(96.87)   | 119(94.44)    | 96(94.12)                  | 129(98.47)                  | 0.202   |
| Anticoagulant, n(%)                | 305(95.61)   | 117(92.86)    | 93(91.18)                  | 124(94.66)                  | 0.340   |
| Statin, n(%)                       | 292(91.54)   | 112(88.89)    | 90(88.24)                  | 121(92.37)                  | 0.589   |
| ACEI or ARB, n(%)                  | 186(58.31)   | 71(56.35)     | 61(59.8)                   | 84(64.12)                   | 0.602   |
| Beta-blocker, n(%)                 | 259(81.19)   | 98(77.78)     | 86(84.31)                  | 105(80.15)                  | 0.654   |

|                                        |            |           |           |            |       |
|----------------------------------------|------------|-----------|-----------|------------|-------|
| Calcium-channel blockers, n(%)         | 67(21.00)  | 30(23.81) | 26(25.49) | 28(21.37)  | 0.767 |
| Nitrate drugs, n(%)                    | 257(80.56) | 96(76.19) | 75(73.53) | 106(80.92) | 0.369 |
| <b>Angiographic Findings</b>           |            |           |           |            |       |
| Number of diseased vessels             |            |           |           |            | 0.145 |
| one-vessel, n(%)                       | 182(57.05) | 65(51.59) | 54(52.94) | 57(43.51)  |       |
| two-vessel, n(%)                       | 76(23.82)  | 39(30.95) | 32(31.37) | 42(32.06)  |       |
| three-vessel/ Left main, n(%)          | 61(19.12)  | 22(17.46) | 16(15.69) | 32(24.43)  |       |
| Number of Implanted Stents             | 1.95±0.79  | 2.01±0.85 | 2.11±0.94 | 2.15±1.01  | 0.125 |
| Total stent length/(mm)                | 39.6±24.1  | 37.2±21.9 | 35.8±26.3 | 41.9±22.2  | 0.190 |
| Stent diameter/(mm)                    | 2.59±1.33  | 2.85±1.09 | 2.84±1.27 | 2.68±1.16  | 0.114 |
| Moderate or severe tortuosity, n(%)    | 27(8.46)   | 16(12.70) | 11(10.78) | 14(10.69)  | 0.575 |
| Moderate or severe calcification, n(%) | 29(9.09)   | 14(11.11) | 13(12.75) | 15(11.45)  | 0.706 |

\*: compared with low-MLR + low-NLR group, p<0.05;

+: compared with low-MLR+ high-NLR group, p<0.05;

#: compared with high-MLR+ low-NLR group, p<0.05.

ACEI, angiotensin-converting enzyme inhibitor; ARB, angiotensin receptor blocker; BNP, brain natriuretic peptide; eGFR, estimated glomerular filtration rate; HDL, high-density lipoprotein; hs-CRP, high-sensitivity C-reactive protein; LDL, low-density lipoprotein; MLR, monocyte-to-lymphocyte ratio; NLR, neutrophil-to-lymphocyte ratio.

### Clinical outcomes

During the median follow-up period of 26 months, long-term MACE were observed in 139 (20.50%) patients. 10 (1.47%) patients died, 40 (5.90%) patients had a non-fatal MI, 24(3.54%) patients experienced stroke, 61(9.00%) patients underwent TLR and 4 (0.59%) patients underwent TVR. Overall, the patients in the high-MLR + high-NLR group had higher MACE rate, compared to the other three groups. The mortality, non-fatal MI, stroke and TLR were significantly higher in patients with high-MLR + high-NLR, than those with either lower MLR or lower NLR, whereas the four groups had similar TVR (**Table 2**).

The Kaplan-Meier curves based on the cut-off value of MLR and NLR, were presented

in **Figure 2A** and **Figure 2B**, respectively. Significantly increased long-term MACE rates were observed in patients with high MLR (33.48% vs. 13.71%,  $P < 0.001$ , **Figure 2A**) and in patients with high NLR (31.52% vs. 13.78%,  $P < 0.001$ , **Figure 2B**). The Kaplan-Meier MACE-free curve based on the combined markers was shown in **Figure 2C**. The MACE rates were significantly different among the four groups ( $P < 0.001$ ) and patients in high-MLR + high-NLR group had the highest MACE rate.

**Table 2 Clinical outcomes between the four groups based on the cut-off values of MLR and NLR**

| Variable                       | Low-MLR  | Low-MLR    | High-MLR   | High-MLR     | P-value |
|--------------------------------|----------|------------|------------|--------------|---------|
|                                | +        | +          | +          | +            |         |
|                                | Low-NLR  | High-NLR   | Low-NLR    | High-NLR     |         |
|                                | (n=319)  | (n=126)    | (n=102)    | (n=131)      |         |
| <b>Follow-up 2 years, n(%)</b> | 30(9.40) | 31(24.60)* | 28(27.45)* | 50(38.17)*+# | <0.001  |
| All- cause death, n(%)         | 2(0.63)  | 1(0.79)    | 1(0.98)    | 6(4.58)*     | 0.010   |
| Cardiac death, n(%)            | 1(0.31)  | 1(0.79)    | 1(0.98)    | 5(3.82)*     | 0.018   |
| Nonfatal MI, n(%)              | 9(2.82)  | 8(6.35)    | 9(8.82)*   | 14(10.69)*   | 0.006   |
| Stroke, n(%)                   | 4(1.25)  | 6(4.76)*   | 5(4.9)*    | 9(6.87)*     | 0.017   |
| TLR, n(%)                      | 14(4.39) | 16(12.70)* | 12(11.76)* | 19(14.50)*   | 0.001   |
| TVR, n(%)                      | 1(0.31)  | 0(0)       | 1(0.98)    | 2(1.53)      | 0.335   |

\*: compared with low-MLR + low-NLR group,  $p < 0.05$ ;

+: compared with low-MLR + high-NLR group,  $p < 0.05$ ;

#: compared with high-MLR + low-NLR group,  $p < 0.05$ .

MI, myocardial infarction; TLR, target lesion revascularization; TVR, target vessel revascularization.

### Independent predictors of long-term MACE

Univariate and multivariate COX regression analyses were utilized to determine the independent predictors of long-term MACE in patients with NSTEMI undergoing primary PCI. In univariate COX analysis, white blood cells, neutrophils, lymphocytes, monocytes,



MLR, NLR, LDL, hs-CRP, BNP, and Troponin I were found to be significantly associated with long-term MACE (see online supplementary **Table S1**). After adjusting for covariates, both MLR (HR 2.128, 95% CI: 1.458-3.105,  $P < 0.001$ ) and NLR (HR 1.925, 95% CI: 1.385-2.676,  $P < 0.001$ ) were found to be significant predictors of long-term MACE in multivariate COX regression. Moreover, the combination of MLR and NLR was found to be an independent predictor of long-term MACE (HR 4.055, 95% CI: 2.550-6.448,  $P < 0.001$  for patients with high-MLR + high NLR vs. patients with low-MLR + low-NLR). In addition to MLR and NLR, hs-CRP and BNP were also independent predictors of long-term MACE in patients with NSTEMI undergoing primary PCI (**Table 3**). The details of multivariate COX regression analyses were presented in online supplementary **Table S2**.

**Table 3 Independent predictors of long-term MACE in patients with NSTEMI by multivariate COX regression analyses**

| Variable                   | Hazard Ratio | 95% Confidence Interval | P value |
|----------------------------|--------------|-------------------------|---------|
| <b>Model 1</b>             |              |                         |         |
| MLR                        |              |                         |         |
| Low MLR, MLR<0.36          | Ref          |                         |         |
| High MLR, MLR $\geq$ 0.36  | 2.128        | 1.458-3.105             | <0.001  |
| NLR                        |              |                         |         |
| Low NLR, NLR<2.15          | Ref          |                         |         |
| High NLR, NLR $\geq$ 2.15  | 1.925        | 1.385-2.676             | <0.001  |
| hs-CRP                     | 1.747        | 1.173-2.601             | 0.006   |
| BNP                        | 1.950        | 1.156-3.290             | 0.012   |
| <b>Model 2</b>             |              |                         |         |
| Combination of MLR and NLR |              |                         |         |
| Low-MLR + Low-NLR          | Ref          | -                       | -       |
| Low-MLR + High-NLR         | 2.732        | 1.417-5.268             | 0.003   |
| High-MLR + Low-NLR         | 3.004        | 1.519-5.940             | 0.002   |

|                     |       |             |        |
|---------------------|-------|-------------|--------|
| High-MLR + High-NLR | 4.055 | 2.550-6.448 | <0.001 |
| hs-CRP              | 1.576 | 1.058-2.349 | 0.025  |
| BNP                 | 1.874 | 1.137-3.088 | 0.014  |

BNP, brain natriuretic peptide; hs-CRP, high-sensitivity C-reactive protein; MLR, monocyte-to-lymphocyte ratio; NLR, neutrophil-to-lymphocyte ratio.

### Diagnostic efficacy of MLR in combination with NLR in differentiating MACE

ROC curves were used to evaluate and compare the predictive performance of MLR in combination with NLR with (i) MLR, NLR, hs-CRP and BNP alone, and (ii) all other pairwise combinations of the four biomarkers, for differentiating long-term MACE. **Figure 3A** showed that MLR in combination with NLR (AUC: 0.715, 95%CI: 0.679-0.748) achieved better performance in predicting long-term MACE, than MLR (AUC: 0.683, 95%CI: 0.647-0.718), NLR (AUC: 0.646, 95%CI: 0.609-0.682), hs-CRP (AUC: 0.642, 95%CI: 0.593-0.691) and BNP alone (AUC: 0.633, 95%CI: 0.583-0.682) (All *P* values < 0.05), whereas there was no statistical difference among the four individual biomarkers in AUC values. Additionally, MLR in combination with NLR showed similar performance to all other pairwise combinations of the four biomarkers (All *P* values  $\geq$  0.05, **Figure 3B**).

## DISCUSSION

In this study, there were 139 of 678 patients (20.50%) presented with MACE, during the follow-up period. The MACE rate was comparable between our study and the previous study (21.62%)<sup>15</sup>. The novel finding of the present study was that elevated MLR and NLR were independently associated with adverse clinical outcomes in patients with NSTEMI. Moreover, the study demonstrated for the first time that the combination of MLR with NLR has stronger predictive potential for long-term MACE in patients with NSTEMI undergoing primary PCI,

1  
2  
3 compared with individual MLR or NLR.  
4

5  
6 Many compelling studies have clearly indicated that NLR can be a reliable prognostic  
7  
8 factor for short and long-term adverse outcomes in patients with acute coronary syndrome  
9  
10 undergoing PCI.<sup>16 17</sup> Neutrophils, the most abundant white blood cells in the circulation, are  
11  
12 actively involved in the atherogenesis and plaque destabilization.<sup>18 19</sup> Several mechanisms can  
13  
14 probably explain the pivotal role of neutrophils in atherosclerosis: (1) Neutrophils can  
15  
16 infiltrate coronary atherosclerotic plaques and the infarcted myocardium, and mediate tissue  
17  
18 damage by releasing matrix-degrading enzymes and reactive oxygen species; (2) Increases in  
19  
20 neutrophil counts can aggravate endothelial dysfunction, modulate microvascular  
21  
22 permeability and contribute to foam cell formation; (3) Neutrophils can promote endothelial  
23  
24 erosion, weaken fibrous cap and accelerate neointima formation which contribute to plaque  
25  
26 destabilization.<sup>20-23</sup> Lymphocytes are an integral part of the immune system, which participate  
27  
28 in every phase of atherosclerosis. Lymphocytopenia, resulting from increased lymphocytes  
29  
30 apoptosis, contributes to atherosclerotic plaque growth, lipid core development, plaque  
31  
32 destabilization, post-infarct cardiac remodeling and progression.<sup>3 24</sup> Lower lymphocyte count  
33  
34 was reported to be not only an early marker of acute myocardial infarction, but also  
35  
36 associated with worse cardiovascular outcomes.<sup>25 26</sup> Obviously, it could be concluded that  
37  
38 NLR, a composite marker of neutrophils and lymphocytes, can provide prognostic value in  
39  
40 ACS patients. In agreement with previous evidence, our study confirmed the prognostic role  
41  
42 of increased NLR in patients with NSTEMI.  
43  
44  
45  
46  
47  
48  
49  
50  
51

52 MLR, a novel hematological marker, has been recently reported as a prognostic factor in  
53  
54 many diseases, especially various malignancies.<sup>27 28</sup> To date, just a few studies have  
55  
56

1  
2  
3 attempted to elucidate the impact of MLR on cardiovascular disease. In our previous studies,  
4  
5  
6 MLR had the potential in assessing coronary lesion severity,<sup>9</sup> and identifying the vulnerable  
7  
8  
9 plaques in patients with stable angina.<sup>29</sup> Siva et al. showed that increased MLR level was  
10  
11 associated with higher mortality in patients with acute heart failure.<sup>10</sup> Kiris et al. reported that  
12  
13 elevated MLR level was independently associated with a higher risk of six-month mortality  
14  
15 in patients with STEMI undergoing primary PCI.<sup>11</sup> Gijsberts et al. found that MLR  
16  
17 significantly improved mortality prediction in coronary angiography patients.<sup>12</sup> Thus, a high  
18  
19 MLR was associated with adverse cardiac clinical outcomes, though fewer studies have been  
20  
21 performed for MLR and cardiac prognosis, compared to those for NLR. Monocytes play an  
22  
23 essential role in every stage of atherosclerosis.<sup>30</sup> They can recruit to the artery wall,  
24  
25 differentiate into macrophages and stimulate activating the secretion of pro-inflammatory  
26  
27 cytokines.<sup>8</sup> Compared with neutrophils, monocytes can produce higher levels of cytokines.<sup>31</sup>  
28  
29 Recent pathological studies have found that monocytes can replace neutrophils and become  
30  
31 the prominent infiltrating leukocytes within 48 h after the onset of myocardial ischemia.<sup>32</sup> On  
32  
33 the other hand, myocardial infarction may liberate hematopoietic stem and progenitor cells  
34  
35 from bone marrow niches which could increase the availability of monocytes.<sup>33</sup> Therefore,  
36  
37 MLR, being an integrated reflection of two important immune cells, could be a potentially  
38  
39 prognostic factor for acute coronary syndrome, and the present study confirmed the  
40  
41 hypothesis. Our results revealed that MLR was an independent predictor of long-term MACE  
42  
43 and had comparable diagnostic ability as NLR for long-term MACE in patients with  
44  
45 NSTEMI undergoing primary PCI. Compared with STEMI, NSTEMI is much more common  
46  
47 and tends to have an increased mortality in the year following the myocardial infarction.<sup>34</sup>  
48  
49  
50  
51  
52  
53  
54  
55

1  
2  
3 Furthermore, we evaluated the combined usefulness of MLR and NLR for predicting  
4 long-term MACE in patients with NSTEMI undergoing primary PCI. Our results showed that  
5  
6 the combination of MLR with NLR was an independent predictor, more predictive than  
7  
8 individual markers, in predicting the long-term MACE in patients with NSTEMI.  
9  
10  
11  
12

13 In addition, our study found that hs-CRP and BNP were also independent predictors of  
14 long-term MACE in patients with NSTEMI undergoing primary PCI. Hs-CRP and BNP were  
15 classical biomarkers correlated with cardiovascular risk and prognosis. A recent  
16 meta-analysis of 14 studies concluded that elevated hs-CRP could predict the risk of  
17 cardiovascular mortality in the general population.<sup>35</sup> Cho KI et al. showed that an increased  
18 hs-CRP level was a significant independent predictor of long-term adverse events in patients  
19 with NSTEMI/unstable angina.<sup>15</sup> BNP has been established as a biomarker in vascular  
20 diseases used for monitoring disease progression. Porapakkham et al. performed a  
21 meta-analysis of eight randomized clinical trials and indicated that BNP could be used for  
22 guiding the treatment of chronic heart failure,<sup>36</sup> while Klok et al. conducted a meta-analysis  
23 of 13 studies and revealed the prognostic value of BNP in patients with pulmonary  
24 embolism.<sup>37</sup> In patients with NSTEMI, Fukazawa et al. showed that an increased  
25 concentration of BNP at admission was closely associated with poor prognosis.<sup>38</sup> Our study  
26 suggested that in addition to MLR and NLR, hs-CRP and BNP are also independent  
27 prognostic factors of long-term MACE in patients with NSTEMI undergoing primary PCI.  
28 Besides, compared with hs-CRP and BNP, the combined usefulness of MLR and NLR was  
29 with higher HR. ROC curves revealed that MLR in combination with NLR was superior to  
30 either MLR, NLR, hs-CRP or BNP alone in predicting long-term MACE, and it had similar  
31  
32  
33  
34  
35  
36  
37  
38  
39  
40  
41  
42  
43  
44  
45  
46  
47  
48  
49  
50  
51  
52  
53  
54  
55  
56  
57  
58  
59  
60

1  
2  
3 performance to all other pairwise combinations of the four biomarkers. Moreover, the  
4  
5 measurement of MLR and NLR could be more cost-effectiveness and easily accessible in  
6  
7 clinical practice, which would possess practical clinical utility in the prognosis prediction of  
8  
9  
10  
11 NSTEMI.

12  
13 This study had several limitations. Firstly, this study comprised of a modest sample size  
14  
15 which may introduce selection bias. The single center study was lack of external validation.  
16  
17 Thus, these findings need further multi-institutional with larger samples validation. Secondly,  
18  
19 we evaluated the MLR and NLR on admission of the hospital, but didn't assess their dynamic  
20  
21 changes during the follow-up period. Thirdly, inflammatory biomarkers such as  
22  
23 myeloperoxidase, interleukin-6 and tumor necrosis factor were not analyzed in our patients.  
24  
25 Finally, several scoring systems, for example, the HEART Score, have been developed to risk  
26  
27 stratify patients with ACS and reported to be associated with patients' prognosis. It would be  
28  
29 of interest to investigate the additive value of MLR/NLR to the scoring systems, but this is  
30  
31 beyond the scope of this study. Notwithstanding these limitations, this study firstly reported  
32  
33 the prognostic value of the combination of MLR with NLR in patients with NSTEMI.  
34  
35  
36  
37  
38  
39

40 In conclusion, the combined usefulness of MLR with NLR gains a prognostic value in  
41  
42 patients with NSTEMI, which could be used to identify the high risk patients with poor  
43  
44 outcomes and adjust their treatment accordingly. These findings provide a new perspective  
45  
46 on the non-invasive, simple, economical and feasible biomarkers in predicting long-term  
47  
48 MACE in patients with NSTEMI.  
49  
50  
51  
52  
53

54  
55 **Contributors** ZF made the major contribution to the conception and design of the study, and

1  
2  
3 drafted the manuscript. YL and HJ contributed to the data acquisition and performed the  
4  
5 statistical analyses. XJ revised the manuscript. XJ is the guarantor of the study. All authors  
6  
7 read and approved the final manuscript prior to the submission.  
8  
9

10 **Funding statement** This research received no specific grant from any funding agency in the  
11  
12 public, commercial or not-for-profit sectors.  
13  
14

15 **Competing interests** None declared.  
16  
17

18 **Ethics approval** This research was approved by the ethics committee of the Ethical  
19  
20 Committee of Civil Aviation General Hospital (CAGH-EC100201). The study was designed  
21  
22 and performed in accordance with the Declaration of Helsinki.  
23  
24

25 **Data Sharing Statement** Raw data can be obtained by contacting the corresponding author.  
26  
27

## 28 REFERENCES

- 29 1. Murtagh BM, Anderson HV. Inflammation and atherosclerosis in acute coronary  
30 syndromes. *J Invasive Cardiol* 2004;16(7):377-84.
- 31 2. Nahrendorf M, Swirski FK. Immunology. Neutrophil-macrophage communication in  
32 inflammation and atherosclerosis. *Science* 2015;349(6245):237-8. doi:  
33 10.1126/science.aac7801
- 34 3. Horne BD, Anderson JL, John JM, et al. Which white blood cell subtypes predict increased  
35 cardiovascular risk? *J Am Coll Cardiol* 2005;45(10):1638-43. doi:  
36 10.1016/j.jacc.2005.02.054
- 37 4. Arbel Y, Finkelstein A, Halkin A, et al. Neutrophil/lymphocyte ratio is related to the  
38 severity of coronary artery disease and clinical outcome in patients undergoing  
39 angiography. *Atherosclerosis* 2012;225(2):456-60. doi:  
40 10.1016/j.atherosclerosis.2012.09.009 %/ Copyright (c) 2012 Elsevier Ireland Ltd. All  
41 rights reserved.
- 42 5. Gul M, Uyarel H, Ergelen M, et al. Predictive value of neutrophil to lymphocyte ratio in  
43 clinical outcomes of non-ST elevation myocardial infarction and unstable angina  
44 pectoris: a 3-year follow-up. *Clin Appl Thromb Hemost* 2014;20(4):378-84. doi:  
45 10.1177/1076029612465669
- 46 6. Kurtul A, Yarlioglues M, Duran M, et al. Association of Neutrophil-to-lymphocyte Ratio  
47 with Contrast-induced Nephropathy in Patients with Non-ST-elevation Acute  
48 Coronary Syndrome Treated with Percutaneous Coronary Intervention. *Heart Lung*  
49 *Circ* 2016;25(7):683-90. doi: 10.1016/j.hlc.2016.01.007 %/ Copyright (c) 2016  
50  
51  
52  
53  
54  
55

- Australian and New Zealand Society of Cardiac and Thoracic Surgeons (ANZSCTS) and the Cardiac Society of Australia and New Zealand (CSANZ). Published by Elsevier B.V. All rights reserved.
7. Azab B, Zaher M, Weiserbs KF, et al. Usefulness of neutrophil to lymphocyte ratio in predicting short- and long-term mortality after non-ST-elevation myocardial infarction. *Am J Cardiol* 2010;106(4):470-6. doi: 10.1016/j.amjcard.2010.03.062
  8. Ley K, Miller YI, Hedrick CC. Monocyte and macrophage dynamics during atherogenesis. *Arterioscler Thromb Vasc Biol* 2011;31(7):1506-16. doi: 10.1161/atvbaha.110.221127
  9. Ji H, Li Y, Fan Z, et al. Monocyte/lymphocyte ratio predicts the severity of coronary artery disease: a syntax score assessment. *BMC Cardiovasc Disord* 2017;17(1):90. doi: 10.1186/s12872-017-0507-4
  10. Silva N, Bettencourt P, Guimaraes JT. The lymphocyte-to-monocyte ratio: an added value for death prediction in heart failure. *Nutr Metab Cardiovasc Dis* 2015;25(11):1033-40. doi: 10.1016/j.numecd.2015.07.004 %/ Copyright (c) 2015 The Italian Society of Diabetology, the Italian Society for the Study of Atherosclerosis, the Italian Society of Human Nutrition, and the Department of Clinical Medicine and Surgery, Federico II University. Published by Elsevier B.V. All rights reserved.
  11. Kiris T, Celik A, Varis E, et al. Association of Lymphocyte-to-Monocyte Ratio With the Mortality in Patients With ST-Elevation Myocardial Infarction Who Underwent Primary Percutaneous Coronary Intervention. *Angiology* 2017;3319716685480. doi: 10.1177/0003319716685480
  12. Gijssberts CM, Ellenbroek GH, Ten Berg MJ, et al. Routinely analyzed leukocyte characteristics improve prediction of mortality after coronary angiography. *Eur J Prev Cardiol* 2016;23(11):1211-20. doi: 10.1177/2047487315621832
  13. Cutlip DE, Windecker S, Mehran R, et al. Clinical end points in coronary stent trials: a case for standardized definitions. *Circulation* 2007;115(17):2344-51. doi: 10.1161/circulationaha.106.685313
  14. Paiva L, Providencia R, Barra S, et al. Universal definition of myocardial infarction: clinical insights. *Cardiology* 2015;131(1):13-21. doi: 10.1159/000371739 %/ (c) 2015 S. Karger AG, Basel.
  15. Cho KI, Ann SH, Singh GB, et al. Combined Usefulness of the Platelet-to-Lymphocyte Ratio and the Neutrophil-to-Lymphocyte Ratio in Predicting the Long-Term Adverse Events in Patients Who Have Undergone Percutaneous Coronary Intervention with a Drug-Eluting Stent. *PLoS One* 2015;10(7):e0133934. doi: 10.1371/journal.pone.0133934
  16. Park JJ, Jang HJ, Oh IY, et al. Prognostic value of neutrophil to lymphocyte ratio in patients presenting with ST-elevation myocardial infarction undergoing primary percutaneous coronary intervention. *Am J Cardiol* 2013;111(5):636-42. doi: 10.1016/j.amjcard.2012.11.012 %/ Copyright (c) 2013 Elsevier Inc. All rights reserved.
  17. Sawant AC, Adhikari P, Narra SR, et al. Neutrophil to lymphocyte ratio predicts short- and long-term mortality following revascularization therapy for ST elevation myocardial infarction. *Cardiol J* 2014;21(5):500-8. doi: 10.5603/CJ.a2013.0148



18. Amulic B, Cazalet C, Hayes GL, et al. Neutrophil function: from mechanisms to disease. *Annu Rev Immunol* 2012;30:459-89. doi: 10.1146/annurev-immunol-020711-074942
19. Strydom N, Rankin SM. Regulation of circulating neutrophil numbers under homeostasis and in disease. *J Innate Immun* 2013;5(4):304-14. doi: 10.1159/000350282 %/ Copyright (c) 2013 S. Karger AG, Basel.
20. Naruko T, Ueda M, Haze K, et al. Neutrophil infiltration of culprit lesions in acute coronary syndromes. *Circulation* 2002;106(23):2894-900.
21. Abou-Raya A, Abou-Raya S. Inflammation: a pivotal link between autoimmune diseases and atherosclerosis. *Autoimmun Rev* 2006;5(5):331-7. doi: 10.1016/j.autrev.2005.12.006
22. Iadecola C, Anrather J. The immunology of stroke: from mechanisms to translation. *Nat Med* 2011;17(7):796-808. doi: 10.1038/nm.2399
23. Soehnlein O. Multiple roles for neutrophils in atherosclerosis. *Circ Res* 2012;110(6):875-88. doi: 10.1161/circresaha.111.257535
24. Blum A. Role of lymphocytes in heart disease. *Circulation* 1998;98(15):1590.
25. Tamhane UU, Aneja S, Montgomery D, et al. Association between admission neutrophil to lymphocyte ratio and outcomes in patients with acute coronary syndrome. *Am J Cardiol* 2008;102(6):653-7. doi: 10.1016/j.amjcard.2008.05.006
26. Tang TT, Yuan J, Zhu ZF, et al. Regulatory T cells ameliorate cardiac remodeling after myocardial infarction. *Basic Res Cardiol* 2012;107(1):232. doi: 10.1007/s00395-011-0232-6
27. Nishijima TF, Muss HB, Shachar SS, et al. Prognostic value of lymphocyte-to-monocyte ratio in patients with solid tumors: A systematic review and meta-analysis. *Cancer Treat Rev* 2015;41(10):971-8. doi: 10.1016/j.ctrv.2015.10.003 %/ Copyright (c) 2015 Elsevier Ltd. All rights reserved.
28. Gu L, Li H, Chen L, et al. Prognostic role of lymphocyte to monocyte ratio for patients with cancer: evidence from a systematic review and meta-analysis. *Oncotarget* 2016;7(22):31926-42. doi: 10.18632/oncotarget.7876
29. Fan Z, Ji H, Li Y, et al. Relationship between monocyte-to-lymphocyte ratio and coronary plaque vulnerability in patients with stable angina. *Biomarkers in medicine* 2017;11(11):979-90. doi: 10.2217/bmm-2017-0235
30. Auffray C, Sieweke MH, Geissmann F. Blood monocytes: development, heterogeneity, and relationship with dendritic cells. *Annu Rev Immunol* 2009;27:669-92. doi: 10.1146/annurev.immunol.021908.132557
31. Ramsay SC, Maggs JA, Ketheesan N, et al. Relative uptake of technetium 99m stannous colloid by neutrophils and monocytes is altered by gram-negative infection. *Nuclear medicine and biology* 2005;32(1):101-07.
32. Freytes DO, Santambrogio L, Vunjak-Novakovic G. Optimizing dynamic interactions between a cardiac patch and inflammatory host cells. *Cells Tissues Organs* 2012;195(1-2):171-82.
33. Dutta P, Courties G, Wei Y, et al. Myocardial infarction accelerates atherosclerosis. *Nature* 2012;487(7407):325-9. doi: 10.1038/nature11260
34. Fine DH. Methods for diagnosing and treating a heart condition in a patient: Google

- 1  
2  
3 Patents %\ 2017-08-26 22:07:00, 2009.
- 4 35. Li Y, Zhong X, Cheng G, et al. Hs-CRP and all-cause, cardiovascular, and cancer  
5 mortality risk: A meta-analysis. *Atherosclerosis* 2017;259:75-82. doi:  
6 10.1016/j.atherosclerosis.2017.02.003 %/ Copyright (c) 2017 Elsevier B.V. All rights  
7 reserved.  
8
- 9 36. Porapakkham P, Porapakkham P, Zimmet H, et al. B-type natriuretic peptide-guided heart  
10 failure therapy: A meta-analysis. *Arch Intern Med* 2010;170(6):507-14. doi:  
11 10.1001/archinternmed.2010.35  
12
- 13 37. Klok FA, Mos IC, Huisman MV. Brain-type natriuretic peptide levels in the prediction of  
14 adverse outcome in patients with pulmonary embolism: a systematic review and  
15 meta-analysis. *Am J Respir Crit Care Med* 2008;178(4):425-30. doi:  
16 10.1164/rccm.200803-459OC  
17
- 18 38. Fukazawa S, Teruya K, Uemura T, et al. The relationship between long-term changes in  
19 plasma B-type natriuretic peptide levels and electrocardiographic findings. *Environ*  
20 *Health Prev Med* 2008;13(3):156-61. doi: 10.1007/s12199-008-0027-z  
21  
22

### 23 Figure Legend

24  
25  
26 **Figure 1.** Flow Chart of the study cohort. The flow chart presents the selection criteria of the  
27 study and the clinical layout of the study population.  
28

29  
30  
31 **Figure 2.** Kaplan-Meier cumulative MACE-free curves in patients with NSTEMI (A)  
32 according to the cut-off value of MLR; (B) according to the cut-off value of NLR; (C)  
33 according to MLR combined with NLR.  
34  
35  
36

37  
38 **Figure 3.** Receiver-operating characteristic curves showing area under the curve for (A)  
39 MLR in combination with NLR (MLR+NLR), MLR alone, NLR alone, hs-CRP alone and  
40 BNP alone; (B) MLR+NLR, MLR in combination with hs-CRP (MLR+hs-CRP), MLR in  
41 combination with BNP (MLR+BNP), NLR in combination with hs-CRP (NLR+hs-CRP),  
42 NLR in combination with BNP (NLR+BNP) and hs-CRP in combination with BNP  
43 (hs-CRP+BNP); for long-term MACE in NSTEMI patients.  
44  
45  
46  
47  
48  
49  
50  
51  
52  
53  
54  
55

1  
2  
3  
4  
5  
6  
7  
8  
9  
10  
11  
12  
13  
14  
15  
16  
17  
18  
19  
20  
21  
22  
23  
24  
25  
26  
27  
28  
29  
30  
31  
32  
33  
34  
35  
36  
37  
38  
39  
40  
41  
42  
43  
44  
45  
46  
47  
48  
49  
50  
51  
52  
53  
54  
55  
56  
57  
58  
59  
60

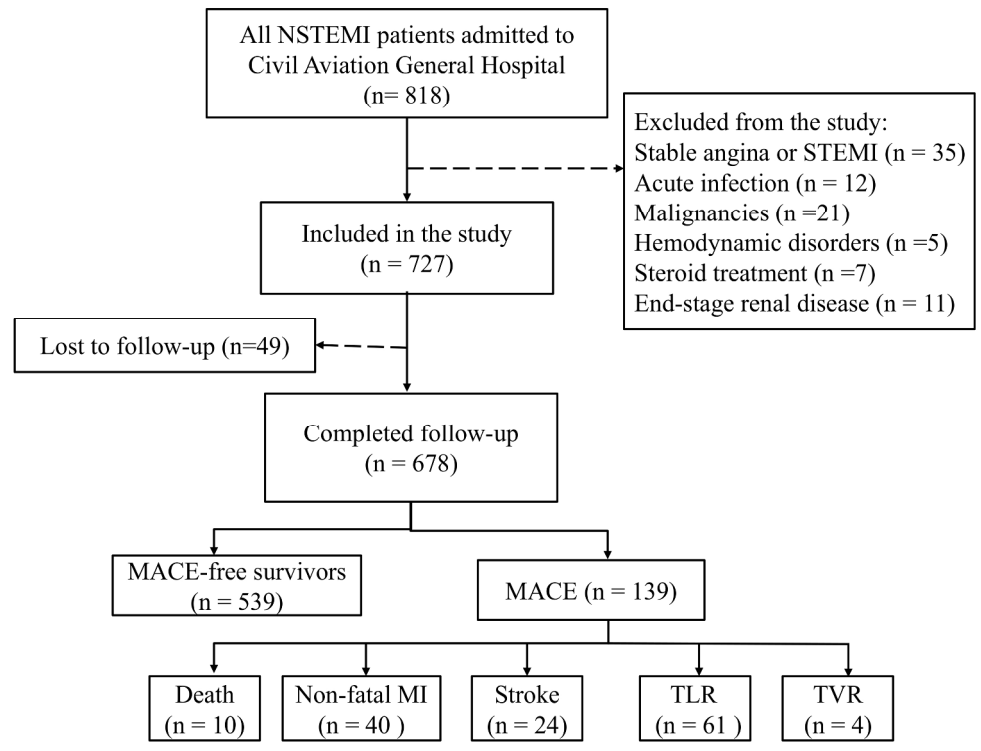

Figure 1. Flow Chart of the study cohort. The flow chart presents the selection criteria of the study and the clinical layout of the study population.

254x190mm (300 x 300 DPI)



Figure 2. Kaplan-Meier cumulative MACE-free curves in patients with NSTEMI (A) according to the cut-off value of MLR; (B) according to the cut-off value of NLR; (C) according to MLR combined with NLR.

282x289mm (300 x 300 DPI)



Figure 3. Receiver-operating characteristic curves showing area under the curve for (A) MLR in combination with NLR (MLR+NLR), MLR alone, NLR alone, hs-CRP alone and BNP alone; (B) MLR+NLR, MLR in combination with hs-CRP (MLR+hs-CRP), MLR in combination with BNP (MLR+BNP), NLR in combination with hs-CRP (NLR+hs-CRP), NLR in combination with BNP (NLR+BNP) and hs-CRP in combination with BNP (hs-CRP+BNP); for long-term MACE in NSTEMI patients.

359x211mm (300 x 300 DPI)

**Table S1 Associated factors of long-term MACE in patients with NSTEMI by univariate COX regression analyses (n=678)**

| Variable                           | non-MACE<br>(n=539) | MACE<br>(n=139) | Hazard<br>Ratio | 95%CI       | P Value |
|------------------------------------|---------------------|-----------------|-----------------|-------------|---------|
| Age /(year)                        | 62.18±15.54         | 65.26±13.78     | 1.127           | 0.056-1.127 | 0.033   |
| Male, n (%)                        | 345(64.01)          | 90(64.75)       | 0.968           | 0.656-1.430 | 0.871   |
| Family history, n (%)              | 67(12.43)           | 14(10.07)       | 1.267           | 0.689-2.330 | 0.445   |
| Hypertension, n(%)                 | 379(70.32)          | 106(76.26)      | 0.737           | 0.479-1.136 | 0.167   |
| Diabetes Mellitus, n(%)            | 215(39.89)          | 64(46.04)       | 0.778           | 0.534-1.132 | 0.189   |
| Dyslipidemia, n (%)                | 194(35.99)          | 55(39.57)       | 0.859           | 0.586-1.259 | 0.436   |
| Current Smoker, n (%)              | 191(35.44)          | 46(33.09)       | 1.110           | 0.748-1.647 | 0.606   |
| Killip class (> I)                 | 348(64.56)          | 98(70.50)       | 0.762           | 0.508-1.143 | 0.189   |
| Ejection fraction                  | 65.59±10.25         | 64.37±10.06     | 1.68            | 0.414-1.68  | 0.210   |
| <b>Laboratory parameters</b>       |                     |                 |                 |             |         |
| White blood cell, ×10 <sup>9</sup> | 6.75±2.09           | 7.28±2.59       | 1.138           | 1.029-1.258 | 0.012   |
| Neutrophil, ×10 <sup>9</sup>       | 4.42±1.16           | 5.02±1.18       | 1.198           | 1.121-1.280 | <0.001  |
| Lymphocyte, ×10 <sup>9</sup>       | 2.29±0.65           | 1.85±0.61       | 0.859           | 0.824-0.896 | <0.001  |
| Monocyte, ×10 <sup>9</sup>         | 0.27±0.13           | 0.36±0.15       | 2.606           | 1.987-3.419 | <0.001  |
| High MLR, n(%)                     | 141(26.16)          | 92(66.19)       | 5.525           | 3.702-8.245 | <0.001  |
| High NLR, n(%)                     | 172(31.91)          | 85(61.15)       | 3.359           | 2.283-4.942 | <0.001  |
| Hemoglobin /(g/L)                  | 132.87±36.22        | 134.26±32.85    | 1.146           | 0.598-2.195 | 0.681   |
| Total cholesterol /(mmol/L)        | 5.69±1.41           | 5.82±1.38       | 1.162           | 0.859-1.571 | 0.331   |
| Triglycerides /(mmol/L)            | 1.67±0.52           | 1.65±0.54       | 1.113           | 0.659-1.879 | 0.688   |
| LDL/(mmol/L)                       | 2.91±1.09           | 3.40±1.10       | 2.773           | 1.809-4.252 | <0.001  |
| HDL/(mmol/L)                       | 1.38±0.56           | 1.31±0.58       | 1.142           | 0.935-1.394 | 0.193   |
| hs-CRP/(mg/dL)                     | 2.21±0.65           | 2.68±0.77       | 2.601           | 2.003-3.379 | <0.001  |
| Creatinine /(umol/L)               | 109.58±35.12        | 113.67±34.78    | 1.384           | 0.823-2.327 | 0.220   |
| eGFR/(ml/min/1.73m <sup>2</sup> )  | 83.94±26.98         | 79.94±25.32     | 1.672           | 0.882-3.169 | 0.115   |
| BNP/(pg/ml)                        | 264.78±80.25        | 283.77±81.78    | 1.296           | 1.055-1.591 | 0.013   |
| Troponin I (ng/mL)                 | 7.05±3.18           | 8.11±3.32       | 1.732           | 1.268-2.364 | 0.001   |
| <b>Medical Treatment</b>           |                     |                 |                 |             |         |
| Aspirin, n(%)                      | 516(95.73)          | 137(98.56)      | 0.328           | 0.076-1.406 | 0.133   |
| Anticoagulant, n(%)                | 510(94.62)          | 129(92.81)      | 1.363           | 0.648-2.870 | 0.414   |
| Statin, n(%)                       | 486(90.17)          | 129(92.81)      | 0.711           | 0.352-1.436 | 0.341   |
| ACEI or ARB, n(%)                  | 315(58.44)          | 87(62.59)       | 0.841           | 0.573-1.234 | 0.375   |

|                                   |            |            |       |             |       |
|-----------------------------------|------------|------------|-------|-------------|-------|
| Beta-blocker, n(%)                | 429(79.59) | 119(85.61) | 0.655 | 0.391-1.100 | 0.110 |
| Calcium-channel blockers,<br>n(%) | 116(21.52) | 35(25.18)  | 0.815 | 0.528-1.258 | 0.358 |
| Nitrate drugs, n(%)               | 418(77.55) | 116(83.45) | 0.685 | 0.419-1.119 | 0.131 |

ACEI, angiotensin-converting enzyme inhibitor; ARB, angiotensin receptor blocker; BNP, brain natriuretic peptide; eGFR, estimated glomerular filtration rate; HDL, high-density lipoprotein; hs-CRP, high-sensitivity C-reactive protein; LDL, low-density lipoprotein; MLR, monocyte-to-lymphocyte ratio; NLR, neutrophil-to-lymphocyte ratio.

**Table S2 Independent predictors of long-term MACE in patients with NSTEMI by multivariate COX regression analyses**

| Variable                   | Hazard Ratio | 95% Confidence Interval | P value |
|----------------------------|--------------|-------------------------|---------|
| <b>Model 1</b>             |              |                         |         |
| White blood cell           | 1.142        | 0.969-1.347             | 0.113   |
| Neutrophil                 | 1.152        | 0.954-1.393             | 0.142   |
| Lymphocyte                 | 2.130        | 0.904-5.020             | 0.084   |
| Monocyte                   | 1.208        | 0.935-1.561             | 0.149   |
| MLR                        |              |                         |         |
| Low MLR, MLR<0.36          | Ref          |                         |         |
| High MLR, MLR≥0.36         | 2.128        | 1.458-3.105             | <0.001  |
| NLR                        |              |                         |         |
| Low NLR, NLR<2.15          | Ref          |                         |         |
| High NLR, NLR≥2.15         | 1.925        | 1.385-2.676             | <0.001  |
| LDL                        | 1.173        | 0.953-1.443             | 0.132   |
| hs-CRP                     | 1.747        | 1.173-2.601             | 0.006   |
| BNP                        | 1.950        | 1.156-3.290             | 0.012   |
| Troponin I                 | 1.179        | 0.961-1.446             | 0.115   |
| <b>Model 2</b>             |              |                         |         |
| White blood cell           | 1.140        | 0.957-1.358             | 0.142   |
| Neutrophil                 | 1.145        | 0.971-1.349             | 0.108   |
| Lymphocyte                 | 0.903        | 0.758-1.076             | 0.255   |
| Monocyte                   | 2.125        | 0.904-5.010             | 0.084   |
| Combination of MLR and NLR |              |                         |         |
| Low-MLR + Low-NLR          | Ref          | -                       | -       |
| Low-MLR + High-NLR         | 2.732        | 1.417-5.268             | 0.003   |

|                     |       |             |        |
|---------------------|-------|-------------|--------|
| High-MLR + Low-NLR  | 3.004 | 1.519-5.940 | 0.002  |
| High-MLR + High-NLR | 4.055 | 2.550-6.448 | <0.001 |
| LDL                 | 1.173 | 0.953-1.443 | 0.132  |
| hs-CRP              | 1.576 | 1.058-2.349 | 0.025  |
| BNP                 | 1.874 | 1.137-3.088 | 0.014  |
| Troponin I          | 1.170 | 0.966-1.417 | 0.108  |

Effect sizes are expressed as hazard ratios with 95% confidence intervals. BNP, brain natriuretic peptide; hs-CRP, high-sensitivity C-reactive protein; LDL, low-density lipoprotein; MLR, monocyte-to-lymphocyte ratio; NLR, neutrophil-to-lymphocyte ratio.



**STROBE 2007 (v4) Statement—Checklist of items that should be included in reports of *cohort studies***

| Section/Topic                | Item # | Recommendation                                                                                                                                                                       | Reported on page # |
|------------------------------|--------|--------------------------------------------------------------------------------------------------------------------------------------------------------------------------------------|--------------------|
| Title and abstract           | 1      | (a) Indicate the study's design with a commonly used term in the title or the abstract                                                                                               | 1,2                |
|                              |        | (b) Provide in the abstract an informative and balanced summary of what was done and what was found                                                                                  | 2-3                |
| <b>Introduction</b>          |        |                                                                                                                                                                                      |                    |
| Background/rationale         | 2      | Explain the scientific background and rationale for the investigation being reported                                                                                                 | 4                  |
| Objectives                   | 3      | State specific objectives, including any prespecified hypotheses                                                                                                                     | 4                  |
| <b>Methods</b>               |        |                                                                                                                                                                                      |                    |
| Study design                 | 4      | Present key elements of study design early in the paper                                                                                                                              | 5                  |
| Setting                      | 5      | Describe the setting, locations, and relevant dates, including periods of recruitment, exposure, follow-up, and data collection                                                      | 5                  |
| Participants                 | 6      | (a) Give the eligibility criteria, and the sources and methods of selection of participants. Describe methods of follow-up                                                           | 6-7                |
|                              |        | (b) For matched studies, give matching criteria and number of exposed and unexposed                                                                                                  | Not applicable     |
| Variables                    | 7      | Clearly define all outcomes, exposures, predictors, potential confounders, and effect modifiers. Give diagnostic criteria, if applicable                                             | 6-7                |
| Data sources/<br>measurement | 8*     | For each variable of interest, give sources of data and details of methods of assessment (measurement). Describe comparability of assessment methods if there is more than one group | 6                  |
| Bias                         | 9      | Describe any efforts to address potential sources of bias                                                                                                                            | 7                  |
| Study size                   | 10     | Explain how the study size was arrived at                                                                                                                                            | 5                  |
| Quantitative variables       | 11     | Explain how quantitative variables were handled in the analyses. If applicable, describe which groupings were chosen and why                                                         | 7                  |
| Statistical methods          | 12     | (a) Describe all statistical methods, including those used to control for confounding                                                                                                | 7-8                |
|                              |        | (b) Describe any methods used to examine subgroups and interactions                                                                                                                  | 7-8                |
|                              |        | (c) Explain how missing data were addressed                                                                                                                                          | 7-8                |
|                              |        | (d) If applicable, explain how loss to follow-up was addressed                                                                                                                       | 7-8                |
|                              |        | (e) Describe any sensitivity analyses                                                                                                                                                | 7-8                |
| <b>Results</b>               |        |                                                                                                                                                                                      |                    |

|                          |     |                                                                                                                                                                                                              |             |
|--------------------------|-----|--------------------------------------------------------------------------------------------------------------------------------------------------------------------------------------------------------------|-------------|
| Participants             | 13* | (a) Report numbers of individuals at each stage of study—eg numbers potentially eligible, examined for eligibility, confirmed eligible, included in the study, completing follow-up, and analysed            | 8-9         |
|                          |     | (b) Give reasons for non-participation at each stage                                                                                                                                                         | 8-9         |
|                          |     | (c) Consider use of a flow diagram                                                                                                                                                                           | 8, Figure 1 |
| Descriptive data         | 14* | (a) Give characteristics of study participants (eg demographic, clinical, social) and information on exposures and potential confounders                                                                     | 9-11        |
|                          |     | (b) Indicate number of participants with missing data for each variable of interest                                                                                                                          | 9           |
|                          |     | (c) Summarise follow-up time (eg, average and total amount)                                                                                                                                                  | 9           |
| Outcome data             | 15* | Report numbers of outcome events or summary measures over time                                                                                                                                               | 11-12       |
| Main results             | 16  | (a) Give unadjusted estimates and, if applicable, confounder-adjusted estimates and their precision (eg, 95% confidence interval). Make clear which confounders were adjusted for and why they were included | 12-14       |
|                          |     | (b) Report category boundaries when continuous variables were categorized                                                                                                                                    | 9           |
|                          |     | (c) If relevant, consider translating estimates of relative risk into absolute risk for a meaningful time period                                                                                             | 12-14       |
| Other analyses           | 17  | Report other analyses done—eg analyses of subgroups and interactions, and sensitivity analyses                                                                                                               | 14          |
| <b>Discussion</b>        |     |                                                                                                                                                                                                              |             |
| Key results              | 18  | Summarise key results with reference to study objectives                                                                                                                                                     | 14          |
| <b>Limitations</b>       |     |                                                                                                                                                                                                              |             |
| Interpretation           | 20  | Give a cautious overall interpretation of results considering objectives, limitations, multiplicity of analyses, results from similar studies, and other relevant evidence                                   | 18          |
| Generalisability         | 21  | Discuss the generalisability (external validity) of the study results                                                                                                                                        | 18          |
| <b>Other information</b> |     |                                                                                                                                                                                                              |             |
| Funding                  | 22  | Give the source of funding and the role of the funders for the present study and, if applicable, for the original study on which the present article is based                                                | 19          |

\*Give information separately for cases and controls in case-control studies and, if applicable, for exposed and unexposed groups in cohort and cross-sectional studies.

**Note:** An Explanation and Elaboration article discusses each checklist item and gives methodological background and published examples of transparent reporting. The STROBE checklist is best used in conjunction with this article (freely available on the Web sites of PLoS Medicine at <http://www.plosmedicine.org/>, Annals of Internal Medicine at <http://www.annals.org/>, and Epidemiology at <http://www.epidem.com/>). Information on the STROBE Initiative is available at [www.strobe-statement.org](http://www.strobe-statement.org).
